# Supplementary material for: Can Targeting Non-Contiguous V-Regions With Paired-End Sequencing Improve 16S rRNA-Based Taxonomic Resolution of Microbiomes?: An In Silico Evaluation
Source: PubMed Central journal article supplement (PMC6640118; doi:10.3389/fgene.2019.00653), 2019-07-12

## Supplementary Figure S3

**(A)** A comparison of the paired-end reads generated in the *in silico* experiments with respect to those which may be obtained by using different sets of primers currently available for 16S rRNA amplicon sequencing

| Target combination of V-regions | Set of available primers suitable for targeting the given combination | Forward primer sequence (5'-3') | Reverse primer sequence (5'-3') | Percentage (%) of 16S sequences the forward primer is specific to (out of 84,711 full-length sequences from RDP#) | Percentage (%) of 16S sequences the reverse primer is specific to (out of 84,711 full-length sequences from RDP#) | Overlap of read length (%) compared to HMM based extraction of V-region combinations |
|---------------------------------|-----------------------------------------------------------------------|---------------------------------|---------------------------------|-------------------------------------------------------------------------------------------------------------------|-------------------------------------------------------------------------------------------------------------------|--------------------------------------------------------------------------------------|
| V1+V4                           | 68F - 798R                                                            | TNANACATGCAAGTCGRRCG            | AGGATTAGATACCCT                 | 95.24                                                                                                             | 99.70                                                                                                             | 77.60                                                                                |
| V1+V3                           | 68F - U529R                                                           | TNANACATGCAAGTCGRRCG            | GCCAGCMGCCGCGGT                 | 95.24                                                                                                             | 99.45                                                                                                             | 91.20                                                                                |
| V1+V8                           | 68F - 1401R                                                           | TNANACATGCAAGTCGRRCG            | GGTCTTGTACACACCG                | 95.24                                                                                                             | 99.57                                                                                                             | 81.56                                                                                |
| V1+V7                           | 68F - GM12R                                                           | TNANACATGCAAGTCGRRCG            | GAGGAAGGTGKGGATGACG             | 95.24                                                                                                             | 95.91                                                                                                             | 88.60                                                                                |
| V1+V6                           | 68F - 1061R                                                           | TNANACATGCAAGTCGRRCG            | GTCGTCAGCTCGTGYG                | 95.24                                                                                                             | 98.66                                                                                                             | 89.20                                                                                |
| V1+V5                           | 68F - 908R                                                            | TNANACATGCAAGTCGRRCG            | AACTCAAAGAATTGACG               | 95.24                                                                                                             | 99.27                                                                                                             | 90.60                                                                                |
| V1+V9                           | 68F - 1407R                                                           | TNANACATGCAAGTCGRRCG            | GYACACACCGCCCGTC                | 95.24                                                                                                             | 99.47                                                                                                             | 76.18                                                                                |
| V2+V4                           | pBR-V1.ASF - 798R                                                     | AGTGGCGGACGGGTGAGTAA            | AGGATTAGATACCCT                 | 95.47                                                                                                             | 99.70                                                                                                             | 82.88                                                                                |
| V2+V8                           | pBR-V1.ASF - 1401R                                                    | AGTGGCGGACGGGTGAGTAA            | GGTCTTGTACACACCG                | 95.47                                                                                                             | 99.57                                                                                                             | 86.84                                                                                |
| V2+V6                           | pBR-V1.ASF - 1061R                                                    | AGTGGCGGACGGGTGAGTAA            | GTCGTCAGCTCGTGYG                | 95.47                                                                                                             | 98.66                                                                                                             | 94.48                                                                                |
| V2+V7                           | pBR-V1.ASF - GM12R                                                    | AGTGGCGGACGGGTGAGTAA            | GAGGAAGGTGKGGATGACG             | 95.47                                                                                                             | 95.91                                                                                                             | 93.88                                                                                |
| V2V3*                           | pBR-V1.ASF - U529R                                                    | AGTGGCGGACGGGTGAGTAA            | GCCAGCMGCCGCGGT                 | 95.47                                                                                                             | 99.45                                                                                                             | 96.48                                                                                |
| V2+V9                           | pBR-V1.ASF - 1407R                                                    | AGTGGCGGACGGGTGAGTAA            | GYACACACCGCCCGTC                | 95.47                                                                                                             | 99.47                                                                                                             | 81.46                                                                                |
| V1V2*                           | 68F - 338R                                                            | TNANACATGCAAGTCGRRCG            | ACTCTACGGGAGGCAGCA              | 95.24                                                                                                             | 99.14                                                                                                             | 79.80                                                                                |
| V3+V8                           | 347F - 1401R                                                          | GGAGGCAGCAGTRRGAAT              | GGTCTTGTACACACCG                | 98.94                                                                                                             | 99.57                                                                                                             | 87.56                                                                                |
| V3+V7                           | 347F - GM12R                                                          | GGAGGCAGCAGTRRGAAT              | GAGGAAGGTGKGGATGACG             | 98.94                                                                                                             | 95.91                                                                                                             | 94.60                                                                                |
| V2+V5                           | pBR-V1.ASF - 908R                                                     | AGTGGCGGACGGGTGAGTAA            | AACTCAAAGAATTGACG               | 95.47                                                                                                             | 99.27                                                                                                             | 95.88                                                                                |
| V3+V6                           | 347F - 1061R                                                          | GGAGGCAGCAGTRRGAAT              | GTCGTCAGCTCGTGYG                | 98.94                                                                                                             | 98.66                                                                                                             | 95.20                                                                                |
| V3+V9                           | 347F - 1407R                                                          | GGAGGCAGCAGTRRGAAT              | GYACACACCGCCCGTC                | 98.94                                                                                                             | 99.47                                                                                                             | 82.17                                                                                |
| V3+V5                           | 347F - 908R                                                           | GGAGGCAGCAGTRRGAAT              | AACTCAAAGAATTGACG               | 98.94                                                                                                             | 99.27                                                                                                             | 96.60                                                                                |

\* contiguous combination

# *in silico* experiments performed with 84,711 full length sequences from the RDP database which contained all nine V-regions.

(primer specificity evaluated while allowing a maximum mismatch of 2 base pairs)

Result of similar *in silico* experiments for assessing primer specificity performed with all sequences from RDP are presented in Supplementary Table S8.

**(B)** A comparison of taxonomic profiling accuracy obtained with V1+V5 paired-end reads generated in the *in silico* experiments with respect to those which may be obtained by using 68F-908R primers (currently available for 16S rRNA amplicon sequencing). Results pertaining to simulated host (human) associated microbiomes (as presented in Figure 5) are depicted.

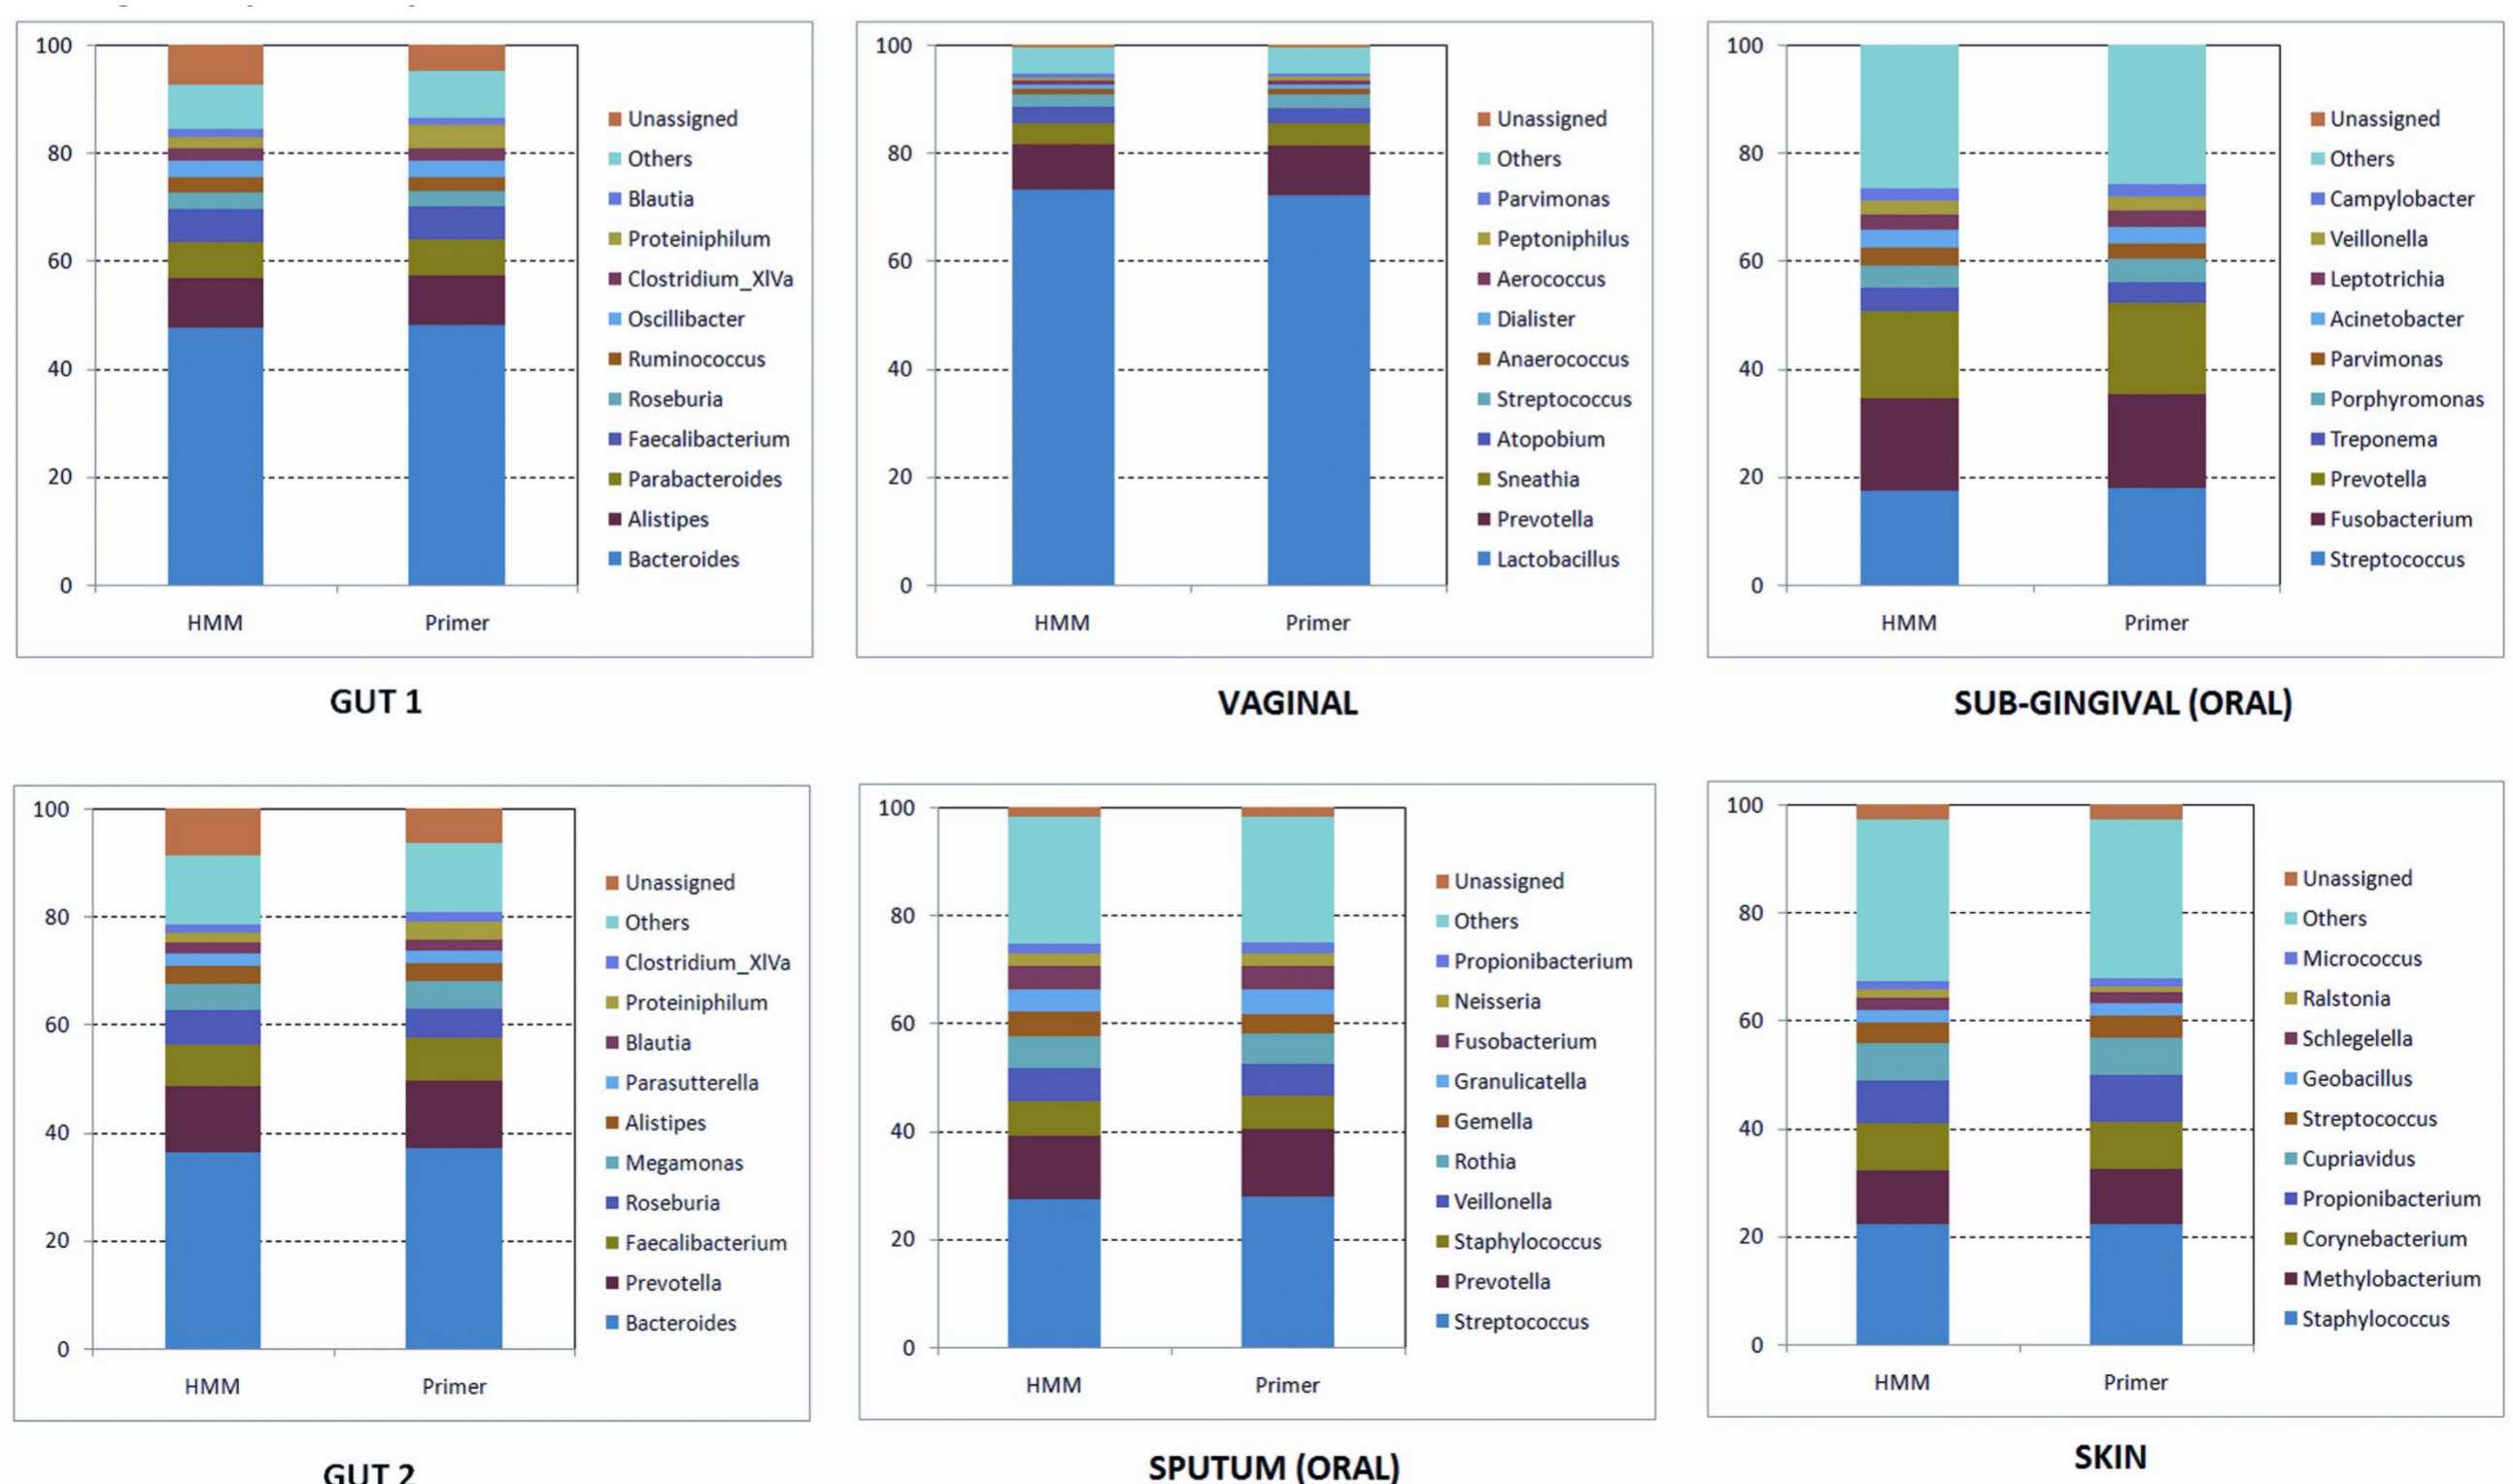

Supplement: Image_3.pdf [file Image_3.pdf]
