# Supplementary material for: Can Targeting Non-Contiguous V-Regions With Paired-End Sequencing Improve 16S rRNA-Based Taxonomic Resolution of Microbiomes?: An In Silico Evaluation
Source: Front Genet. 2019 Jul 12;10:653. doi: 10.3389/fgene.2019.00653 (PMC6640118; doi:10.3389/fgene.2019.00653)
Supplement: Supplementary file 5 [file Table_5.xlsx]

## Sheet: Supplementary Table S5
Supplementary Table S5. Taxonomic classification accuracies (in terms of number of correct assignments) obtained using different V-regions extracted from 16S rRNA sequences downloaded from RDP database. Accuracy of taxonomic assignments has been evaluated at the Genus level considering preannotated lineages available in RDP. Number of correct assignments obtained using full-length 16S rRNA genes …
Genera	Total number of Sequences	Full length Sequences	V1	V2	V3	V4	V5	V6	V7	V8	V9	Lineage
Abiotrophia	4	4	0	3	1	0	0	3	0	0	0	p__Firmicutes:c__Bacilli:o__Lactobacillales:f__Aerococcaceae:g__Abiotrophia
Acaricomes	1	1	0	1	1	0	0	1	0	0	0	p__"Actinobacteria":c__Actinobacteria:o__Actinomycetales:f__Micrococcaceae:g__Acaricomes
Acetanaerobacterium	2	2	1	2	0	2	0	0	0	2	0	p__Firmicutes:c__Clostridia:o__Clostridiales:f__Ruminococcaceae:g__Acetanaerobacterium
Acetitomaculum	1	1	0	1	0	1	0	0	0	1	0	p__Firmicutes:c__Clostridia:o__Clostridiales:f__Lachnospiraceae:g__Acetitomaculum
Acetivibrio	5	3	0	2	0	2	0	0	0	2	0	p__Firmicutes:c__Clostridia:o__Clostridiales:f__Ruminococcaceae:g__Acetivibrio
Acetobacter	305	289	0	29	0	276	0	260	160	123	0	p__"Proteobacteria":c__Alphaproteobacteria:o__Rhodospirillales:f__Acetobacteraceae:g__Acetobacter
Acetobacterium	32	32	0	23	0	27	0	19	25	25	0	p__Firmicutes:c__Clostridia:o__Clostridiales:f__Eubacteriaceae:g__Acetobacterium
Acetohalobium	6	6	0	6	6	5	0	6	0	6	0	p__Firmicutes:c__Clostridia:o__Halanaerobiales:f__Halobacteroidaceae:g__Acetohalobium
Acetonema	2	2	0	1	1	2	0	1	2	2	0	p__Firmicutes:c__Clostridia:o__Clostridiales:f__Veillonellaceae:g__Acetonema
Acholeplasma	26	25	0	23	9	25	0	1	21	17	0	p__"Tenericutes":c__Mollicutes:o__Acholeplasmatales:f__Acholeplasmataceae:g__Acholeplasma
Achromobacter	207	194	0	167	172	68	0	37	0	185	0	p__"Proteobacteria":c__Betaproteobacteria:o__Burkholderiales:f__Alcaligenaceae:g__Achromobacter
Acidaminobacter	1	1	0	1	0	1	0	0	0	1	0	p__Firmicutes:c__Clostridia:o__Clostridiales:f__Clostridiales_Incertae Sedis XII:g__Acidaminobacter
Acidaminococcus	13	13	0	13	12	13	0	8	13	12	0	p__Firmicutes:c__Clostridia:o__Clostridiales:f__Veillonellaceae:g__Acidaminococcus
Acidiferrobacter	2	2	0	2	2	2	0	1	0	0	0	p__Nitrospinae:c__Fimbriimonadia:o__Fimbriimonadales:f__Defluviitaleaceae:g__Acidiferrobacter
Acidimicrobium	4	4	0	4	0	4	0	0	1	0	0	p__"Actinobacteria":c__Actinobacteria:o__Acidimicrobiales:f__Acidimicrobiaceae:g__Acidimicrobium
Acidiphilium	64	64	0	54	0	57	0	50	52	54	0	p__"Proteobacteria":c__Alphaproteobacteria:o__Rhodospirillales:f__Acetobacteraceae:g__Acidiphilium
Acidisoma	2	2	0	2	0	2	0	2	0	2	0	p__"Proteobacteria":c__Alphaproteobacteria:o__Rhodospirillales:f__Acetobacteraceae:g__Acidisoma
Acidisphaera	5	4	0	0	0	3	0	1	0	0	0	p__"Proteobacteria":c__Alphaproteobacteria:o__Rhodospirillales:f__Acetobacteraceae:g__Acidisphaera
Aciditerrimonas	3	2	0	1	0	1	0	0	0	1	0	p__"Actinobacteria":c__Actinobacteria:o__Acidimicrobiales:f__"Acidimicrobineae"_incertae_sedis:g__Aciditerrimonas
Acidithiobacillus	134	132	0	120	94	131	0	68	118	125	0	p__"Proteobacteria":c__Gammaproteobacteria:o__Acidithiobacillales:f__Acidithiobacillaceae:g__Acidithiobacillus
Acidocella	10	10	0	7	0	7	0	7	0	7	0	p__"Proteobacteria":c__Alphaproteobacteria:o__Rhodospirillales:f__Acetobacteraceae:g__Acidocella
Acidomonas	18	18	0	0	0	18	0	0	0	0	0	p__"Proteobacteria":c__Alphaproteobacteria:o__Rhodospirillales:f__Acetobacteraceae:g__Acidomonas
Acidovorax	100	95	0	86	43	38	0	43	0	30	0	p__"Proteobacteria":c__Betaproteobacteria:o__Burkholderiales:f__Comamonadaceae:g__Acidovorax
Acinetobacter	1237	1236	0	758	1104	1216	0	1056	775	660	0	p__"Proteobacteria":c__Gammaproteobacteria:o__Pseudomonadales:f__Moraxellaceae:g__Acinetobacter
Acrocarpospora	8	7	0	3	0	0	0	0	0	0	0	p__"Actinobacteria":c__Actinobacteria:o__Actinomycetales:f__Streptosporangiaceae:g__Acrocarpospora
Actibacter	1	1	0	0	0	0	0	0	0	1	0	p__"Bacteroidetes":c__Flavobacteriia:o__"Flavobacteriales":f__Flavobacteriaceae:g__Actibacter
Actinoallomurus	33	33	0	23	0	33	0	0	0	23	0	p__"Actinobacteria":c__Actinobacteria:o__Actinomycetales:f__Thermomonosporaceae:g__Actinoallomurus
Actinoalloteichus	8	1	0	0	0	0	0	1	0	0	0	p__"Actinobacteria":c__Actinobacteria:o__Actinomycetales:f__Pseudonocardiaceae:g__Actinoalloteichus
Actinobacillus	116	106	0	42	67	73	0	0	0	86	0	p__"Proteobacteria":c__Gammaproteobacteria:o__Pasteurellales:f__Pasteurellaceae:g__Actinobacillus
Actinobaculum	26	26	0	11	16	26	0	3	23	0	8	p__"Actinobacteria":c__Actinobacteria:o__Actinomycetales:f__Actinomycetaceae:g__Actinobaculum
Actinocatenispora	4	4	0	4	0	4	0	0	4	0	0	p__"Actinobacteria":c__Actinobacteria:o__Actinomycetales:f__Micromonosporaceae:g__Actinocatenispora
Actinocorallia	15	15	0	7	0	15	0	0	0	0	0	p__"Actinobacteria":c__Actinobacteria:o__Actinomycetales:f__Thermomonosporaceae:g__Actinocorallia
Actinokineospora	2	2	0	0	0	0	0	0	0	0	0	p__"Actinobacteria":c__Actinobacteria:o__Actinomycetales:f__Pseudonocardiaceae:g__Actinokineospora
Actinomadura	140	134	0	28	0	111	0	5	2	0	0	p__"Actinobacteria":c__Actinobacteria:o__Actinomycetales:f__Thermomonosporaceae:g__Actinomadura
Actinomyces	11	8	0	5	2	6	0	0	1	0	0	p__"Actinobacteria":c__Actinobacteria:o__Actinomycetales:f__Actinomycetaceae:g__Actinomyces
Actinoplanes	42	42	0	13	0	22	0	0	0	5	0	p__"Actinobacteria":c__Actinobacteria:o__Actinomycetales:f__Micromonosporaceae:g__Actinoplanes
Actinopolymorpha	4	4	0	3	0	4	0	0	4	3	0	p__"Actinobacteria":c__Actinobacteria:o__Actinomycetales:f__Nocardioidaceae:g__Actinopolymorpha
Actinopolyspora	30	27	1	13	0	26	0	5	21	10	22	p__"Actinobacteria":c__Actinobacteria:o__Actinomycetales:f__Actinopolysporaceae:g__Actinopolyspora
Actinotalea	6	3	0	3	0	0	0	0	0	0	0	p__"Actinobacteria":c__Actinobacteria:o__Actinomycetales:f__Cellulomonadaceae:g__Actinotalea
Adlercreutzia	9	9	0	0	0	0	0	0	0	0	0	p__"Actinobacteria":c__Actinobacteria:o__Coriobacteriales:f__Coriobacteriaceae:g__Adlercreutzia
Advenella	11	11	0	10	7	1	0	9	0	9	0	p__"Proteobacteria":c__Betaproteobacteria:o__Burkholderiales:f__Alcaligenaceae:g__Advenella
Aequorivita	10	10	0	6	0	8	0	0	0	9	0	p__"Bacteroidetes":c__Flavobacteriia:o__"Flavobacteriales":f__Flavobacteriaceae:g__Aequorivita
Aeribacillus	15	15	0	15	8	15	0	15	0	15	0	p__Firmicutes:c__Erysipelotrichia:o__Erysipelotrichales:f__Erysipelotrichaceae:g__Aeribacillus
Aeriscardovia	1	1	0	1	0	1	0	1	1	1	0	p__"Actinobacteria":c__Actinobacteria:o__Bifidobacteriales:f__Bifidobacteriaceae:g__Aeriscardovia
Aerococcus	38	38	0	30	36	31	0	0	0	2	0	p__Firmicutes:c__Bacilli:o__Lactobacillales:f__Aerococcaceae:g__Aerococcus
Aeromicrobium	36	35	0	14	0	30	0	0	0	0	0	p__"Actinobacteria":c__Actinobacteria:o__Actinomycetales:f__Nocardioidaceae:g__Aeromicrobium
Aeromonas	737	736	0	367	612	734	0	287	706	719	0	p__"Proteobacteria":c__Gammaproteobacteria:o__Aeromonadales:f__Aeromonadaceae:g__Aeromonas
Aestuariibacter	6	6	0	4	4	3	0	3	0	4	0	p__"Proteobacteria":c__Gammaproteobacteria:o__Alteromonadales:f__Alteromonadaceae:g__Aestuariibacter
Aestuariibaculum	1	1	0	1	0	0	0	0	0	1	0	p__Nitrospinae:c__Fimbriimonadia:o__Fimbriimonadales:f__Defluviitaleaceae:g__Aestuariibaculum
Aestuariicola	1	1	0	1	0	0	0	0	0	0	0	p__"Bacteroidetes":c__Flavobacteriia:o__"Flavobacteriales":f__Flavobacteriaceae:g__Aestuariicola
Aestuariimicrobium	5	5	0	5	0	5	0	0	5	5	0	p__"Actinobacteria":c__Actinobacteria:o__Actinomycetales:f__Propionibacteriaceae:g__Aestuariimicrobium
Afifella	14	5	0	0	0	2	0	0	0	0	0	p__"Proteobacteria":c__Alphaproteobacteria:o__Rhizobiales:f__Rhodobiaceae:g__Afifella
Afipia	48	17	0	0	0	1	0	2	0	0	0	p__"Proteobacteria":c__Alphaproteobacteria:o__Rhizobiales:f__Bradyrhizobiaceae:g__Afipia
Agaricicola	1	1	0	0	0	1	0	1	0	1	0	p__"Proteobacteria":c__Alphaproteobacteria:o__Rhodobacterales:f__Rhodobacteraceae:g__Agaricicola
Agarivorans	13	13	0	3	9	13	0	3	0	13	0	p__"Proteobacteria":c__Gammaproteobacteria:o__Alteromonadales:f__Alteromonadaceae:g__Agarivorans
Aggregatibacter	59	57	0	21	36	45	0	52	0	56	0	p__"Proteobacteria":c__Gammaproteobacteria:o__Pasteurellales:f__Pasteurellaceae:g__Aggregatibacter
Agreia	16	5	0	5	0	0	0	0	0	0	0	p__"Actinobacteria":c__Actinobacteria:o__Actinomycetales:f__Microbacteriaceae:g__Agreia
Agrococcus	32	31	0	22	0	9	0	17	0	0	0	p__"Actinobacteria":c__Actinobacteria:o__Actinomycetales:f__Microbacteriaceae:g__Agrococcus
Agromyces	60	60	0	37	1	19	0	28	13	55	0	p__"Actinobacteria":c__Actinobacteria:o__Actinomycetales:f__Microbacteriaceae:g__Agromyces
Aidingimonas	2	2	0	1	1	0	0	0	0	2	0	p__"Proteobacteria":c__Gammaproteobacteria:o__Oceanospirillales:f__Halomonadaceae:g__Aidingimonas
Akkermansia	4	4	0	4	0	4	0	4	4	4	0	p__"Verrucomicrobia":c__Verrucomicrobiae:o__Verrucomicrobiales:f__Verrucomicrobiaceae:g__Akkermansia
Albidiferax	19	9	0	2	2	11	0	0	0	0	0	p__"Proteobacteria":c__Betaproteobacteria:o__Burkholderiales:f__Comamonadaceae:g__Albidiferax
Albidovulum	3	3	0	0	0	1	0	2	2	0	0	p__"Proteobacteria":c__Alphaproteobacteria:o__Rhodobacterales:f__Rhodobacteraceae:g__Albidovulum
Albimonas	2	2	0	0	0	1	0	1	0	0	0	p__"Proteobacteria":c__Alphaproteobacteria:o__Rhodobacterales:f__Rhodobacteraceae:g__Albimonas
Alcaligenes	165	108	0	18	47	98	0	79	0	1	0	p__"Proteobacteria":c__Betaproteobacteria:o__Burkholderiales:f__Alcaligenaceae:g__Alcaligenes
Alcanivorax	126	126	0	70	94	106	0	0	0	75	0	p__"Proteobacteria":c__Gammaproteobacteria:o__Oceanospirillales:f__Alcanivoracaceae:g__Alcanivorax
Algibacter	20	18	0	1	0	10	0	0	0	0	0	p__"Bacteroidetes":c__Flavobacteriia:o__"Flavobacteriales":f__Flavobacteriaceae:g__Algibacter
Algicola	4	2	0	2	2	1	0	1	0	1	0	p__"Proteobacteria":c__Gammaproteobacteria:o__Alteromonadales:f__Pseudoalteromonadaceae:g__Algicola
Algoriphagus	8	8	0	4	2	4	0	0	7	3	0	p__"Bacteroidetes":c__Sphingobacteriia:o__"Sphingobacteriales":f__Cyclobacteriaceae:g__Algoriphagus
Aliagarivorans	2	2	0	2	2	2	0	2	0	2	0	p__"Proteobacteria":c__Gammaproteobacteria:o__Alteromonadales:f__Alteromonadaceae:g__Aliagarivorans
Alicyclobacillus	144	138	0	95	109	135	0	64	128	56	0	p__Firmicutes:c__Bacilli:o__Bacillales:f__Alicyclobacillaceae:g__Alicyclobacillus
Aliidiomarina	1	1	0	1	1	1	0	0	0	1	0	p__Nitrospinae:c__Fimbriimonadia:o__Magnetococcales:f__SAR11:g__Aliidiomarina
Aliivibrio	100	100	0	51	70	99	0	31	0	3	0	p__"Proteobacteria":c__Gammaproteobacteria:o__"Vibrionales":f__Vibrionaceae:g__Aliivibrio
Alistipes	1	1	0	1	0	1	0	0	0	1	0	p__"Bacteroidetes":c__"Bacteroidia":o__"Bacteroidales":f__"Rikenellaceae":g__Alistipes
Alkalibacillus	22	22	0	22	8	22	0	14	0	21	0	p__Firmicutes:c__Bacilli:o__Bacillales:f__Bacillaceae 2:g__Alkalibacillus
Alkalibacter	1	1	0	1	0	1	0	1	1	1	0	p__Firmicutes:c__Clostridia:o__Clostridiales:f__Eubacteriaceae:g__Alkalibacter
Alkalibacterium	51	51	0	51	51	38	0	48	1	50	9	p__Firmicutes:c__Bacilli:o__Lactobacillales:f__Carnobacteriaceae:g__Alkalibacterium
Alkalilimnicola	4	4	0	4	4	4	0	1	0	0	0	p__"Proteobacteria":c__Gammaproteobacteria:o__Chromatiales:f__Ectothiorhodospiraceae:g__Alkalilimnicola
Alkaliphilus	23	23	2	13	0	12	0	23	0	13	0	p__Firmicutes:c__Clostridia:o__Clostridiales:f__Clostridiaceae 2:g__Alkaliphilus
Alkalispirillum	9	1	0	0	0	0	0	0	0	0	0	p__"Proteobacteria":c__Gammaproteobacteria:o__Chromatiales:f__Ectothiorhodospiraceae:g__Alkalispirillum
Alkanibacter	1	1	0	1	1	1	0	0	0	0	0	p__"Proteobacteria":c__Gammaproteobacteria:o__Xanthomonadales:f__Sinobacteraceae:g__Alkanibacter
Alkanindiges	1	1	0	1	1	1	0	1	0	0	0	p__"Proteobacteria":c__Gammaproteobacteria:o__Pseudomonadales:f__Moraxellaceae:g__Alkanindiges
Allisonella	1	1	0	1	1	1	0	1	1	1	0	p__Firmicutes:c__Clostridia:o__Clostridiales:f__Veillonellaceae:g__Allisonella
Allobaculum	1	1	0	1	1	1	0	0	1	1	0	p__Firmicutes:c__Erysipelotrichia:o__Erysipelotrichales:f__Erysipelotrichaceae:g__Allobaculum
Allochromatium	16	16	0	4	13	15	0	3	3	16	0	p__"Proteobacteria":c__Gammaproteobacteria:o__Chromatiales:f__Chromatiaceae:g__Allochromatium
Allofustis	2	2	0	2	2	2	0	2	2	2	0	p__Firmicutes:c__Bacilli:o__Lactobacillales:f__Carnobacteriaceae:g__Allofustis
Alloiococcus	3	3	0	3	3	3	0	1	0	1	0	p__Firmicutes:c__Bacilli:o__Lactobacillales:f__Carnobacteriaceae:g__Alloiococcus
Allomonas	1	0	0	0	0	0	0	0	0	0	0	p__"Proteobacteria":c__Gammaproteobacteria:o__"Vibrionales":f__Vibrionaceae:g__Allomonas
Alloscardovia	3	3	0	3	0	1	0	2	0	0	0	p__"Actinobacteria":c__Actinobacteria:o__Bifidobacteriales:f__Bifidobacteriaceae:g__Alloscardovia
Alpinimonas	1	1	0	0	0	0	0	0	0	1	0	p__Nitrospinae:c__Thermoflexia:o__Candidatus Brocadiales:f__Candidatus Brocadiaceae:g__Alpinimonas
Altererythrobacter	29	29	0	0	0	5	0	11	0	2	0	p__"Proteobacteria":c__Alphaproteobacteria:o__Sphingomonadales:f__Erythrobacteraceae:g__Altererythrobacter
Alterococcus	1	1	0	1	1	1	0	1	1	1	0	p__"Verrucomicrobia":c__Opitutae:o__Opitutales:f__Opitutaceae:g__Alterococcus
Alteromonas	243	220	0	201	214	178	0	121	0	213	0	p__"Proteobacteria":c__Gammaproteobacteria:o__Alteromonadales:f__Alteromonadaceae:g__Alteromonas
Alysiella	10	10	0	9	10	10	0	4	0	0	0	p__"Proteobacteria":c__Betaproteobacteria:o__Neisseriales:f__Neisseriaceae:g__Alysiella
Amaricoccus	7	6	0	0	0	2	0	4	0	0	0	p__"Proteobacteria":c__Alphaproteobacteria:o__Rhodobacterales:f__Rhodobacteraceae:g__Amaricoccus
Ameyamaea	4	4	0	0	0	0	0	4	0	0	0	p__"Proteobacteria":c__Alphaproteobacteria:o__Rhodospirillales:f__Acetobacteraceae:g__Ameyamaea
Aminobacter	28	27	0	0	0	23	0	0	0	0	0	p__"Proteobacteria":c__Alphaproteobacteria:o__Rhizobiales:f__Phyllobacteriaceae:g__Aminobacter
Aminomonas	4	3	0	3	0	3	0	3	3	0	0	p__"Synergistetes":c__Synergistia:o__Synergistales:f__Synergistaceae:g__Aminomonas
Ammonifex	3	3	0	3	3	3	0	3	3	3	3	p__Firmicutes:c__Clostridia:o__Thermoanaerobacterales:f__Thermoanaerobacteraceae:g__Ammonifex
Ammoniphilus	7	7	0	5	2	2	0	3	0	5	0	p__Firmicutes:c__Bacilli:o__Bacillales:f__Paenibacillaceae 2:g__Ammoniphilus
Amnibacterium	2	2	0	1	0	0	0	0	0	0	0	p__"Actinobacteria":c__Actinobacteria:o__Actinomycetales:f__Microbacteriaceae:g__Amnibacterium
Amorphus	2	2	0	0	0	1	0	1	0	0	0	p__"Proteobacteria":c__Alphaproteobacteria:o__Rhizobiales:f__Rhizobiales_incertae_sedis:g__Amorphus
Amphibacillus	26	24	0	5	20	24	0	17	0	0	0	p__Firmicutes:c__Bacilli:o__Bacillales:f__Bacillaceae 2:g__Amphibacillus
Amphritea	9	9	0	8	5	5	0	5	0	4	0	p__"Proteobacteria":c__Gammaproteobacteria:o__Oceanospirillales:f__Oceanospirillaceae:g__Amphritea
Amycolatopsis	3	2	0	1	0	0	0	0	0	0	0	p__"Actinobacteria":c__Actinobacteria:o__Actinomycetales:f__Pseudonocardiaceae:g__Amycolatopsis
Anaeroarcus	1	1	0	1	0	0	0	1	0	0	0	p__Firmicutes:c__Clostridia:o__Clostridiales:f__Veillonellaceae:g__Anaeroarcus
Anaerobacillus	5	5	0	5	4	0	0	1	0	5	0	p__Firmicutes:c__Erysipelotrichia:o__Erysipelotrichales:f__Erysipelotrichaceae:g__Anaerobacillus
Anaerobacter	2	2	0	2	0	2	0	1	2	2	0	p__Firmicutes:c__Clostridia:o__Clostridiales:f__Clostridiaceae 1:g__Anaerobacter
Anaerobaculum	3	3	0	3	0	3	0	3	3	3	3	p__"Synergistetes":c__Synergistia:o__Synergistales:f__Synergistaceae:g__Anaerobaculum
Anaerobiospirillum	4	4	0	2	0	3	0	1	2	1	0	p__"Proteobacteria":c__Gammaproteobacteria:o__Aeromonadales:f__Succinivibrionaceae:g__Anaerobiospirillum
Anaerobranca	10	10	0	10	0	10	0	8	9	10	0	p__Firmicutes:c__Clostridia:o__Clostridiales:f__Clostridiales_Incertae Sedis XIV:g__Anaerobranca
Anaerococcus	23	23	0	15	0	23	0	14	20	17	0	p__Firmicutes:c__Clostridia:o__Clostridiales:f__Clostridiales_Incertae Sedis XI:g__Anaerococcus
Anaerofilum	2	2	0	2	0	2	0	0	2	2	0	p__Firmicutes:c__Clostridia:o__Clostridiales:f__Ruminococcaceae:g__Anaerofilum
Anaerofustis	1	1	0	1	0	1	0	0	1	1	0	p__Firmicutes:c__Clostridia:o__Clostridiales:f__Eubacteriaceae:g__Anaerofustis
Anaeroglobus	1	1	0	1	1	1	0	1	0	1	0	p__Firmicutes:c__Clostridia:o__Clostridiales:f__Veillonellaceae:g__Anaeroglobus
Anaerolinea	4	4	0	4	0	4	0	2	0	2	0	p__"Chloroflexi":c__Anaerolineae:o__Anaerolineales:f__Anaerolineaceae:g__Anaerolinea
Anaeromusa	1	1	0	1	0	0	0	0	0	1	0	p__Firmicutes:c__Clostridia:o__Clostridiales:f__Veillonellaceae:g__Anaeromusa
Anaeromyxobacter	23	23	0	21	20	21	0	0	22	22	0	p__"Proteobacteria":c__Deltaproteobacteria:o__Myxococcales:f__Cystobacteraceae:g__Anaeromyxobacter
Anaeroplasma	3	3	0	1	0	3	0	0	3	3	0	p__"Tenericutes":c__Mollicutes:o__Anaeroplasmatales:f__Anaeroplasmataceae:g__Anaeroplasma
Anaerorhabdus	2	2	0	2	2	2	0	0	0	0	0	p__"Bacteroidetes":c__"Bacteroidia":o__"Bacteroidales":f__Bacteroidaceae:g__Anaerorhabdus
Anaerosalibacter	2	2	0	2	0	2	0	1	0	1	0	p__Nitrospinae:c__Thermoflexia:o__Candidatus Brocadiales:f__Candidatus Brocadiaceae:g__Anaerosalibacter
Anaerosinus	1	1	0	1	1	1	0	1	0	1	0	p__Firmicutes:c__Clostridia:o__Clostridiales:f__Veillonellaceae:g__Anaerosinus
Anaerosphaera	1	1	0	1	0	1	0	1	1	1	0	p__Firmicutes:c__Clostridia:o__Clostridiales:f__Peptoniphilaceae:g__Anaerosphaera
Anaerosporobacter	2	1	0	1	0	1	0	1	0	1	0	p__Firmicutes:c__Clostridia:o__Clostridiales:f__Lachnospiraceae:g__Anaerosporobacter
Anaerostipes	9	8	0	3	0	4	0	1	1	3	0	p__Firmicutes:c__Clostridia:o__Clostridiales:f__Lachnospiraceae:g__Anaerostipes
Anaerotruncus	2	2	0	1	0	2	0	0	0	1	0	p__Firmicutes:c__Clostridia:o__Clostridiales:f__Ruminococcaceae:g__Anaerotruncus
Anaerovibrio	3	3	1	3	2	2	0	0	2	3	0	p__Firmicutes:c__Clostridia:o__Clostridiales:f__Veillonellaceae:g__Anaerovibrio
Anaerovirgula	1	1	0	1	0	1	0	1	0	1	0	p__Firmicutes:c__Clostridia:o__Clostridiales:f__Clostridiaceae 2:g__Anaerovirgula
Anaerovorax	2	2	0	1	0	1	0	0	1	1	0	p__Firmicutes:c__Clostridia:o__Clostridiales:f__Clostridiales_Incertae Sedis XIII:g__Anaerovorax
Anaplasma	1	1	0	0	0	1	0	0	0	0	0	p__"Proteobacteria":c__Alphaproteobacteria:o__Rickettsiales:f__Anaplasmataceae:g__Anaplasma
Ancylobacter	20	19	0	0	0	15	0	17	0	13	0	p__"Proteobacteria":c__Alphaproteobacteria:o__Rhizobiales:f__Xanthobacteraceae:g__Ancylobacter
Anderseniella	2	2	0	0	0	2	0	0	0	0	0	p__"Proteobacteria":c__Alphaproteobacteria:o__Rhizobiales:f__Rhodobiaceae:g__Anderseniella
Andreprevotia	1	1	0	1	1	1	0	1	1	0	0	p__"Proteobacteria":c__Betaproteobacteria:o__Neisseriales:f__Neisseriaceae:g__Andreprevotia
Aneurinibacillus	42	42	0	39	42	41	0	26	12	33	2	p__Firmicutes:c__Bacilli:o__Bacillales:f__Paenibacillaceae 2:g__Aneurinibacillus
Angulomicrobium	2	2	0	0	0	0	0	2	0	2	0	p__"Proteobacteria":c__Alphaproteobacteria:o__Rhizobiales:f__Hyphomicrobiaceae:g__Angulomicrobium
Angustibacter	3	3	0	3	0	2	0	0	0	2	0	p__"Actinobacteria":c__Actinobacteria:o__Actinomycetales:f__Kineosporiaceae:g__Angustibacter
Anoxybacillus	94	90	0	56	56	67	0	76	53	79	0	p__Firmicutes:c__Bacilli:o__Bacillales:f__Bacillaceae 1:g__Anoxybacillus
Antarctobacter	12	11	0	0	0	0	0	1	0	0	0	p__"Proteobacteria":c__Alphaproteobacteria:o__Rhodobacterales:f__Rhodobacteraceae:g__Antarctobacter
Aquabacter	1	1	0	0	0	0	0	0	0	1	0	p__Nitrospinae:c__Fimbriimonadia:o__Fimbriimonadales:f__Fimbriimonadaceae:g__Aquabacter
Aquabacterium	3	3	0	0	0	0	0	0	0	0	0	p__"Proteobacteria":c__Betaproteobacteria:o__Burkholderiales:f__Burkholderiales_incertae_sedis:g__Aquabacterium
Aquamicrobium	1	1	0	0	0	0	0	0	0	0	0	p__"Proteobacteria":c__Alphaproteobacteria:o__Rhizobiales:f__Phyllobacteriaceae:g__Aquamicrobium
Aquaspirillum	13	11	0	5	7	2	0	4	0	2	0	p__"Proteobacteria":c__Betaproteobacteria:o__Neisseriales:f__Neisseriaceae:g__Aquaspirillum
Aquifex	4	4	0	1	1	4	0	4	1	1	1	p__"Aquificae":c__Aquificae:o__Aquificales:f__Aquificaceae:g__Aquifex
Aquimarina	26	25	0	10	12	24	0	0	0	3	0	p__"Bacteroidetes":c__Flavobacteriia:o__"Flavobacteriales":f__Flavobacteriaceae:g__Aquimarina
Aquimonas	2	1	0	1	1	1	0	0	0	0	0	p__"Proteobacteria":c__Gammaproteobacteria:o__Xanthomonadales:f__Xanthomonadaceae:g__Aquimonas
Aquincola	3	2	0	0	2	0	0	0	0	0	0	p__"Proteobacteria":c__Betaproteobacteria:o__Burkholderiales:f__Burkholderiales_incertae_sedis:g__Aquincola
Aquisalibacillus	1	1	0	1	1	1	0	0	0	0	0	p__Firmicutes:c__Erysipelotrichia:o__Erysipelotrichales:f__Erysipelotrichaceae:g__Aquisalibacillus
Aquisalimonas	5	5	0	0	0	5	0	0	0	0	0	p__"Proteobacteria":c__Gammaproteobacteria:o__Chromatiales:f__Ectothiorhodospiraceae:g__Aquisalimonas
Aquisphaera	2	2	0	2	0	2	0	0	2	2	0	p__Nitrospinae:c__Fimbriimonadia:o__Fimbriimonadales:f__Mooreiaceae:g__Aquisphaera
Aquitalea	14	14	0	11	7	4	0	7	0	0	0	p__"Proteobacteria":c__Betaproteobacteria:o__Neisseriales:f__Neisseriaceae:g__Aquitalea
Arcanobacterium	15	10	0	1	0	9	0	0	9	9	0	p__"Actinobacteria":c__Actinobacteria:o__Actinomycetales:f__Actinomycetaceae:g__Arcanobacterium
Arcobacter	63	63	0	44	0	57	0	56	53	58	0	p__"Proteobacteria":c__Epsilonproteobacteria:o__Campylobacterales:f__Campylobacteraceae:g__Arcobacter
Ardenticatena	1	1	0	1	0	1	0	1	0	0	0	p__Nitrospinae:c__Ardenticatenia:o__Ardenticatenales:f__Ardenticatenaceae:g__Ardenticatena
Arenibacter	29	29	0	12	29	11	0	0	0	0	0	p__"Bacteroidetes":c__Flavobacteriia:o__"Flavobacteriales":f__Flavobacteriaceae:g__Arenibacter
Arenimonas	9	7	0	0	4	3	0	2	0	1	0	p__"Proteobacteria":c__Gammaproteobacteria:o__Xanthomonadales:f__Xanthomonadaceae:g__Arenimonas
Arhodomonas	7	6	0	6	1	6	0	0	6	2	0	p__"Proteobacteria":c__Gammaproteobacteria:o__Chromatiales:f__Ectothiorhodospiraceae:g__Arhodomonas
Arsenicicoccus	6	5	0	5	0	5	0	0	0	0	0	p__"Actinobacteria":c__Actinobacteria:o__Actinomycetales:f__Intrasporangiaceae:g__Arsenicicoccus
Arsenophonus	49	45	0	36	3	31	0	1	0	32	0	p__"Proteobacteria":c__Gammaproteobacteria:o__"Enterobacteriales":f__Enterobacteriaceae:g__Arsenophonus
Arthrobacter	1299	1273	0	527	0	747	0	608	0	948	0	p__"Actinobacteria":c__Actinobacteria:o__Actinomycetales:f__Micrococcaceae:g__Arthrobacter
Asaia	133	133	0	0	0	133	0	127	132	133	0	p__"Proteobacteria":c__Alphaproteobacteria:o__Rhodospirillales:f__Acetobacteraceae:g__Asaia
Asteroleplasma	1	1	0	1	1	1	0	0	0	1	0	p__"Tenericutes":c__Mollicutes:o__Anaeroplasmatales:f__Anaeroplasmataceae:g__Asteroleplasma
Asticcacaulis	16	14	0	0	0	0	0	0	13	0	0	p__"Proteobacteria":c__Alphaproteobacteria:o__Caulobacterales:f__Caulobacteraceae:g__Asticcacaulis
Atopobium	25	24	0	19	0	24	0	0	22	12	0	p__"Actinobacteria":c__Actinobacteria:o__Coriobacteriales:f__Coriobacteriaceae:g__Atopobium
Atopococcus	1	1	0	1	1	0	0	0	0	0	0	p__Firmicutes:c__Bacilli:o__Lactobacillales:f__Carnobacteriaceae:g__Atopococcus
Atopostipes	1	1	0	1	1	1	0	1	0	1	0	p__Firmicutes:c__Bacilli:o__Lactobacillales:f__Carnobacteriaceae:g__Atopostipes
Aurantimonas	35	23	0	0	0	10	0	15	0	3	0	p__"Proteobacteria":c__Alphaproteobacteria:o__Rhizobiales:f__"Aurantimonadaceae":g__Aurantimonas
Auraticoccus	1	1	0	1	0	1	0	0	0	1	0	p__"Actinobacteria":c__Actinobacteria:o__Actinomycetales:f__Propionibacteriaceae:g__Auraticoccus
Aureimonas	15	5	0	0	0	2	0	3	0	4	0	p__Nitrospinae:c__Thermoflexia:o__Candidatus Brocadiales:f__Candidatus Brocadiaceae:g__Aureimonas
Aureispira	3	3	0	3	3	3	0	3	3	3	0	p__"Bacteroidetes":c__Sphingobacteriia:o__"Sphingobacteriales":f__"Saprospiraceae":g__Aureispira
Auritidibacter	5	5	0	5	0	5	0	1	0	0	0	p__"Actinobacteria":c__Actinobacteria:o__Actinomycetales:f__Micrococcaceae:g__Auritidibacter
Austwickia	2	2	0	2	0	2	0	0	0	0	0	p__"Actinobacteria":c__Actinobacteria:o__Actinomycetales:f__Dermatophilaceae:g__Austwickia
Avibacterium	13	11	0	6	6	10	0	8	7	7	0	p__"Proteobacteria":c__Gammaproteobacteria:o__Pasteurellales:f__Pasteurellaceae:g__Avibacterium
Azoarcus	53	51	0	27	23	42	0	28	18	26	0	p__"Proteobacteria":c__Betaproteobacteria:o__Rhodocyclales:f__Rhodocyclaceae:g__Azoarcus
Azohydromonas	5	5	0	3	2	0	0	4	0	2	0	p__"Proteobacteria":c__Betaproteobacteria:o__Burkholderiales:f__Alcaligenaceae:g__Azohydromonas
Azomonas	6	3	0	1	3	3	0	0	0	0	0	p__"Proteobacteria":c__Gammaproteobacteria:o__Pseudomonadales:f__Pseudomonadaceae:g__Azomonas
Azonexus	6	6	0	2	5	6	0	3	0	0	0	p__"Proteobacteria":c__Betaproteobacteria:o__Rhodocyclales:f__Rhodocyclaceae:g__Azonexus
Azospira	12	11	0	10	11	11	0	11	1	0	0	p__"Proteobacteria":c__Betaproteobacteria:o__Rhodocyclales:f__Rhodocyclaceae:g__Azospira
Azospirillum	220	208	0	8	0	184	0	81	186	156	0	p__"Proteobacteria":c__Alphaproteobacteria:o__Rhodospirillales:f__Rhodospirillaceae:g__Azospirillum
Azotobacter	71	65	0	17	30	25	0	36	45	12	0	p__"Proteobacteria":c__Gammaproteobacteria:o__Pseudomonadales:f__Pseudomonadaceae:g__Azotobacter
Azovibrio	5	5	0	5	4	0	0	5	0	0	0	p__"Proteobacteria":c__Betaproteobacteria:o__Rhodocyclales:f__Rhodocyclaceae:g__Azovibrio
Bacillus	10873	10248	0	5616	2432	0	0	2646	0	4245	0	p__Firmicutes:c__Bacilli:o__Bacillales:f__Bacillaceae 1:g__Bacillus
Bacteriovorax	21	19	0	7	8	13	0	7	0	7	0	p__"Proteobacteria":c__Deltaproteobacteria:o__Bdellovibrionales:f__Bacteriovoracaceae:g__Bacteriovorax
Bacteroides	26	22	0	16	12	21	0	0	21	19	0	p__"Bacteroidetes":c__"Bacteroidia":o__"Bacteroidales":f__Bacteroidaceae:g__Bacteroides
Balneimonas	6	0	0	0	0	0	0	0	0	0	0	P__"Proteobacteria":C__Alphaproteobacteria:O__Rhizobiales:F__Bradyrhizobiaceae:G__Balneimonas
Balneola	1	1	0	1	1	1	0	1	1	1	0	p__"Bacteroidetes":c__Sphingobacteriia:o__"Sphingobacteriales":f__Chitinophagaceae:g__Balneola
Bartonella	144	141	0	7	0	137	0	113	0	1	0	p__"Proteobacteria":c__Alphaproteobacteria:o__Rhizobiales:f__Bartonellaceae:g__Bartonella
Bauldia	2	2	0	0	0	1	0	2	0	2	0	p__"Proteobacteria":c__Alphaproteobacteria:o__Rhizobiales:f__Rhizobiales_incertae_sedis:g__Bauldia
Bdellovibrio	23	15	0	9	0	10	0	10	0	10	0	p__"Proteobacteria":c__Deltaproteobacteria:o__Bdellovibrionales:f__Bdellovibrionaceae:g__Bdellovibrio
Beggiatoa	16	7	0	4	4	6	0	0	5	1	0	p__"Proteobacteria":c__Gammaproteobacteria:o__Thiotrichales:f__Thiotrichaceae:g__Beggiatoa
Beijerinckia	29	28	0	0	0	22	0	26	0	23	1	p__"Proteobacteria":c__Alphaproteobacteria:o__Rhizobiales:f__Beijerinckiaceae:g__Beijerinckia
Belliella	6	6	0	6	0	6	0	0	6	0	0	p__"Bacteroidetes":c__Sphingobacteriia:o__"Sphingobacteriales":f__Cyclobacteriaceae:g__Belliella
Bellilinea	1	1	0	1	0	1	0	1	0	1	0	p__"Chloroflexi":c__Anaerolineae:o__Anaerolineales:f__Anaerolineaceae:g__Bellilinea
Belnapia	3	3	0	2	0	2	0	3	0	3	0	p__"Proteobacteria":c__Alphaproteobacteria:o__Rhodospirillales:f__Acetobacteraceae:g__Belnapia
Bergeriella	4	4	0	4	3	4	0	0	0	0	0	p__"Proteobacteria":c__Betaproteobacteria:o__Neisseriales:f__Neisseriaceae:g__Bergeriella
Bermanella	1	1	0	0	1	1	0	0	0	1	0	p__"Proteobacteria":c__Gammaproteobacteria:o__Oceanospirillales:f__Oceanospirillaceae:g__Bermanella
Bhargavaea	16	16	0	15	7	0	0	11	0	0	0	p__Firmicutes:c__Erysipelotrichia:o__Erysipelotrichales:f__Bacillales_incertae_sedis:g__Bhargavaea
Bibersteinia	27	2	0	0	27	0	0	4	0	27	0	p__"Proteobacteria":c__Gammaproteobacteria:o__Pasteurellales:f__Pasteurellaceae:g__Bibersteinia
Bifidobacterium	371	370	0	320	79	361	0	187	253	333	16	p__"Actinobacteria":c__Actinobacteria:o__Bifidobacteriales:f__Bifidobacteriaceae:g__Bifidobacterium
Bilophila	2	2	0	2	2	2	0	1	2	2	0	p__"Proteobacteria":c__Deltaproteobacteria:o__Desulfovibrionales:f__Desulfovibrionaceae:g__Bilophila
Bizionia	14	12	0	7	6	4	0	0	8	0	0	p__"Bacteroidetes":c__Flavobacteriia:o__"Flavobacteriales":f__Flavobacteriaceae:g__Bizionia
Blastochloris	15	15	0	0	0	14	0	9	0	14	0	p__"Proteobacteria":c__Alphaproteobacteria:o__Rhizobiales:f__Hyphomicrobiaceae:g__Blastochloris
Blastomonas	10	9	0	0	0	8	0	6	0	9	0	p__"Proteobacteria":c__Alphaproteobacteria:o__Sphingomonadales:f__Sphingomonadaceae:g__Blastomonas
Blastopirellula	3	3	0	1	0	2	0	3	1	2	0	p__"Planctomycetes":c__Planctomycetia:o__Planctomycetales:f__Planctomycetaceae:g__Blastopirellula
Blautia	22	17	0	11	0	16	0	2	6	11	0	p__Firmicutes:c__Erysipelotrichia:o__Erysipelotrichales:f__Bacillales_incertae_sedis:g__Blautia
Bogoriella	1	1	0	1	0	0	0	1	0	0	0	p__"Actinobacteria":c__Actinobacteria:o__Actinomycetales:f__Bogoriellaceae:g__Bogoriella
Bordetella	129	122	0	115	90	87	0	97	0	0	0	p__"Proteobacteria":c__Betaproteobacteria:o__Burkholderiales:f__Alcaligenaceae:g__Bordetella
Borrelia	240	240	0	239	239	238	0	228	232	239	0	p__"Spirochaetes":c__Spirochaetia:o__Spirochaetales:f__Spirochaetaceae:g__Borrelia
Bosea	53	51	0	0	0	51	0	44	43	21	0	p__"Proteobacteria":c__Alphaproteobacteria:o__Rhizobiales:f__Bradyrhizobiaceae:g__Bosea
Bowmanella	3	3	0	2	1	2	0	2	0	3	0	p__"Proteobacteria":c__Gammaproteobacteria:o__Alteromonadales:f__Alteromonadaceae:g__Bowmanella
Brachybacterium	84	84	0	47	0	76	0	0	0	54	0	p__"Actinobacteria":c__Actinobacteria:o__Actinomycetales:f__Dermabacteraceae:g__Brachybacterium
Brachymonas	7	7	0	2	1	3	0	1	0	4	0	p__"Proteobacteria":c__Betaproteobacteria:o__Burkholderiales:f__Comamonadaceae:g__Brachymonas
Brachyspira	4	4	0	4	0	4	0	4	4	4	0	p__"Spirochaetes":c__Spirochaetia:o__Spirochaetales:f__"Brachyspiraceae":g__Brachyspira
Brackiella	1	1	0	1	1	1	0	1	0	1	0	p__"Proteobacteria":c__Betaproteobacteria:o__Burkholderiales:f__Alcaligenaceae:g__Brackiella
Bradyrhizobium	1133	1120	0	0	0	999	0	338	1085	850	0	p__"Proteobacteria":c__Alphaproteobacteria:o__Rhizobiales:f__Bradyrhizobiaceae:g__Bradyrhizobium
Branchiibius	1	1	0	1	0	0	0	0	0	1	1	p__"Actinobacteria":c__Actinobacteria:o__Actinomycetales:f__Dermacoccaceae:g__Branchiibius
Brassicibacter	1	1	0	1	0	1	0	1	0	1	0	p__Nitrospinae:c__Thermoflexia:o__Candidatus Brocadiales:f__Candidatus Brocadiaceae:g__Brassicibacter
Brenneria	14	13	0	0	8	0	0	0	0	2	0	p__"Proteobacteria":c__Gammaproteobacteria:o__"Enterobacteriales":f__Enterobacteriaceae:g__Brenneria
Brevibacillus	287	284	0	240	232	277	0	211	273	279	0	p__Firmicutes:c__Bacilli:o__Bacillales:f__Paenibacillaceae 1:g__Brevibacillus
Brevibacterium	13	1	0	0	0	1	0	1	1	1	0	p__"Actinobacteria":c__Actinobacteria:o__Actinomycetales:f__Brevibacteriaceae:g__Brevibacterium
Brevundimonas	307	303	0	0	0	194	0	250	290	0	0	p__"Proteobacteria":c__Alphaproteobacteria:o__Caulobacterales:f__Caulobacteraceae:g__Brevundimonas
Brochothrix	12	12	0	12	12	0	0	0	1	11	0	p__Firmicutes:c__Bacilli:o__Bacillales:f__Listeriaceae:g__Brochothrix
Brooklawnia	2	1	0	1	0	1	0	0	0	1	0	p__"Actinobacteria":c__Actinobacteria:o__Actinomycetales:f__Propionibacteriaceae:g__Brooklawnia
Brucella	275	256	0	0	0	0	0	258	0	0	0	p__"Proteobacteria":c__Alphaproteobacteria:o__Rhizobiales:f__Brucellaceae:g__Brucella
Brumimicrobium	1	1	0	1	1	1	0	0	1	1	0	p__"Bacteroidetes":c__Flavobacteriia:o__"Flavobacteriales":f__Cryomorphaceae:g__Brumimicrobium
Buchnera	119	117	0	39	33	39	0	26	47	56	2	p__Nitrospinae:c__Fimbriimonadia:o__Magnetococcales:f__SAR11:g__Buchnera
Budvicia	3	3	0	3	1	0	0	1	0	3	0	p__"Proteobacteria":c__Gammaproteobacteria:o__"Enterobacteriales":f__Enterobacteriaceae:g__Budvicia
Bulleidia	5	1	0	1	1	1	0	0	0	1	0	p__Firmicutes:c__Erysipelotrichia:o__Erysipelotrichales:f__Erysipelotrichaceae:g__Bulleidia
Burkholderia	520	502	0	287	124	430	0	101	376	1	0	p__"Proteobacteria":c__Betaproteobacteria:o__Burkholderiales:f__Burkholderiaceae:g__Burkholderia
Buttiauxella	18	18	0	0	10	0	0	0	0	0	0	p__"Proteobacteria":c__Gammaproteobacteria:o__"Enterobacteriales":f__Enterobacteriaceae:g__Buttiauxella
Butyricicoccus	1	1	0	1	0	1	0	0	1	1	0	p__Firmicutes:c__Erysipelotrichia:o__Erysipelotrichales:f__Bacillales_incertae_sedis:g__Butyricicoccus
Butyricimonas	1	1	0	1	1	1	0	1	1	1	0	p__"Bacteroidetes":c__"Bacteroidia":o__"Bacteroidales":f__"Porphyromonadaceae":g__Butyricimonas
Butyrivibrio	55	26	0	3	5	24	0	2	25	0	0	p__Firmicutes:c__Clostridia:o__Clostridiales:f__Lachnospiraceae:g__Butyrivibrio
Byssovorax	1	1	0	1	1	1	0	1	0	1	0	p__"Proteobacteria":c__Deltaproteobacteria:o__Myxococcales:f__Polyangiaceae:g__Byssovorax
Caedibacter	4	4	0	2	1	4	0	4	1	4	0	p__"Proteobacteria":c__Gammaproteobacteria:o__Thiotrichales:f__Thiotrichales_incertae_sedis:g__Caedibacter
Caenimonas	2	2	0	0	1	0	0	0	0	2	0	p__"Proteobacteria":c__Betaproteobacteria:o__Burkholderiales:f__Comamonadaceae:g__Caenimonas
Caenispirillum	3	3	0	0	0	3	0	2	0	3	0	p__"Proteobacteria":c__Alphaproteobacteria:o__Rhodospirillales:f__Rhodospirillaceae:g__Caenispirillum
Caldalkalibacillus	1	1	0	1	1	1	0	1	0	0	0	p__Firmicutes:c__Erysipelotrichia:o__Erysipelotrichales:f__Bacillales_incertae_sedis:g__Caldalkalibacillus
Caldanaerobacter	9	8	0	7	1	8	0	3	8	6	0	p__Firmicutes:c__Clostridia:o__Thermoanaerobacterales:f__Thermoanaerobacteraceae:g__Caldanaerobacter
Caldanaerobius	1	1	0	1	0	1	0	1	0	1	0	p__Firmicutes:c__Erysipelotrichia:o__Natranaerobiales:f__Natranaerobiaceae:g__Caldanaerobius
Caldicoprobacter	3	3	0	3	0	3	0	2	2	2	0	p__Firmicutes:c__Clostridia:o__Clostridiales:f__Clostridiales_Incertae Sedis IV:g__Caldicoprobacter
Caldilinea	3	3	0	3	0	3	0	0	0	3	0	p__"Chloroflexi":c__Caldilineae:o__Caldilineales:f__Caldilineaceae:g__Caldilinea
Caldimonas	5	5	0	0	5	0	0	5	0	0	0	p__"Proteobacteria":c__Betaproteobacteria:o__Burkholderiales:f__Comamonadaceae:g__Caldimonas
Caldisericum	2	2	0	2	2	2	0	2	2	2	0	p__"Caldiserica":c__Caldisericia:o__Caldisericales:f__Caldisericaceae:g__Caldisericum
Calditerricola	5	5	0	5	5	5	0	5	1	0	0	p__Firmicutes:c__Erysipelotrichia:o__Erysipelotrichales:f__Bacillales_incertae_sedis:g__Calditerricola
Calditerrivibrio	1	1	0	1	1	1	0	1	1	0	0	p__"Deferribacteres":c__Deferribacteres:o__Deferribacterales:f__Deferribacteraceae:g__Calditerrivibrio
Caldithrix	3	3	0	3	3	3	0	3	3	3	0	p__"Deferribacteres":c__Deferribacteres:o__Deferribacterales:f__Deferribacterales_incertae_sedis:g__Caldithrix
Caloramator	26	24	0	6	0	22	0	7	4	7	0	p__Firmicutes:c__Clostridia:o__Clostridiales:f__Clostridiaceae 1:g__Caloramator
Caloranaerobacter	2	2	0	2	0	2	0	2	1	0	0	p__Firmicutes:c__Clostridia:o__Clostridiales:f__Clostridiaceae 3:g__Caloranaerobacter
Caloribacterium	1	1	0	1	0	1	0	1	1	1	0	p__Nitrospinae:c__Fimbriimonadia:o__Fimbriimonadales:f__Fimbriimonadaceae:g__Caloribacterium
Camelimonas	2	2	0	0	0	1	0	2	2	2	0	p__"Proteobacteria":c__Alphaproteobacteria:o__Rhizobiales:f__Beijerinckiaceae:g__Camelimonas
Caminibacter	2	2	0	2	0	2	0	2	2	2	0	p__"Proteobacteria":c__Epsilonproteobacteria:o__Nautiliales:f__Nautiliaceae:g__Caminibacter
Caminicella	1	1	0	1	0	1	0	1	1	1	0	p__Firmicutes:c__Clostridia:o__Clostridiales:f__Clostridiaceae 4:g__Caminicella
Campylobacter	384	383	0	362	0	379	0	361	336	371	0	p__"Proteobacteria":c__Epsilonproteobacteria:o__Campylobacterales:f__Campylobacteraceae:g__Campylobacter
Candidimonas	1	1	0	0	1	0	0	1	0	0	0	p__Nitrospinae:c__Fimbriimonadia:o__Magnetococcales:f__SAR11:g__Candidimonas
Capnocytophaga	36	34	0	28	4	32	0	0	11	28	0	p__"Bacteroidetes":c__Flavobacteriia:o__"Flavobacteriales":f__Flavobacteriaceae:g__Capnocytophaga
Carboxydocella	3	3	0	2	2	3	0	1	1	0	0	p__Firmicutes:c__Clostridia:o__Clostridiales:f__Clostridiales_Incertae Sedis XVI:g__Carboxydocella
Carboxydothermus	8	8	0	4	4	4	0	4	4	4	0	p__Firmicutes:c__Clostridia:o__Thermoanaerobacterales:f__Thermoanaerobacteraceae:g__Carboxydothermus
Cardiobacterium	12	9	0	7	1	3	0	0	6	7	0	p__"Proteobacteria":c__Gammaproteobacteria:o__Cardiobacteriales:f__Cardiobacteriaceae:g__Cardiobacterium
Carnimonas	1	1	0	0	1	0	0	0	0	1	0	p__"Proteobacteria":c__Gammaproteobacteria:o__Oceanospirillales:f__Halomonadaceae:g__Carnimonas
Carnobacterium	76	75	0	74	70	20	0	0	34	73	0	p__Firmicutes:c__Bacilli:o__Lactobacillales:f__Carnobacteriaceae:g__Carnobacterium
Caryophanon	9	5	0	5	3	0	0	3	0	4	0	p__Firmicutes:c__Bacilli:o__Bacillales:f__Planococcaceae:g__Caryophanon
Castellaniella	26	26	0	23	16	26	0	0	0	26	0	p__"Proteobacteria":c__Betaproteobacteria:o__Burkholderiales:f__Alcaligenaceae:g__Castellaniella
Catellibacterium	4	1	0	0	0	0	0	0	0	0	0	p__"Proteobacteria":c__Alphaproteobacteria:o__Rhodobacterales:f__Rhodobacteraceae:g__Catellibacterium
Catellicoccus	1	1	0	1	1	0	0	0	0	1	0	p__Firmicutes:c__Bacilli:o__Lactobacillales:f__Carnobacteriaceae:g__Catellicoccus
Catenibacterium	1	1	0	1	1	1	0	0	1	0	0	p__Firmicutes:c__Erysipelotrichia:o__Erysipelotrichales:f__Erysipelotrichaceae:g__Catenibacterium
Catenovulum	2	2	0	1	0	1	0	0	0	1	0	p__Nitrospinae:c__Fimbriimonadia:o__Fimbriimonadales:f__Defluviitaleaceae:g__Catenovulum
Catonella	12	12	0	1	0	2	0	1	1	0	0	p__Firmicutes:c__Clostridia:o__Clostridiales:f__Lachnospiraceae:g__Catonella
Caulobacter	94	76	0	0	0	70	0	43	66	66	0	p__"Proteobacteria":c__Alphaproteobacteria:o__Caulobacterales:f__Caulobacteraceae:g__Caulobacter
Celeribacter	5	1	0	0	0	0	0	0	3	0	0	p__"Proteobacteria":c__Alphaproteobacteria:o__Rhodobacterales:f__Rhodobacteraceae:g__Celeribacter
Cellulomonas	125	98	0	49	0	66	0	0	0	0	0	p__"Actinobacteria":c__Actinobacteria:o__Actinomycetales:f__Cellulomonadaceae:g__Cellulomonas
Cellulophaga	53	51	0	27	0	24	0	0	1	10	0	p__"Bacteroidetes":c__Flavobacteriia:o__"Flavobacteriales":f__Flavobacteriaceae:g__Cellulophaga
Cellulosilyticum	14	1	0	1	0	1	0	1	1	1	0	p__Firmicutes:c__Erysipelotrichia:o__Erysipelotrichales:f__Bacillales_incertae_sedis:g__Cellulosilyticum
Cellulosimicrobium	67	63	0	20	0	61	0	0	0	0	0	p__"Actinobacteria":c__Actinobacteria:o__Actinomycetales:f__Promicromonosporaceae:g__Cellulosimicrobium
Cellvibrio	25	24	0	18	16	24	0	0	0	15	0	p__"Proteobacteria":c__Gammaproteobacteria:o__Pseudomonadales:f__Pseudomonadaceae:g__Cellvibrio
Centipeda	2	1	0	1	0	0	0	1	2	1	0	p__Firmicutes:c__Clostridia:o__Clostridiales:f__Veillonellaceae:g__Centipeda
Cerasibacillus	2	2	0	2	0	0	0	2	0	2	0	p__Firmicutes:c__Bacilli:o__Bacillales:f__Bacillaceae 2:g__Cerasibacillus
Cerasicoccus	4	4	0	4	4	4	0	4	1	1	0	p__"Verrucomicrobia":c__Opitutae:o__Puniceicoccales:f__Puniceicoccaceae:g__Cerasicoccus
Cetobacterium	5	5	0	5	0	5	0	5	5	5	0	p__"Fusobacteria":c__Fusobacteriia:o__"Fusobacteriales":f__"Fusobacteriaceae":g__Cetobacterium
Chelatococcus	20	18	0	0	0	13	0	7	0	0	0	p__"Proteobacteria":c__Alphaproteobacteria:o__Rhizobiales:f__Beijerinckiaceae:g__Chelatococcus
Chitinibacter	1	1	0	1	1	1	0	0	0	1	0	p__"Proteobacteria":c__Betaproteobacteria:o__Neisseriales:f__Neisseriaceae:g__Chitinibacter
Chitinilyticum	1	1	0	1	0	1	0	0	0	0	0	p__"Proteobacteria":c__Betaproteobacteria:o__Neisseriales:f__Neisseriaceae:g__Chitinilyticum
Chitinimonas	6	6	0	5	5	5	0	5	0	0	0	p__"Proteobacteria":c__Betaproteobacteria:o__Burkholderiales:f__Burkholderiaceae:g__Chitinimonas
Chitiniphilus	1	0	0	0	0	0	0	0	0	0	0	p__"Proteobacteria":c__Betaproteobacteria:o__Neisseriales:f__Neisseriaceae:g__Chitiniphilus
Chitinivibrio	1	1	0	0	1	1	0	1	0	1	0	p__Nitrospinae:c__Chitinivibrionia:o__Chitinivibrionales:f__Chitinivibrionaceae:g__Chitinivibrio
Chlamydophila	47	47	0	47	47	47	0	44	2	46	0	p__"Chlamydiae":c__Chlamydiia:o__Chlamydiales:f__Chlamydiaceae:g__Chlamydophila
Chlorobium	7	3	0	2	0	2	0	0	2	1	0	p__"Chlorobi":c__"Chlorobia":o__Chlorobiales:f__Chlorobiaceae:g__Chlorobium
Chloroflexus	11	11	0	3	0	11	0	0	0	9	0	p__"Chloroflexi":c__Chloroflexia:o__"Chloroflexales":f__Chloroflexaceae:g__Chloroflexus
Chondromyces	12	7	0	7	5	5	0	4	0	3	0	p__"Proteobacteria":c__Deltaproteobacteria:o__Myxococcales:f__Polyangiaceae:g__Chondromyces
Chromatium	5	1	0	1	1	1	0	1	0	0	0	p__"Proteobacteria":c__Gammaproteobacteria:o__Chromatiales:f__Chromatiaceae:g__Chromatium
Chromobacterium	70	69	0	67	66	67	0	28	0	0	0	p__"Proteobacteria":c__Betaproteobacteria:o__Neisseriales:f__Neisseriaceae:g__Chromobacterium
Chromohalobacter	54	47	0	45	43	44	0	47	43	16	1	p__"Proteobacteria":c__Gammaproteobacteria:o__Oceanospirillales:f__Halomonadaceae:g__Chromohalobacter
Chryseobacterium	160	156	0	111	101	147	0	0	20	80	0	p__"Bacteroidetes":c__Flavobacteriia:o__"Flavobacteriales":f__Flavobacteriaceae:g__Chryseobacterium
Chryseoglobus	1	1	0	1	0	0	0	0	0	0	0	p__"Actinobacteria":c__Actinobacteria:o__Actinomycetales:f__Microbacteriaceae:g__Chryseoglobus
Chryseomicrobium	4	4	0	2	3	0	0	3	0	4	0	p__Nitrospinae:c__Fimbriimonadia:o__Fimbriimonadales:f__Defluviitaleaceae:g__Chryseomicrobium
Chrysiogenes	2	2	0	2	2	0	0	2	0	2	0	p__"Chrysiogenetes":c__Chrysiogenetes:o__Chrysiogenales:f__Chrysiogenaceae:g__Chrysiogenes
Citreicella	4	3	0	0	0	3	0	0	3	0	0	p__"Proteobacteria":c__Alphaproteobacteria:o__Rhodobacterales:f__Rhodobacteraceae:g__Citreicella
Citreimonas	1	1	0	0	0	0	0	0	0	0	0	p__"Proteobacteria":c__Alphaproteobacteria:o__Rhodobacterales:f__Rhodobacteraceae:g__Citreimonas
Citricoccus	21	14	0	13	0	1	0	13	0	0	0	p__"Actinobacteria":c__Actinobacteria:o__Actinomycetales:f__Micrococcaceae:g__Citricoccus
Citrobacter	199	156	0	0	9	0	0	0	0	0	0	p__"Proteobacteria":c__Gammaproteobacteria:o__"Enterobacteriales":f__Enterobacteriaceae:g__Citrobacter
Clavibacter	47	46	0	45	0	46	0	0	1	0	0	p__"Actinobacteria":c__Actinobacteria:o__Actinomycetales:f__Microbacteriaceae:g__Clavibacter
Cloacibacillus	1	1	0	0	0	1	0	0	1	0	0	p__"Synergistetes":c__Synergistia:o__Synergistales:f__Synergistaceae:g__Cloacibacillus
Cobetia	37	37	0	0	36	36	0	0	0	36	0	p__"Proteobacteria":c__Gammaproteobacteria:o__Oceanospirillales:f__Halomonadaceae:g__Cobetia
Coenonia	2	2	0	2	0	2	0	0	2	1	0	p__"Bacteroidetes":c__Flavobacteriia:o__"Flavobacteriales":f__Flavobacteriaceae:g__Coenonia
Cohaesibacter	2	2	0	0	0	0	0	1	0	2	0	p__"Proteobacteria":c__Alphaproteobacteria:o__Rhizobiales:f__Cohaesibacteraceae:g__Cohaesibacter
Cohnella	37	36	0	19	23	36	0	12	1	19	0	p__Firmicutes:c__Bacilli:o__Bacillales:f__Paenibacillaceae 1:g__Cohnella
Collimonas	41	40	0	20	5	22	0	29	0	0	0	p__"Proteobacteria":c__Betaproteobacteria:o__Burkholderiales:f__Oxalobacteraceae:g__Collimonas
Collinsella	1	1	0	1	0	1	0	0	1	0	0	p__"Actinobacteria":c__Actinobacteria:o__Coriobacteriales:f__Coriobacteriaceae:g__Collinsella
Colwellia	125	124	0	67	10	99	0	107	110	110	0	p__"Proteobacteria":c__Gammaproteobacteria:o__Alteromonadales:f__Colwelliaceae:g__Colwellia
Comamonas	201	181	0	127	114	81	0	1	0	0	0	p__"Proteobacteria":c__Betaproteobacteria:o__Burkholderiales:f__Comamonadaceae:g__Comamonas
Conchiformibius	14	14	0	9	6	0	0	8	14	3	0	p__"Proteobacteria":c__Betaproteobacteria:o__Neisseriales:f__Neisseriaceae:g__Conchiformibius
Coprobacillus	3	3	0	3	3	3	0	0	0	2	0	p__Firmicutes:c__Erysipelotrichia:o__Erysipelotrichales:f__Erysipelotrichaceae:g__Coprobacillus
Coprococcus	3	3	0	1	0	3	0	2	2	2	0	p__Firmicutes:c__Clostridia:o__Clostridiales:f__Lachnospiraceae:g__Coprococcus
Coprothermobacter	8	7	0	7	0	7	0	2	7	7	0	p__Firmicutes:c__Clostridia:o__Thermoanaerobacterales:f__Thermodesulfobiaceae:g__Coprothermobacter
Coraliomargarita	2	2	0	2	2	2	0	2	2	2	0	p__"Verrucomicrobia":c__Opitutae:o__Puniceicoccales:f__Puniceicoccaceae:g__Coraliomargarita
Corallibacter	1	1	0	1	0	0	0	0	0	0	0	p__Nitrospinae:c__Fimbriimonadia:o__Fimbriimonadales:f__Defluviitaleaceae:g__Corallibacter
Corallococcus	68	58	0	19	34	51	0	52	0	51	0	p__"Proteobacteria":c__Deltaproteobacteria:o__Myxococcales:f__Myxococcaceae:g__Corallococcus
Coriobacterium	2	2	0	2	0	2	0	0	2	0	0	p__"Actinobacteria":c__Actinobacteria:o__Coriobacteriales:f__Coriobacteriaceae:g__Coriobacterium
Corynebacterium	643	638	0	350	0	609	0	26	387	51	0	p__"Actinobacteria":c__Actinobacteria:o__Actinomycetales:f__Corynebacteriaceae:g__Corynebacterium
Costertonia	1	1	0	1	1	1	0	0	0	1	0	p__"Bacteroidetes":c__Flavobacteriia:o__"Flavobacteriales":f__Flavobacteriaceae:g__Costertonia
Coxiella	1	1	0	0	0	0	0	0	0	0	0	p__"Proteobacteria":c__Gammaproteobacteria:o__Legionellales:f__Coxiellaceae:g__Coxiella
Craurococcus	1	1	0	1	0	1	0	1	1	1	0	p__"Proteobacteria":c__Alphaproteobacteria:o__Rhodospirillales:f__Acetobacteraceae:g__Craurococcus
Croceibacter	4	4	0	4	0	4	0	0	0	4	0	p__"Bacteroidetes":c__Flavobacteriia:o__"Flavobacteriales":f__Flavobacteriaceae:g__Croceibacter
Croceicoccus	2	1	0	0	0	1	0	0	0	1	0	p__"Proteobacteria":c__Alphaproteobacteria:o__Sphingomonadales:f__Erythrobacteraceae:g__Croceicoccus
Crocinitomix	2	2	0	2	2	2	0	0	2	2	0	p__"Bacteroidetes":c__Flavobacteriia:o__"Flavobacteriales":f__Cryomorphaceae:g__Crocinitomix
Cronobacter	337	333	0	0	0	0	0	0	0	0	0	p__"Proteobacteria":c__Gammaproteobacteria:o__"Enterobacteriales":f__Enterobacteriaceae:g__Cronobacter
Cruoricaptor	1	1	0	1	1	1	0	0	1	1	0	p__Nitrospinae:c__Fimbriimonadia:o__Fimbriimonadales:f__Fimbriimonadaceae:g__Cruoricaptor
Cryobacterium	41	40	0	24	19	0	0	0	0	0	0	p__"Actinobacteria":c__Actinobacteria:o__Actinomycetales:f__Microbacteriaceae:g__Cryobacterium
Cryptanaerobacter	1	1	0	1	0	1	0	1	1	1	0	p__Firmicutes:c__Clostridia:o__Clostridiales:f__Peptococcaceae 2:g__Cryptanaerobacter
Cryptobacterium	4	4	0	4	0	4	0	0	0	4	0	p__"Actinobacteria":c__Actinobacteria:o__Coriobacteriales:f__Coriobacteriaceae:g__Cryptobacterium
Cryptosporangium	1	1	0	1	0	1	0	0	1	0	0	p__"Actinobacteria":c__Actinobacteria:o__Actinomycetales:f__Cryptosporangiaceae:g__Cryptosporangium
Cupriavidus	191	191	0	135	79	174	0	40	1	174	0	p__"Proteobacteria":c__Betaproteobacteria:o__Burkholderiales:f__Burkholderiaceae:g__Cupriavidus
Curtobacterium	178	168	0	139	0	0	0	0	0	0	0	p__"Actinobacteria":c__Actinobacteria:o__Actinomycetales:f__Microbacteriaceae:g__Curtobacterium
Curvibacter	15	14	0	12	11	0	0	6	0	0	0	p__"Proteobacteria":c__Betaproteobacteria:o__Burkholderiales:f__Comamonadaceae:g__Curvibacter
Cyclobacterium	2	2	0	2	0	1	0	0	2	2	0	p__"Bacteroidetes":c__Sphingobacteriia:o__"Sphingobacteriales":f__Cyclobacteriaceae:g__Cyclobacterium
Cycloclasticus	21	21	0	18	20	20	0	0	0	21	0	p__"Proteobacteria":c__Gammaproteobacteria:o__Thiotrichales:f__Piscirickettsiaceae:g__Cycloclasticus
Cystobacter	33	33	0	23	17	20	0	19	19	21	0	p__"Proteobacteria":c__Deltaproteobacteria:o__Myxococcales:f__Cystobacteraceae:g__Cystobacter
Daeguia	1	1	0	0	0	0	0	0	0	0	0	p__"Proteobacteria":c__Alphaproteobacteria:o__Rhizobiales:f__Brucellaceae:g__Daeguia
Dasania	2	2	0	1	2	2	0	1	0	1	0	p__"Proteobacteria":c__Gammaproteobacteria:o__Pseudomonadales:f__Pseudomonadales_incertae_sedis:g__Dasania
Dechloromonas	19	14	0	18	7	3	0	9	13	0	0	p__"Proteobacteria":c__Betaproteobacteria:o__Rhodocyclales:f__Rhodocyclaceae:g__Dechloromonas
Deefgea	6	6	0	2	5	6	0	2	0	0	0	p__"Proteobacteria":c__Betaproteobacteria:o__Neisseriales:f__Neisseriaceae:g__Deefgea
Deferribacter	3	3	0	3	3	3	0	3	3	3	1	p__"Deferribacteres":c__Deferribacteres:o__Deferribacterales:f__Deferribacteraceae:g__Deferribacter
Defluviicoccus	1	1	0	1	0	1	0	1	0	1	0	p__"Proteobacteria":c__Alphaproteobacteria:o__Rhodospirillales:f__Rhodospirillaceae:g__Defluviicoccus
Defluviitalea	2	2	0	1	0	2	0	0	1	1	0	p__Nitrospinae:c__Fimbriimonadia:o__Fimbriimonadales:f__Defluviitaleaceae:g__Defluviitalea
Dehalobacter	21	21	0	21	14	0	0	19	20	0	0	p__Firmicutes:c__Clostridia:o__Clostridiales:f__Peptococcaceae 1:g__Dehalobacter
Dehalococcoides	25	23	0	4	0	23	0	7	0	22	0	p__Nitrospinae:c__Dehalococcoidia:o__Dehalococcoidales:f__Dehalococcoidaceae:g__Dehalococcoides
Deinobacterium	1	1	0	1	1	1	0	1	1	1	0	p__"Deinococcus-Thermus":c__Deinococci:o__Deinococcales:f__Deinococcaceae:g__Deinobacterium
Deinococcus	141	139	0	100	106	130	0	11	28	95	0	p__"Deinococcus-Thermus":c__Deinococci:o__Deinococcales:f__Deinococcaceae:g__Deinococcus
Delftia	96	95	0	92	91	0	0	93	0	0	0	p__"Proteobacteria":c__Betaproteobacteria:o__Burkholderiales:f__Comamonadaceae:g__Delftia
Demequina	15	15	0	12	0	8	0	0	0	0	0	p__"Actinobacteria":c__Actinobacteria:o__Actinomycetales:f__Demequinaceae:g__Demequina
Demetria	1	1	0	1	0	0	0	0	0	0	0	p__"Actinobacteria":c__Actinobacteria:o__Actinomycetales:f__Dermacoccaceae:g__Demetria
Dendrosporobacter	2	2	0	2	2	2	0	2	0	2	0	p__Firmicutes:c__Clostridia:o__Clostridiales:f__Veillonellaceae:g__Dendrosporobacter
Denitratisoma	2	1	0	0	1	1	0	1	0	0	0	p__"Proteobacteria":c__Betaproteobacteria:o__Rhodocyclales:f__Rhodocyclaceae:g__Denitratisoma
Denitrobacterium	5	4	0	4	0	4	0	0	0	4	0	p__"Actinobacteria":c__Actinobacteria:o__Coriobacteriales:f__Coriobacteriaceae:g__Denitrobacterium
Denitrovibrio	1	1	0	1	1	1	0	1	1	1	0	p__"Deferribacteres":c__Deferribacteres:o__Deferribacterales:f__Deferribacteraceae:g__Denitrovibrio
Dermabacter	8	6	0	1	0	4	0	0	0	0	0	p__"Actinobacteria":c__Actinobacteria:o__Actinomycetales:f__Dermabacteraceae:g__Dermabacter
Dermacoccus	22	20	0	13	0	18	0	0	0	11	0	p__"Actinobacteria":c__Actinobacteria:o__Actinomycetales:f__Dermacoccaceae:g__Dermacoccus
Dermatophilus	5	4	0	4	0	0	0	0	0	0	0	p__"Actinobacteria":c__Actinobacteria:o__Actinomycetales:f__Dermatophilaceae:g__Dermatophilus
Derxia	4	4	0	3	2	4	0	4	0	0	0	p__"Proteobacteria":c__Betaproteobacteria:o__Burkholderiales:f__Alcaligenaceae:g__Derxia
Desemzia	4	4	0	3	0	2	0	0	0	0	0	p__Firmicutes:c__Bacilli:o__Lactobacillales:f__Carnobacteriaceae:g__Desemzia
Desulfacinum	2	2	0	2	2	2	0	1	1	0	0	p__"Proteobacteria":c__Deltaproteobacteria:o__Syntrophobacterales:f__Syntrophobacteraceae:g__Desulfacinum
Desulfarculus	2	2	0	2	2	2	0	0	2	2	0	p__"Proteobacteria":c__Deltaproteobacteria:o__Desulfarculales:f__Desulfarculaceae:g__Desulfarculus
Desulfatibacillum	4	4	0	4	4	4	0	4	4	4	0	p__"Proteobacteria":c__Deltaproteobacteria:o__Desulfobacterales:f__Desulfobacteraceae:g__Desulfatibacillum
Desulfatiferula	1	1	0	1	1	1	0	1	0	1	0	p__"Proteobacteria":c__Deltaproteobacteria:o__Desulfobacterales:f__Desulfobacteraceae:g__Desulfatiferula
Desulfatitalea	3	3	0	3	3	3	0	1	3	2	0	p__Nitrospinae:c__Fimbriimonadia:o__Fimbriimonadales:f__Defluviitaleaceae:g__Desulfatitalea
Desulfitobacterium	40	40	6	29	36	39	0	24	23	17	0	p__Firmicutes:c__Clostridia:o__Clostridiales:f__Peptococcaceae 1:g__Desulfitobacterium
Desulfobacca	1	1	0	1	1	1	0	1	0	0	0	p__"Proteobacteria":c__Deltaproteobacteria:o__Syntrophobacterales:f__Syntrophaceae:g__Desulfobacca
Desulfobacter	15	15	0	14	12	15	0	11	6	13	1	p__"Proteobacteria":c__Deltaproteobacteria:o__Desulfobacterales:f__Desulfobacteraceae:g__Desulfobacter
Desulfobacterium	16	16	0	10	6	13	0	5	6	9	0	p__"Proteobacteria":c__Deltaproteobacteria:o__Desulfobacterales:f__Desulfobacteraceae:g__Desulfobacterium
Desulfobacula	7	7	0	5	7	7	0	6	7	7	0	p__"Proteobacteria":c__Deltaproteobacteria:o__Desulfobacterales:f__Desulfobacteraceae:g__Desulfobacula
Desulfobotulus	2	2	0	2	2	2	0	2	2	2	0	p__"Proteobacteria":c__Deltaproteobacteria:o__Desulfobacterales:f__Desulfobacteraceae:g__Desulfobotulus
Desulfobulbus	13	13	0	7	7	9	0	8	8	6	0	p__"Proteobacteria":c__Deltaproteobacteria:o__Desulfobacterales:f__Desulfobulbaceae:g__Desulfobulbus
Desulfocapsa	5	5	0	5	5	5	0	5	0	4	0	p__"Proteobacteria":c__Deltaproteobacteria:o__Desulfobacterales:f__Desulfobulbaceae:g__Desulfocapsa
Desulfocella	2	2	0	1	1	1	0	1	2	1	0	p__"Proteobacteria":c__Deltaproteobacteria:o__Desulfobacterales:f__Desulfobacteraceae:g__Desulfocella
Desulfococcus	4	3	0	3	3	3	0	3	1	3	0	p__"Proteobacteria":c__Deltaproteobacteria:o__Desulfobacterales:f__Desulfobacteraceae:g__Desulfococcus
Desulfocurvus	3	3	0	3	3	3	0	2	2	3	0	p__"Proteobacteria":c__Deltaproteobacteria:o__Desulfovibrionales:f__Desulfovibrionaceae:g__Desulfocurvus
Desulfofaba	2	2	0	2	2	2	0	1	2	2	0	p__"Proteobacteria":c__Deltaproteobacteria:o__Desulfobacterales:f__Desulfobacteraceae:g__Desulfofaba
Desulfofrigus	3	3	0	3	3	1	0	3	3	3	0	p__"Proteobacteria":c__Deltaproteobacteria:o__Desulfobacterales:f__Desulfobacteraceae:g__Desulfofrigus
Desulfofustis	1	1	0	1	1	1	0	1	0	1	0	p__"Proteobacteria":c__Deltaproteobacteria:o__Desulfobacterales:f__Desulfobulbaceae:g__Desulfofustis
Desulfoglaeba	2	2	0	0	2	2	0	2	1	0	0	p__"Proteobacteria":c__Deltaproteobacteria:o__Syntrophobacterales:f__Syntrophobacteraceae:g__Desulfoglaeba
Desulfohalobium	4	4	0	4	4	3	0	4	3	4	0	p__"Proteobacteria":c__Deltaproteobacteria:o__Desulfovibrionales:f__Desulfohalobiaceae:g__Desulfohalobium
Desulfoluna	2	2	0	2	2	1	0	1	2	2	0	p__"Proteobacteria":c__Deltaproteobacteria:o__Desulfobacterales:f__Desulfobacteraceae:g__Desulfoluna
Desulfomicrobium	26	26	0	26	24	26	0	21	25	17	0	p__"Proteobacteria":c__Deltaproteobacteria:o__Desulfovibrionales:f__Desulfomicrobiaceae:g__Desulfomicrobium
Desulfomonile	4	4	0	4	4	4	0	0	2	4	0	p__"Proteobacteria":c__Deltaproteobacteria:o__Syntrophobacterales:f__Syntrophaceae:g__Desulfomonile
Desulfonatronovibrio	3	3	0	3	3	3	0	1	3	3	0	p__"Proteobacteria":c__Deltaproteobacteria:o__Desulfovibrionales:f__Desulfohalobiaceae:g__Desulfonatronovibrio
Desulfonatronum	10	10	0	9	8	9	0	9	7	8	0	p__"Proteobacteria":c__Deltaproteobacteria:o__Desulfovibrionales:f__Desulfonatronaceae:g__Desulfonatronum
Desulfonauticus	2	2	0	2	2	2	0	2	2	2	0	p__"Proteobacteria":c__Deltaproteobacteria:o__Desulfovibrionales:f__Desulfohalobiaceae:g__Desulfonauticus
Desulfonema	1	1	0	1	1	1	0	1	0	1	0	p__"Proteobacteria":c__Deltaproteobacteria:o__Desulfobacterales:f__Desulfobacteraceae:g__Desulfonema
Desulfonispora	1	1	0	1	1	1	0	1	0	1	0	p__Firmicutes:c__Clostridia:o__Clostridiales:f__Peptococcaceae 1:g__Desulfonispora
Desulfopila	2	2	0	2	2	2	0	2	0	2	0	p__"Proteobacteria":c__Deltaproteobacteria:o__Desulfobacterales:f__Desulfobulbaceae:g__Desulfopila
Desulforhabdus	1	1	0	0	0	0	0	0	0	0	0	p__"Proteobacteria":c__Deltaproteobacteria:o__Syntrophobacterales:f__Syntrophobacteraceae:g__Desulforhabdus
Desulforhopalus	3	3	0	3	3	3	0	3	1	2	1	p__"Proteobacteria":c__Deltaproteobacteria:o__Desulfobacterales:f__Desulfobulbaceae:g__Desulforhopalus
Desulfosalsimonas	1	1	0	1	1	1	0	1	1	1	0	p__"Proteobacteria":c__Deltaproteobacteria:o__Desulfobacterales:f__Desulfobacteraceae:g__Desulfosalsimonas
Desulfosarcina	5	5	0	4	4	5	0	4	5	5	0	p__"Proteobacteria":c__Deltaproteobacteria:o__Desulfobacterales:f__Desulfobacteraceae:g__Desulfosarcina
Desulfosoma	1	1	0	1	1	1	0	1	1	0	0	p__"Proteobacteria":c__Deltaproteobacteria:o__Syntrophobacterales:f__Syntrophobacteraceae:g__Desulfosoma
Desulfosporosinus	51	51	0	39	37	51	0	22	30	40	0	p__Firmicutes:c__Clostridia:o__Clostridiales:f__Peptococcaceae 1:g__Desulfosporosinus
Desulfotalea	10	9	0	9	8	9	0	9	0	9	0	p__"Proteobacteria":c__Deltaproteobacteria:o__Desulfobacterales:f__Desulfobulbaceae:g__Desulfotalea
Desulfothermus	1	1	0	1	1	1	0	1	1	1	1	p__"Proteobacteria":c__Deltaproteobacteria:o__Desulfovibrionales:f__Desulfohalobiaceae:g__Desulfothermus
Desulfotignum	3	3	0	3	3	3	0	3	3	3	0	p__"Proteobacteria":c__Deltaproteobacteria:o__Desulfobacterales:f__Desulfobacteraceae:g__Desulfotignum
Desulfotomaculum	91	78	0	33	1	50	0	19	43	16	5	p__Firmicutes:c__Clostridia:o__Clostridiales:f__Peptococcaceae 2:g__Desulfotomaculum
Desulfovibrio	230	226	0	162	119	79	0	69	16	6	0	p__"Proteobacteria":c__Deltaproteobacteria:o__Desulfovibrionales:f__Desulfovibrionaceae:g__Desulfovibrio
Desulfovirga	1	1	0	1	1	0	0	1	0	1	0	p__"Proteobacteria":c__Deltaproteobacteria:o__Syntrophobacterales:f__Syntrophobacteraceae:g__Desulfovirga
Desulfurella	6	6	0	6	6	6	0	6	6	6	0	p__"Proteobacteria":c__Deltaproteobacteria:o__Desulfurellales:f__Desulfurellaceae:g__Desulfurella
Desulfurispirillum	5	5	0	5	5	5	0	5	4	5	0	p__"Chrysiogenetes":c__Chrysiogenetes:o__Chrysiogenales:f__Chrysiogenaceae:g__Desulfurispirillum
Desulfurivibrio	3	3	0	3	2	2	0	2	0	0	0	p__"Proteobacteria":c__Deltaproteobacteria:o__Desulfobacterales:f__Desulfobulbaceae:g__Desulfurivibrio
Desulfurobacterium	7	7	0	5	4	2	0	4	2	6	4	p__"Aquificae":c__Aquificae:o__Aquificales:f__Desulfurobacteriaceae:g__Desulfurobacterium
Desulfuromonas	12	12	0	9	7	4	0	8	0	3	0	p__"Proteobacteria":c__Deltaproteobacteria:o__Desulfuromonadales:f__Desulfuromonadaceae:g__Desulfuromonas
Desulfuromusa	4	4	0	3	4	4	0	4	0	0	0	p__"Proteobacteria":c__Deltaproteobacteria:o__Desulfuromonadales:f__Desulfuromonadaceae:g__Desulfuromusa
Dethiobacter	1	1	0	1	0	1	0	1	0	1	0	p__Firmicutes:c__Erysipelotrichia:o__Natranaerobiales:f__Natranaerobiaceae:g__Dethiobacter
Dethiosulfatibacter	1	1	0	1	0	1	0	1	0	1	0	p__Firmicutes:c__Clostridia:o__Clostridiales:f__Clostridiales_Incertae Sedis XI:g__Dethiosulfatibacter
Dethiosulfovibrio	4	4	0	1	0	4	0	4	4	4	0	p__"Synergistetes":c__Synergistia:o__Synergistales:f__Synergistaceae:g__Dethiosulfovibrio
Devosia	49	47	0	0	0	23	0	15	0	26	0	p__"Proteobacteria":c__Alphaproteobacteria:o__Rhizobiales:f__Hyphomicrobiaceae:g__Devosia
Devriesea	1	1	0	1	0	0	0	0	0	0	0	p__"Actinobacteria":c__Actinobacteria:o__Actinomycetales:f__Dermabacteraceae:g__Devriesea
Dialister	15	15	0	15	14	15	0	13	13	13	0	p__Firmicutes:c__Clostridia:o__Clostridiales:f__Veillonellaceae:g__Dialister
Dickeya	60	58	0	9	21	40	0	31	5	0	0	p__"Proteobacteria":c__Gammaproteobacteria:o__"Enterobacteriales":f__Enterobacteriaceae:g__Dickeya
Dictyoglomus	8	8	0	7	0	8	0	7	7	8	0	p__"Dictyoglomi":c__"Dictyoglomia":o__"Dictyoglomales":f__"Dictyoglomaceae":g__Dictyoglomus
Dietzia	3	3	0	3	0	3	0	0	0	0	0	p__"Actinobacteria":c__Actinobacteria:o__Actinomycetales:f__Dietziaceae:g__Dietzia
Dinoroseobacter	6	6	0	0	0	6	0	6	0	0	0	p__"Proteobacteria":c__Alphaproteobacteria:o__Rhodobacterales:f__Rhodobacteraceae:g__Dinoroseobacter
Diplorickettsia	3	3	0	3	1	3	3	3	3	3	0	p__Nitrospinae:c__Fimbriimonadia:o__Magnetococcales:f__Magnetococcaceae:g__Diplorickettsia
Dokdonella	16	15	0	8	8	8	0	5	0	0	0	p__"Proteobacteria":c__Gammaproteobacteria:o__Xanthomonadales:f__Xanthomonadaceae:g__Dokdonella
Dokdonia	15	15	0	14	14	15	0	0	0	0	0	p__"Bacteroidetes":c__Flavobacteriia:o__"Flavobacteriales":f__Flavobacteriaceae:g__Dokdonia
Dolosicoccus	1	1	0	1	1	0	0	1	1	1	0	p__Firmicutes:c__Bacilli:o__Lactobacillales:f__Aerococcaceae:g__Dolosicoccus
Dolosigranulum	2	2	0	2	2	2	0	0	0	2	0	p__Firmicutes:c__Bacilli:o__Lactobacillales:f__Carnobacteriaceae:g__Dolosigranulum
Domibacillus	2	2	0	1	1	0	0	1	0	1	0	p__Nitrospinae:c__Fimbriimonadia:o__Fimbriimonadales:f__Mooreiaceae:g__Domibacillus
Donghicola	12	3	0	0	0	0	0	3	0	0	0	p__"Proteobacteria":c__Alphaproteobacteria:o__Rhodobacterales:f__Rhodobacteraceae:g__Donghicola
Dongia	2	2	0	0	0	1	0	1	0	1	0	p__"Proteobacteria":c__Alphaproteobacteria:o__Rhodospirillales:f__Rhodospirillaceae:g__Dongia
Dorea	2	2	0	0	0	2	0	0	2	2	0	p__Firmicutes:c__Clostridia:o__Clostridiales:f__Lachnospiraceae:g__Dorea
Duganella	24	17	0	3	3	14	0	2	0	0	0	p__"Proteobacteria":c__Betaproteobacteria:o__Burkholderiales:f__Oxalobacteraceae:g__Duganella
Dyella	46	44	0	23	30	29	0	0	0	0	0	p__"Proteobacteria":c__Gammaproteobacteria:o__Xanthomonadales:f__Xanthomonadaceae:g__Dyella
Ectothiorhodosinus	1	1	0	0	1	1	0	1	0	0	0	p__"Proteobacteria":c__Gammaproteobacteria:o__Chromatiales:f__Ectothiorhodospiraceae:g__Ectothiorhodosinus
Ectothiorhodospira	16	16	0	14	12	15	0	2	1	13	0	p__"Proteobacteria":c__Gammaproteobacteria:o__Chromatiales:f__Ectothiorhodospiraceae:g__Ectothiorhodospira
Edwardsiella	130	128	0	0	57	126	0	128	0	0	0	p__"Proteobacteria":c__Gammaproteobacteria:o__"Enterobacteriales":f__Enterobacteriaceae:g__Edwardsiella
Eggerthella	14	11	0	9	0	11	0	0	1	11	0	p__"Actinobacteria":c__Actinobacteria:o__Coriobacteriales:f__Coriobacteriaceae:g__Eggerthella
Eggerthia	1	1	0	1	1	1	0	1	1	1	0	p__Nitrospinae:c__Fimbriimonadia:o__Fimbriimonadales:f__Fimbriimonadaceae:g__Eggerthia
Ehrlichia	4	1	0	0	0	1	0	1	1	1	0	p__"Proteobacteria":c__Alphaproteobacteria:o__Rickettsiales:f__Anaplasmataceae:g__Ehrlichia
Eikenella	9	7	0	2	7	6	0	2	0	0	0	p__"Proteobacteria":c__Betaproteobacteria:o__Neisseriales:f__Neisseriaceae:g__Eikenella
Ekhidna	1	1	0	0	0	1	0	0	0	0	0	p__"Bacteroidetes":c__Sphingobacteriia:o__"Sphingobacteriales":f__Cytophagaceae:g__Ekhidna
Elizabethkingia	38	36	0	13	36	36	0	0	0	36	0	p__"Bacteroidetes":c__Flavobacteriia:o__"Flavobacteriales":f__Flavobacteriaceae:g__Elizabethkingia
Elusimicrobium	1	1	0	1	0	1	0	1	1	1	0	p__"Elusimicrobia":c__Elusimicrobia:o__Elusimicrobiales:f__Elusimicrobiaceae:g__Elusimicrobium
Empedobacter	9	4	0	3	2	3	0	0	0	0	0	p__"Bacteroidetes":c__Flavobacteriia:o__"Flavobacteriales":f__Flavobacteriaceae:g__Empedobacter
Endobacter	1	1	0	1	0	1	0	1	0	0	0	p__Nitrospinae:c__Thermoflexia:o__Candidatus Brocadiales:f__Candidatus Brocadiaceae:g__Endobacter
Endozoicomonas	4	4	0	0	2	2	0	1	4	3	0	p__"Proteobacteria":c__Gammaproteobacteria:o__Oceanospirillales:f__Hahellaceae:g__Endozoicomonas
Enhydrobacter	7	6	0	0	6	6	0	2	0	0	0	p__"Proteobacteria":c__Gammaproteobacteria:o__Pseudomonadales:f__Moraxellaceae:g__Enhydrobacter
Enhygromyxa	2	2	0	2	2	2	0	2	0	2	0	p__"Proteobacteria":c__Deltaproteobacteria:o__Myxococcales:f__Nannocystaceae:g__Enhygromyxa
Ensifer	430	417	0	0	0	5	0	263	0	0	0	p__"Proteobacteria":c__Alphaproteobacteria:o__Rhizobiales:f__Rhizobiaceae:g__Ensifer
Enteractinococcus	3	1	0	1	0	1	0	1	0	0	0	p__Nitrospinae:c__Thermoflexia:o__Candidatus Brocadiales:f__Candidatus Brocadiaceae:g__Enteractinococcus
Enterobacter	693	484	0	0	0	0	0	0	0	0	0	p__"Proteobacteria":c__Gammaproteobacteria:o__"Enterobacteriales":f__Enterobacteriaceae:g__Enterobacter
Enterococcus	976	966	0	930	420	44	0	586	1	899	0	p__Firmicutes:c__Bacilli:o__Lactobacillales:f__Enterococcaceae:g__Enterococcus
Enterorhabdus	1	1	0	1	0	1	0	0	1	1	0	p__"Actinobacteria":c__Actinobacteria:o__Coriobacteriales:f__Coriobacteriaceae:g__Enterorhabdus
Enterovibrio	11	11	0	5	8	10	0	5	0	7	0	p__"Proteobacteria":c__Gammaproteobacteria:o__"Vibrionales":f__Vibrionaceae:g__Enterovibrio
Entomoplasma	8	4	0	4	3	4	0	0	2	4	0	p__"Tenericutes":c__Mollicutes:o__Entomoplasmatales:f__Entomoplasmataceae:g__Entomoplasma
Erwinia	166	148	0	80	13	0	0	84	0	0	0	p__"Proteobacteria":c__Gammaproteobacteria:o__"Enterobacteriales":f__Enterobacteriaceae:g__Erwinia
Erysipelothrix	30	30	0	29	27	30	0	0	25	30	25	p__Firmicutes:c__Erysipelotrichia:o__Erysipelotrichales:f__Erysipelotrichaceae:g__Erysipelothrix
Erythrobacter	106	93	0	0	0	68	0	68	25	76	0	p__"Proteobacteria":c__Alphaproteobacteria:o__Sphingomonadales:f__Erythrobacteraceae:g__Erythrobacter
Escherichia/Shigella	5	4	0	0	4	3	0	3	0	0	0	p__"Proteobacteria":c__Gammaproteobacteria:o__"Enterobacteriales":f__Enterobacteriaceae:g__Escherichia/Shigella
Ethanoligenens	12	12	0	12	0	12	0	10	12	12	0	p__Firmicutes:c__Clostridia:o__Clostridiales:f__Ruminococcaceae:g__Ethanoligenens
Eubacterium	127	43	0	36	0	11	0	21	0	3	0	p__Firmicutes:c__Clostridia:o__Clostridiales:f__Eubacteriaceae:g__Eubacterium
Eudoraea	1	1	0	0	0	0	0	0	0	0	0	p__"Bacteroidetes":c__Flavobacteriia:o__"Flavobacteriales":f__Flavobacteriaceae:g__Eudoraea
Euzebya	1	1	0	1	0	1	0	0	1	1	0	p__"Actinobacteria":c__Actinobacteria:o__Euzebyales:f__Euzebyaceae:g__Euzebya
Exiguobacterium	212	212	0	211	132	206	0	175	74	206	0	p__Firmicutes:c__Bacilli:o__Bacillales:f__Bacillales_Incertae Sedis XII:g__Exiguobacterium
Exilispira	1	1	0	1	1	1	0	1	0	1	0	p__"Spirochaetes":c__Spirochaetia:o__Spirochaetales:f__Spirochaetales_incertae_sedis:g__Exilispira
Extensimonas	1	1	0	1	1	0	0	0	0	0	0	p__Nitrospinae:c__Fimbriimonadia:o__Magnetococcales:f__SAR11:g__Extensimonas
Facklamia	5	5	0	5	5	3	0	5	0	3	0	p__Firmicutes:c__Bacilli:o__Lactobacillales:f__Aerococcaceae:g__Facklamia
Faecalibacterium	11	8	0	4	0	7	0	0	6	6	0	p__Firmicutes:c__Clostridia:o__Clostridiales:f__Ruminococcaceae:g__Faecalibacterium
Fangia	2	2	0	1	1	1	0	1	1	1	0	p__"Proteobacteria":c__Gammaproteobacteria:o__Thiotrichales:f__Thiotrichales_incertae_sedis:g__Fangia
Ferribacterium	2	2	0	0	1	2	0	0	0	1	0	p__"Proteobacteria":c__Betaproteobacteria:o__Rhodocyclales:f__Rhodocyclaceae:g__Ferribacterium
Ferrimicrobium	6	6	0	6	0	6	0	0	0	0	0	p__"Actinobacteria":c__Actinobacteria:o__Acidimicrobiales:f__Acidimicrobiaceae:g__Ferrimicrobium
Ferrimonas	40	40	0	39	12	32	0	4	0	35	0	p__"Proteobacteria":c__Gammaproteobacteria:o__Alteromonadales:f__Ferrimonadaceae:g__Ferrimonas
Ferritrophicum	1	1	0	1	1	0	0	1	0	0	0	p__Nitrospinae:c__Thermoflexia:o__Ferritrophicales:f__Ferritrophicaceae:g__Ferritrophicum
Ferrovum	1	1	0	0	0	0	0	0	0	0	0	p__Nitrospinae:c__Thermoflexia:o__Ferrovales:f__Ferrovaceae:g__Ferrovum
Fervidicola	1	1	0	1	0	1	0	1	0	1	0	p__Firmicutes:c__Clostridia:o__Clostridiales:f__Clostridiales_Incertae Sedis III:g__Fervidicola
Fervidobacterium	14	14	0	13	0	13	0	8	2	8	0	p__"Thermotogae":c__Thermotogae:o__Thermotogales:f__Fervidobacteriaceae:g__Fervidobacterium
Fibrobacter	2	2	0	0	0	2	0	2	2	2	0	p__"Fibrobacteres":c__"Fibrobacteria":o__"Fibrobacterales":f__"Fibrobacteraceae":g__Fibrobacter
Filibacter	3	3	0	0	3	0	0	3	0	0	0	p__Firmicutes:c__Bacilli:o__Bacillales:f__Planococcaceae:g__Filibacter
Filifactor	11	11	0	9	0	11	0	9	9	9	0	p__Firmicutes:c__Clostridia:o__Clostridiales:f__Peptostreptococcaceae:g__Filifactor
Filobacillus	4	3	0	2	2	0	0	0	0	3	0	p__Firmicutes:c__Bacilli:o__Bacillales:f__Bacillaceae 2:g__Filobacillus
Filomicrobium	1	1	0	0	0	1	0	1	0	1	0	p__"Proteobacteria":c__Alphaproteobacteria:o__Rhizobiales:f__Hyphomicrobiaceae:g__Filomicrobium
Fimbriimonas	5	5	0	5	0	5	0	0	5	5	0	p__Nitrospinae:c__Fimbriimonadia:o__Fimbriimonadales:f__Fimbriimonadaceae:g__Fimbriimonas
Finegoldia	14	13	0	13	0	13	0	13	11	13	0	p__Firmicutes:c__Clostridia:o__Clostridiales:f__Clostridiales_Incertae Sedis XI:g__Finegoldia
Flagellimonas	1	1	0	1	0	1	0	0	0	0	0	p__"Bacteroidetes":c__Flavobacteriia:o__"Flavobacteriales":f__Flavobacteriaceae:g__Flagellimonas
Flammeovirga	3	3	0	3	3	3	0	0	3	3	0	p__"Bacteroidetes":c__Sphingobacteriia:o__"Sphingobacteriales":f__Flammeovirgaceae:g__Flammeovirga
Flavihumibacter	1	1	0	0	0	0	0	0	1	1	0	p__"Bacteroidetes":c__Sphingobacteriia:o__"Sphingobacteriales":f__Chitinophagaceae:g__Flavihumibacter
Flavivirga	2	1	0	1	0	0	0	0	0	0	0	p__Nitrospinae:c__Thermoflexia:o__Candidatus Brocadiales:f__Candidatus Brocadiaceae:g__Flavivirga
Flavobacterium	641	617	0	346	260	572	0	0	0	9	0	p__"Bacteroidetes":c__Flavobacteriia:o__"Flavobacteriales":f__Flavobacteriaceae:g__Flavobacterium
Flavonifractor	18	18	0	18	0	18	0	4	0	15	0	p__Firmicutes:c__Erysipelotrichia:o__Erysipelotrichales:f__Bacillales_incertae_sedis:g__Flavonifractor
Flexistipes	5	1	0	1	1	1	0	0	1	1	0	p__"Deferribacteres":c__Deferribacteres:o__Deferribacterales:f__Deferribacteraceae:g__Flexistipes
Flexithrix	13	10	0	10	10	10	0	0	9	9	0	p__"Bacteroidetes":c__Sphingobacteriia:o__"Sphingobacteriales":f__Flammeovirgaceae:g__Flexithrix
Fluviicola	1	1	0	0	0	0	0	0	0	0	0	p__"Bacteroidetes":c__Flavobacteriia:o__"Flavobacteriales":f__Cryomorphaceae:g__Fluviicola
Fodinibacter	1	1	0	1	0	0	0	0	0	0	0	p__"Actinobacteria":c__Actinobacteria:o__Actinomycetales:f__Intrasporangiaceae:g__Fodinibacter
Fodinicurvata	1	1	0	0	0	1	0	1	1	1	0	p__"Proteobacteria":c__Alphaproteobacteria:o__Rhodospirillales:f__Rhodospirillaceae:g__Fodinicurvata
Fontibacillus	3	2	0	2	2	2	0	2	2	2	0	p__Firmicutes:c__Erysipelotrichia:o__Erysipelotrichales:f__Bacillales_incertae_sedis:g__Fontibacillus
Formivibrio	1	1	0	1	1	1	0	0	0	0	0	p__"Proteobacteria":c__Betaproteobacteria:o__Neisseriales:f__Neisseriaceae:g__Formivibrio
Formosa	24	12	0	9	9	11	0	0	0	6	0	p__"Bacteroidetes":c__Flavobacteriia:o__"Flavobacteriales":f__Flavobacteriaceae:g__Formosa
Francisella	124	124	0	116	111	120	0	102	124	115	0	p__"Proteobacteria":c__Gammaproteobacteria:o__Thiotrichales:f__Francisellaceae:g__Francisella
Frateuria	34	26	0	24	26	0	0	2	0	0	0	p__"Proteobacteria":c__Gammaproteobacteria:o__Xanthomonadales:f__Xanthomonadaceae:g__Frateuria
Friedmanniella	9	9	0	9	0	9	0	0	0	5	0	p__"Actinobacteria":c__Actinobacteria:o__Actinomycetales:f__Propionibacteriaceae:g__Friedmanniella
Frigoribacterium	21	16	0	0	0	0	0	0	0	0	0	p__"Actinobacteria":c__Actinobacteria:o__Actinomycetales:f__Microbacteriaceae:g__Frigoribacterium
Frischella	1	1	0	1	1	1	0	1	0	1	0	p__Nitrospinae:c__Thermoflexia:o__Orbales:f__Orbaceae:g__Frischella
Frondihabitans	4	4	0	2	0	0	0	0	0	0	0	p__"Actinobacteria":c__Actinobacteria:o__Actinomycetales:f__Microbacteriaceae:g__Frondihabitans
Fructobacillus	9	9	0	6	9	9	0	9	7	9	0	p__Firmicutes:c__Erysipelotrichia:o__Erysipelotrichales:f__Bacillales_incertae_sedis:g__Fructobacillus
Fulvibacter	1	1	0	1	1	1	0	0	1	1	0	p__"Bacteroidetes":c__Flavobacteriia:o__"Flavobacteriales":f__Flavobacteriaceae:g__Fulvibacter
Fulvimarina	4	3	0	0	0	3	0	3	0	0	0	p__"Proteobacteria":c__Alphaproteobacteria:o__Rhizobiales:f__"Aurantimonadaceae":g__Fulvimarina
Fulvimonas	3	1	0	1	1	0	0	0	0	0	0	p__"Proteobacteria":c__Gammaproteobacteria:o__Xanthomonadales:f__Xanthomonadaceae:g__Fulvimonas
Fusibacter	4	4	0	1	0	1	0	1	1	1	0	p__Firmicutes:c__Clostridia:o__Clostridiales:f__Clostridiales_Incertae Sedis XII:g__Fusibacter
Fusobacterium	123	119	0	92	0	114	0	101	104	88	0	p__"Fusobacteria":c__Fusobacteriia:o__"Fusobacteriales":f__"Fusobacteriaceae":g__Fusobacterium
Gaetbulibacter	12	8	0	6	0	0	0	0	0	0	0	p__"Bacteroidetes":c__Flavobacteriia:o__"Flavobacteriales":f__Flavobacteriaceae:g__Gaetbulibacter
Gaetbulicola	1	1	0	0	0	0	0	0	0	0	0	p__"Proteobacteria":c__Alphaproteobacteria:o__Rhodobacterales:f__Rhodobacteraceae:g__Gaetbulicola
Gaiella	2	2	0	2	2	2	0	2	2	2	0	p__Nitrospinae:c__Thermoflexia:o__Gaiellales:f__Gaiellaceae:g__Gaiella
Galbibacter	4	3	0	3	0	3	0	0	0	0	0	p__"Bacteroidetes":c__Flavobacteriia:o__"Flavobacteriales":f__Flavobacteriaceae:g__Galbibacter
Gallibacterium	51	51	0	39	1	36	0	43	43	51	0	p__"Proteobacteria":c__Gammaproteobacteria:o__Pasteurellales:f__Pasteurellaceae:g__Gallibacterium
Gangjinia	1	1	0	1	1	1	0	0	0	1	0	p__"Bacteroidetes":c__Flavobacteriia:o__"Flavobacteriales":f__Flavobacteriaceae:g__Gangjinia
Garciella	3	3	0	2	0	2	0	2	2	2	0	p__Firmicutes:c__Clostridia:o__Clostridiales:f__Eubacteriaceae:g__Garciella
Gelidibacter	9	7	0	7	0	5	0	0	0	0	0	p__"Bacteroidetes":c__Flavobacteriia:o__"Flavobacteriales":f__Flavobacteriaceae:g__Gelidibacter
Gelria	1	1	0	1	0	1	0	1	1	1	1	p__Firmicutes:c__Clostridia:o__Thermoanaerobacterales:f__Thermoanaerobacteraceae:g__Gelria
Gemella	13	13	0	13	13	13	0	12	13	11	0	p__Firmicutes:c__Bacilli:o__Bacillales:f__Bacillales_Incertae Sedis XI:g__Gemella
Gemmata	5	5	0	0	3	3	0	3	3	3	0	p__"Planctomycetes":c__Planctomycetia:o__Planctomycetales:f__Planctomycetaceae:g__Gemmata
Gemmatimonas	4	4	0	2	2	2	0	2	2	2	0	p__"Gemmatimonadetes":c__Gemmatimonadetes:o__Gemmatimonadales:f__Gemmatimonadaceae:g__Gemmatimonas
Gemmobacter	11	6	0	0	0	6	0	2	1	0	0	p__"Proteobacteria":c__Alphaproteobacteria:o__Rhodobacterales:f__Rhodobacteraceae:g__Gemmobacter
Geoalkalibacter	2	2	0	2	2	2	0	2	0	0	1	p__"Proteobacteria":c__Deltaproteobacteria:o__Desulfuromonadales:f__Geobacteraceae:g__Geoalkalibacter
Geobacillus	492	477	0	473	360	14	0	438	219	435	0	p__Firmicutes:c__Bacilli:o__Bacillales:f__Bacillaceae 1:g__Geobacillus
Geobacter	48	48	0	45	25	41	0	14	1	18	0	p__"Proteobacteria":c__Deltaproteobacteria:o__Desulfuromonadales:f__Geobacteraceae:g__Geobacter
Geodermatophilus	1	1	0	1	0	1	0	0	0	0	0	p__"Actinobacteria":c__Actinobacteria:o__Actinomycetales:f__Geodermatophilaceae:g__Geodermatophilus
Geomicrobium	3	3	0	2	2	2	0	0	1	2	0	p__Firmicutes:c__Erysipelotrichia:o__Erysipelotrichales:f__Bacillales_incertae_sedis:g__Geomicrobium
Geopsychrobacter	2	2	0	2	0	2	0	2	0	2	0	p__"Proteobacteria":c__Deltaproteobacteria:o__Desulfuromonadales:f__Geobacteraceae:g__Geopsychrobacter
Georgenia	4	4	0	1	0	3	0	0	0	0	0	p__"Actinobacteria":c__Actinobacteria:o__Actinomycetales:f__Bogoriellaceae:g__Georgenia
Georgfuchsia	1	1	0	0	1	0	0	0	0	0	0	p__"Proteobacteria":c__Betaproteobacteria:o__Rhodocyclales:f__Rhodocyclaceae:g__Georgfuchsia
Geosporobacter	2	2	0	0	0	0	0	0	0	0	0	p__Firmicutes:c__Erysipelotrichia:o__Erysipelotrichales:f__Bacillales_incertae_sedis:g__Geosporobacter
Geotoga	1	1	0	1	1	1	0	1	1	1	0	p__"Thermotogae":c__Thermotogae:o__Petrotogales:f__Petrotogaceae:g__Geotoga
Geovibrio	1	1	0	1	1	1	0	1	1	1	0	p__"Deferribacteres":c__Deferribacteres:o__Deferribacterales:f__Deferribacteraceae:g__Geovibrio
Gibbsiella	2	0	0	0	0	0	0	0	0	0	0	p__"Proteobacteria":c__Gammaproteobacteria:o__"Enterobacteriales":f__Enterobacteriaceae:g__Gibbsiella
Giesbergeria	9	9	0	4	6	9	0	8	0	0	0	p__"Proteobacteria":c__Betaproteobacteria:o__Burkholderiales:f__Comamonadaceae:g__Giesbergeria
Gilliamella	8	8	0	6	5	6	0	0	5	6	0	p__Nitrospinae:c__Thermoflexia:o__Orbales:f__Orbaceae:g__Gilliamella
Gillisia	14	13	0	10	3	11	0	0	0	0	0	p__"Bacteroidetes":c__Flavobacteriia:o__"Flavobacteriales":f__Flavobacteriaceae:g__Gillisia
Gilvibacter	2	2	0	2	0	0	0	0	0	0	0	p__"Bacteroidetes":c__Flavobacteriia:o__"Flavobacteriales":f__Flavobacteriaceae:g__Gilvibacter
Glaciecola	95	95	0	86	67	67	0	45	0	92	0	p__"Proteobacteria":c__Gammaproteobacteria:o__Alteromonadales:f__Alteromonadaceae:g__Glaciecola
Glaciibacter	2	2	0	2	2	0	0	0	0	0	0	p__"Actinobacteria":c__Actinobacteria:o__Actinomycetales:f__Microbacteriaceae:g__Glaciibacter
Glaciimonas	4	4	0	1	2	0	0	2	0	0	0	p__Nitrospinae:c__Fimbriimonadia:o__Magnetococcales:f__SAR11:g__Glaciimonas
Globicatella	4	3	0	2	0	0	0	2	0	2	0	p__Firmicutes:c__Bacilli:o__Lactobacillales:f__Aerococcaceae:g__Globicatella
Gluconacetobacter	65	64	0	17	0	58	0	0	50	52	0	p__"Proteobacteria":c__Alphaproteobacteria:o__Rhodospirillales:f__Acetobacteraceae:g__Gluconacetobacter
Gluconobacter	170	170	0	4	0	169	0	1	167	55	0	p__"Proteobacteria":c__Alphaproteobacteria:o__Rhodospirillales:f__Acetobacteraceae:g__Gluconobacter
Glycomyces	20	20	0	10	12	13	0	0	19	18	0	p__"Actinobacteria":c__Actinobacteria:o__Actinomycetales:f__Glycomycetaceae:g__Glycomyces
Gordonia	3	3	0	1	0	2	0	0	2	0	0	p__"Actinobacteria":c__Actinobacteria:o__Actinomycetales:f__Nocardiaceae:g__Gordonia
Gordonibacter	5	5	0	3	0	5	0	0	3	4	0	p__"Actinobacteria":c__Actinobacteria:o__Coriobacteriales:f__Coriobacteriaceae:g__Gordonibacter
Gracilibacillus	21	21	0	10	14	12	0	16	0	1	0	p__Firmicutes:c__Bacilli:o__Bacillales:f__Bacillaceae 2:g__Gracilibacillus
Gracilimonas	1	1	0	1	1	1	0	1	0	1	0	p__"Bacteroidetes":c__Sphingobacteriia:o__"Sphingobacteriales":f__Chitinophagaceae:g__Gracilimonas
Gramella	15	15	0	7	9	10	0	0	0	15	0	p__"Bacteroidetes":c__Flavobacteriia:o__"Flavobacteriales":f__Flavobacteriaceae:g__Gramella
Granulibacter	13	13	0	0	0	13	0	13	0	13	0	p__"Proteobacteria":c__Alphaproteobacteria:o__Rhodospirillales:f__Acetobacteraceae:g__Granulibacter
Granulicatella	12	12	0	11	10	0	0	0	0	12	0	p__Firmicutes:c__Bacilli:o__Lactobacillales:f__Carnobacteriaceae:g__Granulicatella
Granulosicoccus	7	7	0	7	4	4	0	7	0	0	0	p__"Proteobacteria":c__Gammaproteobacteria:o__Chromatiales:f__Granulosicoccaceae:g__Granulosicoccus
Grimontia	6	5	0	4	2	0	0	4	0	0	0	p__"Proteobacteria":c__Gammaproteobacteria:o__"Vibrionales":f__Vibrionaceae:g__Grimontia
Gryllotalpicola	1	1	0	0	0	0	0	0	0	0	0	p__Nitrospinae:c__Thermoflexia:o__Candidatus Brocadiales:f__Candidatus Brocadiaceae:g__Gryllotalpicola
Guggenheimella	1	1	0	1	0	1	0	1	0	1	0	p__Firmicutes:c__Clostridia:o__Clostridiales:f__Clostridiales_Incertae Sedis XII:g__Guggenheimella
Gulbenkiania	1	1	0	1	1	1	0	1	0	1	0	p__"Proteobacteria":c__Betaproteobacteria:o__Neisseriales:f__Neisseriaceae:g__Gulbenkiania
Haematobacter	15	14	0	0	0	14	0	13	0	0	0	p__"Proteobacteria":c__Alphaproteobacteria:o__Rhodobacterales:f__Rhodobacteraceae:g__Haematobacter
Haemophilus	682	645	0	347	506	3	0	49	0	476	0	p__"Proteobacteria":c__Gammaproteobacteria:o__Pasteurellales:f__Pasteurellaceae:g__Haemophilus
Hafnia	33	24	0	0	0	0	0	0	0	0	0	p__"Proteobacteria":c__Gammaproteobacteria:o__"Enterobacteriales":f__Enterobacteriaceae:g__Hafnia
Hahella	3	3	0	2	3	3	0	0	0	2	0	p__"Proteobacteria":c__Gammaproteobacteria:o__Oceanospirillales:f__Hahellaceae:g__Hahella
Halalkalibacillus	1	1	0	1	1	0	0	1	0	1	0	p__Firmicutes:c__Erysipelotrichia:o__Erysipelotrichales:f__Bacillales_incertae_sedis:g__Halalkalibacillus
Halanaerobacter	3	3	0	0	2	3	0	2	3	3	0	p__Firmicutes:c__Clostridia:o__Halanaerobiales:f__Halobacteroidaceae:g__Halanaerobacter
Halanaerobium	28	28	0	27	25	27	0	21	28	20	0	p__Firmicutes:c__Clostridia:o__Halanaerobiales:f__Halanaerobiaceae:g__Halanaerobium
Halarsenatibacter	1	1	0	1	1	1	0	1	0	1	0	p__Firmicutes:c__Erysipelotrichia:o__Natranaerobiales:f__Natranaerobiaceae:g__Halarsenatibacter
Haliangium	4	4	0	4	3	3	0	3	4	3	0	p__"Proteobacteria":c__Deltaproteobacteria:o__Myxococcales:f__"Haliangiaceae":g__Haliangium
Haliea	8	8	0	0	4	3	0	1	0	3	0	p__"Proteobacteria":c__Gammaproteobacteria:o__Alteromonadales:f__Alteromonadaceae:g__Haliea
Haliscomenobacter	1	1	0	0	1	1	0	0	1	0	0	p__"Bacteroidetes":c__Sphingobacteriia:o__"Sphingobacteriales":f__"Saprospiraceae":g__Haliscomenobacter
Haloactinobacterium	1	1	0	1	0	0	0	1	0	0	0	p__"Actinobacteria":c__Actinobacteria:o__Actinomycetales:f__Ruaniaceae:g__Haloactinobacterium
Halobacillus	178	167	0	127	108	158	0	95	0	154	0	p__Firmicutes:c__Bacilli:o__Bacillales:f__Bacillaceae 2:g__Halobacillus
Halobacteroides	8	8	0	6	6	5	0	6	7	0	0	p__Firmicutes:c__Clostridia:o__Halanaerobiales:f__Halobacteroidaceae:g__Halobacteroides
Halocella	1	1	0	0	1	1	0	0	1	1	0	p__Firmicutes:c__Clostridia:o__Halanaerobiales:f__Halanaerobiaceae:g__Halocella
Halochromatium	11	11	0	4	11	4	0	0	11	0	0	p__"Proteobacteria":c__Gammaproteobacteria:o__Chromatiales:f__Chromatiaceae:g__Halochromatium
Haloferula	7	7	0	6	6	6	0	6	5	6	0	p__"Verrucomicrobia":c__Verrucomicrobiae:o__Verrucomicrobiales:f__Verrucomicrobiaceae:g__Haloferula
Halolactibacillus	21	21	0	21	0	18	0	19	0	21	0	p__Firmicutes:c__Bacilli:o__Bacillales:f__Bacillaceae 2:g__Halolactibacillus
Halomonas	782	698	0	343	351	659	0	1	0	38	1	p__"Proteobacteria":c__Gammaproteobacteria:o__Oceanospirillales:f__Halomonadaceae:g__Halomonas
Halorhodospira	10	10	0	8	8	6	0	4	0	6	0	p__"Proteobacteria":c__Gammaproteobacteria:o__Chromatiales:f__Ectothiorhodospiraceae:g__Halorhodospira
Halospina	1	1	0	0	1	1	0	0	0	1	0	p__"Proteobacteria":c__Gammaproteobacteria:o__Oceanospirillales:f__Hahellaceae:g__Halospina
Halotalea	1	1	0	0	1	1	0	1	0	0	0	p__"Proteobacteria":c__Gammaproteobacteria:o__Oceanospirillales:f__Halomonadaceae:g__Halotalea
Halothermothrix	5	5	0	5	5	5	0	5	1	1	0	p__Firmicutes:c__Clostridia:o__Halanaerobiales:f__Halanaerobiaceae:g__Halothermothrix
Halothiobacillus	14	13	0	4	2	6	0	0	1	3	0	p__"Proteobacteria":c__Gammaproteobacteria:o__Chromatiales:f__Halothiobacillaceae:g__Halothiobacillus
Halovibrio	8	3	0	0	1	1	0	0	0	1	0	p__"Proteobacteria":c__Gammaproteobacteria:o__Oceanospirillales:f__Halomonadaceae:g__Halovibrio
Hansschlegelia	4	4	0	0	0	3	0	3	0	0	0	p__"Proteobacteria":c__Alphaproteobacteria:o__Rhizobiales:f__Methylocystaceae:g__Hansschlegelia
Hasllibacter	1	1	0	0	0	0	0	0	0	0	0	p__Nitrospinae:c__Fimbriimonadia:o__Fimbriimonadales:f__Defluviitaleaceae:g__Hasllibacter
Hazenella	3	3	0	3	0	3	0	3	0	3	0	p__Nitrospinae:c__Fimbriimonadia:o__Magnetococcales:f__SAR11:g__Hazenella
Helcobacillus	1	1	0	1	0	1	0	0	0	0	0	p__"Actinobacteria":c__Actinobacteria:o__Actinomycetales:f__Dermabacteraceae:g__Helcobacillus
Helcococcus	6	6	0	4	0	4	0	1	3	3	0	p__Firmicutes:c__Clostridia:o__Clostridiales:f__Clostridiales_Incertae Sedis XI:g__Helcococcus
Helicobacter	442	442	0	2	0	405	0	261	163	341	1	p__"Proteobacteria":c__Epsilonproteobacteria:o__Campylobacterales:f__Helicobacteraceae:g__Helicobacter
Heliobacillus	3	3	0	1	0	3	0	0	0	0	0	p__Firmicutes:c__Clostridia:o__Clostridiales:f__Heliobacteriaceae:g__Heliobacillus
Heliobacterium	21	21	0	10	0	20	0	13	15	16	0	p__Firmicutes:c__Clostridia:o__Clostridiales:f__Heliobacteriaceae:g__Heliobacterium
Heliophilum	1	1	0	0	0	1	0	0	0	0	0	p__Firmicutes:c__Clostridia:o__Clostridiales:f__Heliobacteriaceae:g__Heliophilum
Heliorestis	4	4	0	2	0	4	0	1	3	3	0	p__Firmicutes:c__Clostridia:o__Clostridiales:f__Heliobacteriaceae:g__Heliorestis
Hellea	1	1	0	0	0	1	0	0	0	0	0	p__"Proteobacteria":c__Alphaproteobacteria:o__Caulobacterales:f__Hyphomonadaceae:g__Hellea
Henriciella	2	2	0	0	0	2	0	2	2	0	0	p__"Proteobacteria":c__Alphaproteobacteria:o__Caulobacterales:f__Hyphomonadaceae:g__Henriciella
Herbaspirillum	182	123	0	89	82	80	0	66	174	0	0	p__"Proteobacteria":c__Betaproteobacteria:o__Burkholderiales:f__Oxalobacteraceae:g__Herbaspirillum
Herbiconiux	8	6	0	3	0	7	0	0	0	0	0	p__"Actinobacteria":c__Actinobacteria:o__Actinomycetales:f__Microbacteriaceae:g__Herbiconiux
Herbidospora	8	8	0	5	0	5	0	0	5	0	0	p__"Actinobacteria":c__Actinobacteria:o__Actinomycetales:f__Streptosporangiaceae:g__Herbidospora
Herminiimonas	14	14	0	0	8	9	0	11	0	0	0	p__"Proteobacteria":c__Betaproteobacteria:o__Burkholderiales:f__Oxalobacteraceae:g__Herminiimonas
Hespellia	2	2	0	2	0	2	0	2	2	2	0	p__Firmicutes:c__Clostridia:o__Clostridiales:f__Lachnospiraceae:g__Hespellia
Hippea	14	14	0	8	9	8	0	6	9	10	2	p__"Proteobacteria":c__Deltaproteobacteria:o__Desulfurellales:f__Desulfurellaceae:g__Hippea
Hirschia	6	6	0	0	0	6	0	0	5	0	0	p__"Proteobacteria":c__Alphaproteobacteria:o__Caulobacterales:f__Hyphomonadaceae:g__Hirschia
Histophilus	2	2	0	2	2	2	0	2	0	0	0	p__"Proteobacteria":c__Gammaproteobacteria:o__Pasteurellales:f__Pasteurellaceae:g__Histophilus
Hoeflea	3	3	0	0	0	2	0	1	0	2	0	p__"Proteobacteria":c__Alphaproteobacteria:o__Rhizobiales:f__Phyllobacteriaceae:g__Hoeflea
Holdemania	1	1	0	1	0	0	0	0	0	0	0	p__Firmicutes:c__Erysipelotrichia:o__Erysipelotrichales:f__Erysipelotrichaceae:g__Holdemania
Homoserinimonas	1	1	0	1	0	0	0	0	0	0	0	p__Nitrospinae:c__Fimbriimonadia:o__Fimbriimonadales:f__Mooreiaceae:g__Homoserinimonas
Howardella	1	1	0	1	0	1	0	1	1	1	0	p__Firmicutes:c__Erysipelotrichia:o__Erysipelotrichales:f__Bacillales_incertae_sedis:g__Howardella
Huaishuia	1	0	0	0	0	0	0	0	0	0	0	p__Nitrospinae:c__Fimbriimonadia:o__Fimbriimonadales:f__Defluviitaleaceae:g__Huaishuia
Humibacter	4	3	0	1	0	0	0	1	0	0	0	p__"Actinobacteria":c__Actinobacteria:o__Actinomycetales:f__Microbacteriaceae:g__Humibacter
Humitalea	1	1	0	1	0	1	0	1	1	0	0	p__Nitrospinae:c__Fimbriimonadia:o__Fimbriimonadales:f__Defluviitaleaceae:g__Humitalea
Hyalangium	1	1	0	0	0	0	0	0	0	1	0	p__"Proteobacteria":c__Deltaproteobacteria:o__Myxococcales:f__Cystobacteraceae:g__Hyalangium
Hydrocarboniphaga	6	6	0	6	6	6	0	0	0	0	0	p__"Proteobacteria":c__Gammaproteobacteria:o__Xanthomonadales:f__Sinobacteraceae:g__Hydrocarboniphaga
Hydrogenoanaerobacterium	3	3	0	2	0	3	0	3	0	2	0	p__Firmicutes:c__Erysipelotrichia:o__Erysipelotrichales:f__Bacillales_incertae_sedis:g__Hydrogenoanaerobacterium
Hydrogenophaga	72	71	0	50	16	48	0	0	0	0	0	p__"Proteobacteria":c__Betaproteobacteria:o__Burkholderiales:f__Comamonadaceae:g__Hydrogenophaga
Hydrogenophilus	7	7	0	7	5	7	0	7	7	6	0	p__"Proteobacteria":c__Betaproteobacteria:o__Hydrogenophilales:f__Hydrogenophilaceae:g__Hydrogenophilus
Hylemonella	7	6	0	6	6	0	0	0	0	0	0	p__"Proteobacteria":c__Betaproteobacteria:o__Burkholderiales:f__Comamonadaceae:g__Hylemonella
Hyphomicrobium	52	48	0	0	0	35	0	34	0	35	0	p__"Proteobacteria":c__Alphaproteobacteria:o__Rhizobiales:f__Hyphomicrobiaceae:g__Hyphomicrobium
Hyphomonas	61	60	0	0	0	59	0	10	26	0	0	p__"Proteobacteria":c__Alphaproteobacteria:o__Caulobacterales:f__Hyphomonadaceae:g__Hyphomonas
Hyunsoonleella	4	4	0	1	0	4	0	0	0	0	0	p__"Bacteroidetes":c__Flavobacteriia:o__"Flavobacteriales":f__Flavobacteriaceae:g__Hyunsoonleella
Iamia	2	1	0	1	0	1	0	0	1	1	0	p__"Actinobacteria":c__Actinobacteria:o__Acidimicrobiales:f__Iamiaceae:g__Iamia
Ideonella	8	7	0	1	0	0	0	0	0	0	0	p__"Proteobacteria":c__Betaproteobacteria:o__Burkholderiales:f__Burkholderiales_incertae_sedis:g__Ideonella
Idiomarina	107	88	0	84	42	87	0	22	0	55	7	p__"Proteobacteria":c__Gammaproteobacteria:o__Alteromonadales:f__Idiomarinaceae:g__Idiomarina
Ignatzschineria	16	14	0	14	13	14	0	8	0	2	0	p__"Proteobacteria":c__Gammaproteobacteria:o__Xanthomonadales:f__Xanthomonadaceae:g__Ignatzschineria
Ignavibacterium	2	2	0	2	2	2	0	2	2	2	0	p__"Chlorobi":c__Ignavibacteria:o__Ignavibacteriales:f__Ignavibacteriaceae:g__Ignavibacterium
Ilumatobacter	5	5	0	1	0	1	0	0	0	1	0	p__"Actinobacteria":c__Actinobacteria:o__Acidimicrobiales:f__Acidimicrobiaceae:g__Ilumatobacter
Ilyobacter	14	12	0	12	0	12	0	11	13	12	0	p__"Fusobacteria":c__Fusobacteriia:o__"Fusobacteriales":f__"Fusobacteriaceae":g__Ilyobacter
Inhella	3	3	0	0	2	2	0	0	0	0	0	p__"Proteobacteria":c__Betaproteobacteria:o__Burkholderiales:f__Burkholderiales_incertae_sedis:g__Inhella
Inquilinus	7	7	0	2	0	7	0	6	7	0	0	p__"Proteobacteria":c__Alphaproteobacteria:o__Rhodospirillales:f__Rhodospirillaceae:g__Inquilinus
Insolitispirillum	5	5	0	0	0	5	0	5	5	5	0	p__"Proteobacteria":c__Alphaproteobacteria:o__Rhodospirillales:f__Rhodospirillaceae:g__Insolitispirillum
Intrasporangium	7	5	0	0	0	0	0	1	0	0	0	p__"Actinobacteria":c__Actinobacteria:o__Actinomycetales:f__Intrasporangiaceae:g__Intrasporangium
Iodobacter	7	6	0	5	3	6	0	0	0	0	0	p__"Proteobacteria":c__Betaproteobacteria:o__Neisseriales:f__Neisseriaceae:g__Iodobacter
Isobaculum	1	1	0	1	0	0	0	0	0	0	0	p__Firmicutes:c__Bacilli:o__Lactobacillales:f__Carnobacteriaceae:g__Isobaculum
Isochromatium	1	1	0	0	1	1	0	1	0	0	0	p__"Proteobacteria":c__Gammaproteobacteria:o__Chromatiales:f__Chromatiaceae:g__Isochromatium
Isoptericola	35	34	0	7	0	20	0	0	0	0	2	p__"Actinobacteria":c__Actinobacteria:o__Actinomycetales:f__Promicromonosporaceae:g__Isoptericola
Jahnella	1	1	0	1	0	1	0	1	0	1	0	p__Nitrospinae:c__Fimbriimonadia:o__Fimbriimonadales:f__Defluviitaleaceae:g__Jahnella
Janibacter	54	53	0	25	0	0	0	0	0	0	0	p__"Actinobacteria":c__Actinobacteria:o__Actinomycetales:f__Intrasporangiaceae:g__Janibacter
Jannaschia	20	13	0	0	0	2	0	3	9	0	0	p__"Proteobacteria":c__Alphaproteobacteria:o__Rhodobacterales:f__Rhodobacteraceae:g__Jannaschia
Janthinobacterium	100	83	0	0	0	80	0	9	0	82	0	p__"Proteobacteria":c__Betaproteobacteria:o__Burkholderiales:f__Oxalobacteraceae:g__Janthinobacterium
Jejuia	2	1	0	1	0	1	0	0	0	0	0	p__"Bacteroidetes":c__Flavobacteriia:o__"Flavobacteriales":f__Flavobacteriaceae:g__Jejuia
Jeotgalibacillus	12	12	0	10	4	11	0	8	0	10	0	p__Firmicutes:c__Bacilli:o__Bacillales:f__Planococcaceae:g__Jeotgalibacillus
Jeotgalicoccus	17	16	0	12	16	16	0	0	0	15	0	p__Firmicutes:c__Bacilli:o__Bacillales:f__Staphylococcaceae:g__Jeotgalicoccus
Jonesia	12	12	0	8	10	11	0	0	0	0	0	p__"Actinobacteria":c__Actinobacteria:o__Actinomycetales:f__Jonesiaceae:g__Jonesia
Jonquetella	1	1	0	1	0	1	0	1	1	1	0	p__"Synergistetes":c__Synergistia:o__Synergistales:f__Synergistaceae:g__Jonquetella
Joostella	4	3	0	2	1	2	0	0	0	0	0	p__"Bacteroidetes":c__Flavobacteriia:o__"Flavobacteriales":f__Flavobacteriaceae:g__Joostella
Kaistia	15	14	0	0	0	13	0	13	0	0	0	p__"Proteobacteria":c__Alphaproteobacteria:o__Rhizobiales:f__Rhizobiaceae:g__Kaistia
Kandleria	3	3	0	3	3	3	0	0	1	3	0	p__Nitrospinae:c__Fimbriimonadia:o__Fimbriimonadales:f__Mooreiaceae:g__Kandleria
Kangiella	17	16	0	16	12	16	0	0	14	16	0	p__"Proteobacteria":c__Gammaproteobacteria:o__Oceanospirillales:f__Alcanivoracaceae:g__Kangiella
Kerstersia	3	3	0	0	2	0	0	0	0	0	0	p__"Proteobacteria":c__Betaproteobacteria:o__Burkholderiales:f__Alcaligenaceae:g__Kerstersia
Ketogulonicigenium	17	17	0	0	0	17	0	17	0	0	0	p__"Proteobacteria":c__Alphaproteobacteria:o__Rhodobacterales:f__Rhodobacteraceae:g__Ketogulonicigenium
Kiloniella	2	2	0	0	0	2	0	1	0	0	0	p__"Proteobacteria":c__Alphaproteobacteria:o__Kiloniellales:f__Kiloniellaceae:g__Kiloniella
Kineosphaera	2	2	0	2	0	0	0	0	0	0	0	p__"Actinobacteria":c__Actinobacteria:o__Actinomycetales:f__Dermatophilaceae:g__Kineosphaera
Kingella	8	8	0	7	7	5	0	5	0	0	0	p__"Proteobacteria":c__Betaproteobacteria:o__Neisseriales:f__Neisseriaceae:g__Kingella
Kistimonas	3	3	0	0	0	3	0	0	0	2	0	p__"Proteobacteria":c__Gammaproteobacteria:o__Oceanospirillales:f__Hahellaceae:g__Kistimonas
Kitasatospora	58	56	0	44	0	41	0	1	52	32	0	p__"Actinobacteria":c__Actinobacteria:o__Actinomycetales:f__Streptomycetaceae:g__Kitasatospora
Klebsiella	501	303	0	0	143	0	0	0	0	0	0	p__"Proteobacteria":c__Gammaproteobacteria:o__"Enterobacteriales":f__Enterobacteriaceae:g__Klebsiella
Klugiella	1	1	0	1	0	0	0	0	0	0	0	p__"Actinobacteria":c__Actinobacteria:o__Actinomycetales:f__Microbacteriaceae:g__Klugiella
Kluyvera	38	25	0	0	0	0	0	21	0	0	0	p__"Proteobacteria":c__Gammaproteobacteria:o__"Enterobacteriales":f__Enterobacteriaceae:g__Kluyvera
Knoellia	17	17	0	2	0	0	0	0	0	0	0	p__"Actinobacteria":c__Actinobacteria:o__Actinomycetales:f__Intrasporangiaceae:g__Knoellia
Kocuria	195	194	0	164	0	56	0	60	0	21	0	p__"Actinobacteria":c__Actinobacteria:o__Actinomycetales:f__Micrococcaceae:g__Kocuria
Komagataeibacter	70	1	0	0	0	0	0	19	0	14	0	p__Nitrospinae:c__Fimbriimonadia:o__Magnetococcales:f__Magnetococcaceae:g__Komagataeibacter
Kordia	5	5	0	4	3	5	0	0	1	4	0	p__"Bacteroidetes":c__Flavobacteriia:o__"Flavobacteriales":f__Flavobacteriaceae:g__Kordia
Kordiimonas	4	4	0	0	0	4	0	2	0	3	0	p__"Proteobacteria":c__Alphaproteobacteria:o__Kordiimonadales:f__"Kordiimonadaceae":g__Kordiimonas
Kosakonia	37	22	0	0	19	22	0	20	0	0	0	p__Nitrospinae:c__Fimbriimonadia:o__Magnetococcales:f__SAR11:g__Kosakonia
Kosmotoga	3	3	0	2	3	3	0	1	3	2	0	p__"Thermotogae":c__Thermotogae:o__Kosmotogales:f__Kosmotogaceae:g__Kosmotoga
Kozakia	9	9	0	0	0	0	0	8	0	9	0	p__"Proteobacteria":c__Alphaproteobacteria:o__Rhodospirillales:f__Acetobacteraceae:g__Kozakia
Kribbella	38	38	0	23	0	38	0	0	27	8	0	p__"Actinobacteria":c__Actinobacteria:o__Actinomycetales:f__Nocardioidaceae:g__Kribbella
Kribbia	3	2	0	2	0	0	0	2	0	0	0	p__"Actinobacteria":c__Actinobacteria:o__Actinomycetales:f__Intrasporangiaceae:g__Kribbia
Kroppenstedtia	1	1	0	1	1	1	0	0	0	0	0	p__Nitrospinae:c__Fimbriimonadia:o__Magnetococcales:f__SAR11:g__Kroppenstedtia
Ktedonobacter	2	2	0	2	0	2	0	0	0	2	0	p__"Chloroflexi":c__Ktedonobacteria:o__Ktedonobacterales:f__Ktedonobacteraceae:g__Ktedonobacter
Kurthia	29	26	0	20	13	0	0	13	0	20	0	p__Firmicutes:c__Bacilli:o__Bacillales:f__Planococcaceae:g__Kurthia
Kushneria	6	6	0	6	4	5	0	6	6	6	0	p__"Proteobacteria":c__Gammaproteobacteria:o__Oceanospirillales:f__Halomonadaceae:g__Kushneria
Kyrpidia	8	8	0	8	8	8	0	8	8	8	0	p__Nitrospinae:c__Fimbriimonadia:o__Fimbriimonadales:f__Mooreiaceae:g__Kyrpidia
Kytococcus	12	12	0	12	0	12	0	0	0	0	0	p__"Actinobacteria":c__Actinobacteria:o__Actinomycetales:f__Dermacoccaceae:g__Kytococcus
Labedella	5	2	0	2	0	0	0	0	0	0	0	p__"Actinobacteria":c__Actinobacteria:o__Actinomycetales:f__Microbacteriaceae:g__Labedella
Labrenzia	16	16	0	0	0	0	0	4	0	0	0	p__"Proteobacteria":c__Alphaproteobacteria:o__Rhodobacterales:f__Rhodobacteraceae:g__Labrenzia
Labrys	14	14	0	0	0	12	0	14	5	4	0	p__"Proteobacteria":c__Alphaproteobacteria:o__Rhizobiales:f__Xanthobacteraceae:g__Labrys
Lachnoanaerobaculum	1	1	0	1	0	1	0	1	1	1	1	p__Nitrospinae:c__Fimbriimonadia:o__Fimbriimonadales:f__Mooreiaceae:g__Lachnoanaerobaculum
Lachnobacterium	5	5	0	5	0	5	0	4	0	5	0	p__Firmicutes:c__Clostridia:o__Clostridiales:f__Lachnospiraceae:g__Lachnobacterium
Lachnospira	10	8	0	1	0	8	0	0	0	4	0	p__Firmicutes:c__Clostridia:o__Clostridiales:f__Lachnospiraceae:g__Lachnospira
Lacinutrix	29	28	0	10	3	0	0	0	0	2	0	p__"Bacteroidetes":c__Flavobacteriia:o__"Flavobacteriales":f__Flavobacteriaceae:g__Lacinutrix
Lactobacillus	3349	3334	13	2594	2298	2102	0	967	813	517	0	p__Firmicutes:c__Bacilli:o__Lactobacillales:f__Lactobacillaceae:g__Lactobacillus
Lactococcus	563	557	0	475	473	550	0	472	428	479	0	p__Firmicutes:c__Bacilli:o__Lactobacillales:f__Streptococcaceae:g__Lactococcus
Lactovum	1	1	0	1	1	1	0	1	1	1	0	p__Firmicutes:c__Bacilli:o__Lactobacillales:f__Streptococcaceae:g__Lactovum
Lampropedia	7	7	0	7	7	0	0	6	0	7	0	p__"Proteobacteria":c__Betaproteobacteria:o__Burkholderiales:f__Comamonadaceae:g__Lampropedia
Lapillicoccus	2	2	0	2	0	0	0	0	0	0	0	p__"Actinobacteria":c__Actinobacteria:o__Actinomycetales:f__Intrasporangiaceae:g__Lapillicoccus
Laribacter	12	12	0	12	0	12	0	12	0	4	0	p__"Proteobacteria":c__Betaproteobacteria:o__Neisseriales:f__Neisseriaceae:g__Laribacter
Lawsonia	7	7	0	7	7	7	0	7	7	7	0	p__"Proteobacteria":c__Deltaproteobacteria:o__Desulfovibrionales:f__Desulfovibrionaceae:g__Lawsonia
Leclercia	22	0	0	0	0	0	0	0	0	0	0	p__"Proteobacteria":c__Gammaproteobacteria:o__"Enterobacteriales":f__Enterobacteriaceae:g__Leclercia
Leeuwenhoekiella	15	15	0	15	5	15	0	0	6	14	0	p__"Bacteroidetes":c__Flavobacteriia:o__"Flavobacteriales":f__Flavobacteriaceae:g__Leeuwenhoekiella
Legionella	147	147	0	142	129	139	0	108	0	111	0	p__"Proteobacteria":c__Gammaproteobacteria:o__Legionellales:f__Legionellaceae:g__Legionella
Leifsonia	88	57	0	39	0	0	0	1	0	0	0	p__"Actinobacteria":c__Actinobacteria:o__Actinomycetales:f__Microbacteriaceae:g__Leifsonia
Leisingera	9	8	0	0	0	9	0	2	0	0	0	p__"Proteobacteria":c__Alphaproteobacteria:o__Rhodobacterales:f__Rhodobacteraceae:g__Leisingera
Lelliottia	11	1	0	0	0	0	0	0	0	0	0	p__Nitrospinae:c__Fimbriimonadia:o__Magnetococcales:f__SAR11:g__Lelliottia
Leminorella	2	1	0	0	1	0	0	0	0	0	0	p__"Proteobacteria":c__Gammaproteobacteria:o__"Enterobacteriales":f__Enterobacteriaceae:g__Leminorella
Lentibacillus	6	6	0	6	6	6	0	6	0	4	0	p__Firmicutes:c__Bacilli:o__Bacillales:f__Bacillaceae 2:g__Lentibacillus
Lentisphaera	5	5	0	5	0	5	0	3	5	2	0	p__"Lentisphaerae":c__"Lentisphaeria":o__Lentisphaerales:f__"Lentisphaeraceae":g__Lentisphaera
Lentzea	1	0	0	0	0	0	0	0	0	0	0	p__"Actinobacteria":c__Actinobacteria:o__Actinomycetales:f__Pseudonocardiaceae:g__Lentzea
Leptobacterium	5	5	0	5	5	5	0	0	0	5	0	p__"Bacteroidetes":c__Flavobacteriia:o__"Flavobacteriales":f__Flavobacteriaceae:g__Leptobacterium
Leptolinea	1	1	0	1	0	1	0	1	0	1	0	p__"Chloroflexi":c__Anaerolineae:o__Anaerolineales:f__Anaerolineaceae:g__Leptolinea
Leptonema	4	4	0	3	0	4	0	0	4	4	0	p__"Spirochaetes":c__Spirochaetia:o__Spirochaetales:f__Leptospiraceae:g__Leptonema
Leptospira	143	143	0	141	86	137	0	0	135	130	1	p__"Spirochaetes":c__Spirochaetia:o__Spirochaetales:f__Leptospiraceae:g__Leptospira
Leptospirillum	4	3	0	3	3	3	0	3	3	2	0	p__Nitrospirae:c__"Nitrospira":o__"Nitrospirales":f__"Nitrospiraceae":g__Leptospirillum
Leptothrix	17	9	0	6	0	0	0	0	0	0	0	p__"Proteobacteria":c__Betaproteobacteria:o__Burkholderiales:f__Burkholderiales_incertae_sedis:g__Leptothrix
Leptotrichia	32	31	0	27	0	24	0	23	24	20	0	p__"Fusobacteria":c__Fusobacteriia:o__"Fusobacteriales":f__"Leptotrichiaceae":g__Leptotrichia
Leucobacter	51	50	0	38	0	13	2	43	32	4	0	p__"Actinobacteria":c__Actinobacteria:o__Actinomycetales:f__Microbacteriaceae:g__Leucobacter
Leuconostoc	539	534	0	531	532	526	0	528	369	525	0	p__Firmicutes:c__Bacilli:o__Lactobacillales:f__Leuconostocaceae:g__Leuconostoc
Leucothrix	2	2	0	2	1	1	0	0	1	1	0	p__"Proteobacteria":c__Gammaproteobacteria:o__Thiotrichales:f__Thiotrichaceae:g__Leucothrix
Levilinea	1	1	0	1	0	1	0	1	0	1	0	p__"Chloroflexi":c__Anaerolineae:o__Anaerolineales:f__Anaerolineaceae:g__Levilinea
Lewinella	11	11	0	7	8	8	0	5	4	7	0	p__"Bacteroidetes":c__Sphingobacteriia:o__"Sphingobacteriales":f__"Saprospiraceae":g__Lewinella
Lihuaxuella	2	2	0	2	0	1	0	1	0	0	0	p__Nitrospinae:c__Thermoflexia:o__Candidatus Brocadiales:f__Candidatus Brocadiaceae:g__Lihuaxuella
Limibacter	3	3	0	3	3	3	0	0	3	3	0	p__"Bacteroidetes":c__Sphingobacteriia:o__"Sphingobacteriales":f__Flammeovirgaceae:g__Limibacter
Limnobacter	10	10	0	7	8	2	0	10	0	0	0	p__"Proteobacteria":c__Betaproteobacteria:o__Burkholderiales:f__Burkholderiaceae:g__Limnobacter
Limnohabitans	12	12	0	0	12	0	0	4	0	0	0	p__"Proteobacteria":c__Betaproteobacteria:o__Burkholderiales:f__Comamonadaceae:g__Limnohabitans
Listeria	402	402	0	396	400	395	0	392	400	368	0	p__Firmicutes:c__Bacilli:o__Bacillales:f__Listeriaceae:g__Listeria
Listonella	7	0	0	0	7	0	0	1	0	0	0	p__"Proteobacteria":c__Gammaproteobacteria:o__"Vibrionales":f__Vibrionaceae:g__Listonella
Litoreibacter	6	5	0	0	0	5	0	2	0	0	0	p__"Proteobacteria":c__Alphaproteobacteria:o__Rhodobacterales:f__Rhodobacteraceae:g__Litoreibacter
Litoribacter	1	1	0	1	1	1	0	0	0	1	0	p__"Bacteroidetes":c__Sphingobacteriia:o__"Sphingobacteriales":f__Cytophagaceae:g__Litoribacter
Litoricola	4	4	0	4	4	4	0	2	4	4	0	p__"Proteobacteria":c__Gammaproteobacteria:o__Oceanospirillales:f__Litoricolaceae:g__Litoricola
Litorimonas	2	2	0	0	0	0	0	0	0	0	0	p__"Proteobacteria":c__Alphaproteobacteria:o__Caulobacterales:f__Hyphomonadaceae:g__Litorimonas
Litorisediminicola	1	1	0	0	0	1	0	1	0	0	0	p__Nitrospinae:c__Fimbriimonadia:o__Fimbriimonadales:f__Defluviitaleaceae:g__Litorisediminicola
Loktanella	73	68	0	0	0	7	0	47	0	0	0	p__"Proteobacteria":c__Alphaproteobacteria:o__Rhodobacterales:f__Rhodobacteraceae:g__Loktanella
Lonepinella	3	3	0	3	3	3	0	0	0	0	0	p__"Proteobacteria":c__Gammaproteobacteria:o__Pasteurellales:f__Pasteurellaceae:g__Lonepinella
Longilinea	1	1	0	1	0	1	0	1	0	1	0	p__"Chloroflexi":c__Anaerolineae:o__Anaerolineales:f__Anaerolineaceae:g__Longilinea
Lonsdalea	12	10	0	0	9	5	0	3	0	8	0	p__Nitrospinae:c__Thermoflexia:o__Candidatus Brocadiales:f__Candidatus Brocadiaceae:g__Lonsdalea
Luteibacter	13	13	0	7	9	8	0	0	0	8	2	p__"Proteobacteria":c__Gammaproteobacteria:o__Xanthomonadales:f__Xanthomonadaceae:g__Luteibacter
Luteimicrobium	2	1	0	1	0	0	0	0	0	0	0	p__"Actinobacteria":c__Actinobacteria:o__Actinomycetales:f__Micrococcineae_incertae_sedis:g__Luteimicrobium
Luteimonas	22	16	0	6	3	19	0	0	0	14	0	p__"Proteobacteria":c__Gammaproteobacteria:o__Xanthomonadales:f__Xanthomonadaceae:g__Luteimonas
Luteipulveratus	1	1	0	1	0	0	0	0	0	0	0	p__"Actinobacteria":c__Actinobacteria:o__Actinomycetales:f__Dermacoccaceae:g__Luteipulveratus
Luteococcus	3	3	0	2	0	2	0	0	3	1	0	p__"Actinobacteria":c__Actinobacteria:o__Actinomycetales:f__Propionibacteriaceae:g__Luteococcus
Luteolibacter	4	4	0	3	4	1	0	4	3	1	0	p__"Verrucomicrobia":c__Verrucomicrobiae:o__Verrucomicrobiales:f__Verrucomicrobiaceae:g__Luteolibacter
Lutibacter	10	10	0	3	0	10	0	0	3	10	0	p__"Bacteroidetes":c__Flavobacteriia:o__"Flavobacteriales":f__Flavobacteriaceae:g__Lutibacter
Lutibaculum	1	1	0	0	0	1	0	1	0	0	0	p__Nitrospinae:c__Fimbriimonadia:o__Magnetococcales:f__SAR11:g__Lutibaculum
Lutimaribacter	2	1	0	0	0	0	0	1	0	0	0	p__"Proteobacteria":c__Alphaproteobacteria:o__Rhodobacterales:f__Rhodobacteraceae:g__Lutimaribacter
Lutimonas	4	2	0	3	0	0	0	0	0	0	0	p__"Bacteroidetes":c__Flavobacteriia:o__"Flavobacteriales":f__Flavobacteriaceae:g__Lutimonas
Lutispora	1	1	0	1	0	1	0	1	1	1	0	p__Firmicutes:c__Erysipelotrichia:o__Erysipelotrichales:f__Bacillales_incertae_sedis:g__Lutispora
Lysinibacillus	325	305	0	232	304	0	0	277	0	290	0	p__Firmicutes:c__Erysipelotrichia:o__Erysipelotrichales:f__Bacillales_incertae_sedis:g__Lysinibacillus
Lysinimicrobium	1	1	0	1	0	0	0	0	0	0	0	p__Nitrospinae:c__Fimbriimonadia:o__Fimbriimonadales:f__Defluviitaleaceae:g__Lysinimicrobium
Lysobacter	75	72	0	41	32	49	0	0	0	7	0	p__"Proteobacteria":c__Gammaproteobacteria:o__Xanthomonadales:f__Xanthomonadaceae:g__Lysobacter
Macrococcus	18	17	0	17	17	0	0	7	6	15	0	p__Firmicutes:c__Bacilli:o__Bacillales:f__Staphylococcaceae:g__Macrococcus
Macromonas	1	1	0	1	1	1	0	1	0	0	0	p__"Proteobacteria":c__Betaproteobacteria:o__Burkholderiales:f__Comamonadaceae:g__Macromonas
Magnetococcus	4	4	0	3	0	3	0	3	0	3	0	p__Nitrospinae:c__Fimbriimonadia:o__Magnetococcales:f__Magnetococcaceae:g__Magnetococcus
Magnetospira	3	3	0	0	0	3	0	0	0	1	0	p__Nitrospinae:c__Fimbriimonadia:o__Fimbriimonadales:f__Mooreiaceae:g__Magnetospira
Magnetospirillum	27	27	0	0	0	26	0	16	0	20	0	p__"Proteobacteria":c__Alphaproteobacteria:o__Rhodospirillales:f__Rhodospirillaceae:g__Magnetospirillum
Mahella	4	4	0	4	0	4	0	4	4	4	0	p__Firmicutes:c__Clostridia:o__Clostridiales:f__Clostridiales_Incertae Sedis IV:g__Mahella
Malikia	4	4	0	0	1	0	0	0	0	4	0	p__"Proteobacteria":c__Betaproteobacteria:o__Burkholderiales:f__Comamonadaceae:g__Malikia
Malonomonas	1	1	0	1	1	0	0	1	0	0	0	p__"Proteobacteria":c__Deltaproteobacteria:o__Desulfuromonadales:f__Desulfuromonadaceae:g__Malonomonas
Mangrovibacter	3	3	0	0	1	0	0	0	0	0	0	p__"Proteobacteria":c__Gammaproteobacteria:o__"Enterobacteriales":f__Enterobacteriaceae:g__Mangrovibacter
Mangroviflexus	1	1	0	1	1	1	0	0	1	1	0	p__"Bacteroidetes":c__"Bacteroidia":o__"Bacteroidales":f__Marinilabiliaceae:g__Mangroviflexus
Mannheimia	110	100	0	78	68	64	0	0	0	100	0	p__"Proteobacteria":c__Gammaproteobacteria:o__Pasteurellales:f__Pasteurellaceae:g__Mannheimia
Maribacter	6	5	0	2	0	1	0	0	1	0	0	p__"Bacteroidetes":c__Flavobacteriia:o__"Flavobacteriales":f__Flavobacteriaceae:g__Maribacter
Maribius	2	2	0	0	0	0	0	2	0	0	0	p__"Proteobacteria":c__Alphaproteobacteria:o__Rhodobacterales:f__Rhodobacteraceae:g__Maribius
Maricaulis	26	23	0	0	0	23	0	7	22	0	0	p__"Proteobacteria":c__Alphaproteobacteria:o__Caulobacterales:f__Hyphomonadaceae:g__Maricaulis
Marichromatium	33	33	0	31	30	33	0	32	10	30	0	p__"Proteobacteria":c__Gammaproteobacteria:o__Chromatiales:f__Chromatiaceae:g__Marichromatium
Marihabitans	1	1	0	1	0	1	0	1	0	0	0	p__"Actinobacteria":c__Actinobacteria:o__Actinomycetales:f__Intrasporangiaceae:g__Marihabitans
Marinicauda	1	1	0	0	0	1	0	1	0	0	0	p__Nitrospinae:c__Fimbriimonadia:o__Fimbriimonadales:f__Defluviitaleaceae:g__Marinicauda
Mariniflexile	6	5	0	4	0	2	0	0	0	0	0	p__"Bacteroidetes":c__Flavobacteriia:o__"Flavobacteriales":f__Flavobacteriaceae:g__Mariniflexile
Marinilabilia	3	3	0	2	0	3	0	0	0	0	0	p__"Bacteroidetes":c__"Bacteroidia":o__"Bacteroidales":f__Marinilabiliaceae:g__Marinilabilia
Marinilactibacillus	27	27	0	24	24	0	0	24	0	0	0	p__Firmicutes:c__Bacilli:o__Lactobacillales:f__Carnobacteriaceae:g__Marinilactibacillus
Marinimicrobium	9	7	0	6	3	6	0	3	0	5	0	p__"Proteobacteria":c__Gammaproteobacteria:o__Alteromonadales:f__Alteromonadaceae:g__Marinimicrobium
Marininema	2	2	0	2	2	2	0	2	0	2	0	p__Nitrospinae:c__Fimbriimonadia:o__Magnetococcales:f__SAR11:g__Marininema
Marinithermus	4	4	0	4	4	4	0	4	4	4	0	p__"Deinococcus-Thermus":c__Deinococci:o__Thermales:f__Thermaceae:g__Marinithermus
Marinitoga	1	1	0	1	1	1	0	1	1	1	0	p__"Thermotogae":c__Thermotogae:o__Petrotogales:f__Petrotogaceae:g__Marinitoga
Marinobacter	331	328	0	159	179	315	0	0	269	260	0	p__"Proteobacteria":c__Gammaproteobacteria:o__Alteromonadales:f__Alteromonadaceae:g__Marinobacter
Marinobacterium	27	27	0	13	13	23	0	0	0	12	0	p__"Proteobacteria":c__Gammaproteobacteria:o__Oceanospirillales:f__Oceanospirillaceae:g__Marinobacterium
Marinococcus	20	18	0	18	18	18	0	14	0	18	0	p__Firmicutes:c__Bacilli:o__Bacillales:f__Bacillaceae 2:g__Marinococcus
Marinomonas	157	156	0	133	74	146	0	0	0	51	0	p__"Proteobacteria":c__Gammaproteobacteria:o__Oceanospirillales:f__Oceanospirillaceae:g__Marinomonas
Marinoscillum	3	3	0	3	3	3	0	0	1	3	0	p__"Bacteroidetes":c__Sphingobacteriia:o__"Sphingobacteriales":f__Flammeovirgaceae:g__Marinoscillum
Marinospirillum	11	11	0	6	8	9	0	0	9	9	0	p__"Proteobacteria":c__Gammaproteobacteria:o__Oceanospirillales:f__Oceanospirillaceae:g__Marinospirillum
Marinovum	5	2	0	0	0	0	0	0	0	0	0	p__"Proteobacteria":c__Alphaproteobacteria:o__Rhodobacterales:f__Rhodobacteraceae:g__Marinovum
Marisediminicola	4	3	0	3	0	0	0	0	0	0	0	p__"Actinobacteria":c__Actinobacteria:o__Actinomycetales:f__Microbacteriaceae:g__Marisediminicola
Marispirillum	1	1	0	0	0	1	0	1	0	1	0	p__"Proteobacteria":c__Alphaproteobacteria:o__Rhodospirillales:f__Rhodospirillaceae:g__Marispirillum
Maritalea	1	1	0	0	0	0	0	1	0	0	0	p__"Proteobacteria":c__Alphaproteobacteria:o__Rhizobiales:f__Hyphomicrobiaceae:g__Maritalea
Maritimibacter	3	1	0	0	0	0	0	0	0	0	0	p__"Proteobacteria":c__Alphaproteobacteria:o__Rhodobacterales:f__Rhodobacteraceae:g__Maritimibacter
Maritimimonas	1	1	0	1	1	1	0	0	0	1	0	p__"Bacteroidetes":c__Flavobacteriia:o__"Flavobacteriales":f__Flavobacteriaceae:g__Maritimimonas
Marivirga	2	1	0	1	0	0	0	0	0	0	0	p__"Bacteroidetes":c__Sphingobacteriia:o__"Sphingobacteriales":f__Flammeovirgaceae:g__Marivirga
Marivita	4	4	0	0	0	0	0	2	0	0	0	p__"Proteobacteria":c__Alphaproteobacteria:o__Rhodobacterales:f__Rhodobacteraceae:g__Marivita
Marmoricola	16	14	0	1	0	5	0	2	0	0	0	p__"Actinobacteria":c__Actinobacteria:o__Actinomycetales:f__Nocardioidaceae:g__Marmoricola
Martelella	1	1	0	0	0	0	0	0	0	0	0	p__"Proteobacteria":c__Alphaproteobacteria:o__Rhizobiales:f__"Aurantimonadaceae":g__Martelella
Marvinbryantia	1	1	0	1	0	1	0	1	1	1	0	p__Firmicutes:c__Erysipelotrichia:o__Erysipelotrichales:f__Bacillales_incertae_sedis:g__Marvinbryantia
Massilia	141	135	0	82	12	106	0	8	0	137	0	p__"Proteobacteria":c__Betaproteobacteria:o__Burkholderiales:f__Oxalobacteraceae:g__Massilia
Mechercharimyces	6	6	0	6	6	6	0	6	4	6	0	p__Firmicutes:c__Bacilli:o__Bacillales:f__Thermoactinomycetaceae 2:g__Mechercharimyces
Megamonas	8	8	0	7	7	8	0	5	8	7	0	p__Firmicutes:c__Erysipelotrichia:o__Natranaerobiales:f__Natranaerobiaceae:g__Megamonas
Meganema	1	1	0	0	0	1	0	1	0	0	0	p__"Proteobacteria":c__Alphaproteobacteria:o__Rhizobiales:f__Methylobacteriaceae:g__Meganema
Megasphaera	30	30	0	27	23	28	0	18	28	30	0	p__Firmicutes:c__Clostridia:o__Clostridiales:f__Veillonellaceae:g__Megasphaera
Meiothermus	79	79	0	75	0	79	0	58	55	77	0	p__"Deinococcus-Thermus":c__Deinococci:o__Thermales:f__Thermaceae:g__Meiothermus
Melghirimyces	1	1	0	1	1	1	0	0	1	1	0	p__Nitrospinae:c__Fimbriimonadia:o__Fimbriimonadales:f__Fimbriimonadaceae:g__Melghirimyces
Melissococcus	42	42	0	42	42	0	0	42	0	41	0	p__Firmicutes:c__Bacilli:o__Lactobacillales:f__Enterococcaceae:g__Melissococcus
Meridianimaribacter	1	1	0	1	0	0	0	0	0	0	0	p__"Bacteroidetes":c__Flavobacteriia:o__"Flavobacteriales":f__Flavobacteriaceae:g__Meridianimaribacter
Mesoflavibacter	3	2	0	1	0	0	0	0	0	0	0	p__"Bacteroidetes":c__Flavobacteriia:o__"Flavobacteriales":f__Flavobacteriaceae:g__Mesoflavibacter
Mesonia	6	6	0	4	5	1	0	0	0	0	0	p__"Bacteroidetes":c__Flavobacteriia:o__"Flavobacteriales":f__Flavobacteriaceae:g__Mesonia
Mesoplasma	17	17	0	17	15	17	0	0	14	17	0	p__"Tenericutes":c__Mollicutes:o__Entomoplasmatales:f__Entomoplasmataceae:g__Mesoplasma
Mesorhizobium	48	26	0	0	0	5	0	6	0	23	0	p__"Proteobacteria":c__Alphaproteobacteria:o__Rhizobiales:f__Phyllobacteriaceae:g__Mesorhizobium
Metascardovia	1	1	0	1	0	0	0	1	0	0	0	p__"Actinobacteria":c__Actinobacteria:o__Bifidobacteriales:f__Bifidobacteriaceae:g__Metascardovia
Methylibium	10	4	0	0	3	0	0	0	0	0	0	p__"Proteobacteria":c__Betaproteobacteria:o__Burkholderiales:f__Burkholderiales_incertae_sedis:g__Methylibium
Methylobacillus	4	3	0	3	2	2	0	0	0	0	0	p__"Proteobacteria":c__Betaproteobacteria:o__Methylophilales:f__Methylophilaceae:g__Methylobacillus
Methylobacter	11	9	0	4	6	3	0	0	0	2	0	p__"Proteobacteria":c__Gammaproteobacteria:o__Methylococcales:f__Methylococcaceae:g__Methylobacter
Methylobacterium	652	647	0	0	0	614	0	377	521	370	0	p__"Proteobacteria":c__Alphaproteobacteria:o__Rhizobiales:f__Methylobacteriaceae:g__Methylobacterium
Methylocaldum	8	8	0	7	3	8	0	6	0	4	0	p__"Proteobacteria":c__Gammaproteobacteria:o__Methylococcales:f__Methylococcaceae:g__Methylocaldum
Methylocapsa	2	2	0	0	0	1	0	1	0	0	0	p__"Proteobacteria":c__Alphaproteobacteria:o__Rhizobiales:f__Beijerinckiaceae:g__Methylocapsa
Methylocella	10	10	0	0	0	4	0	10	0	10	0	p__"Proteobacteria":c__Alphaproteobacteria:o__Rhizobiales:f__Beijerinckiaceae:g__Methylocella
Methylococcus	11	9	0	6	6	7	0	0	0	0	0	p__"Proteobacteria":c__Gammaproteobacteria:o__Methylococcales:f__Methylococcaceae:g__Methylococcus
Methylocystis	57	53	0	0	0	39	0	44	0	33	0	p__"Proteobacteria":c__Alphaproteobacteria:o__Rhizobiales:f__Methylocystaceae:g__Methylocystis
Methylohalobius	1	1	0	1	1	1	0	0	0	1	0	p__"Proteobacteria":c__Gammaproteobacteria:o__Methylococcales:f__Methylococcaceae:g__Methylohalobius
Methylomarinum	2	2	0	2	1	2	0	0	0	2	0	p__Nitrospinae:c__Fimbriimonadia:o__Fimbriimonadales:f__Fimbriimonadaceae:g__Methylomarinum
Methylomicrobium	13	10	0	0	8	12	0	10	8	6	0	p__"Proteobacteria":c__Gammaproteobacteria:o__Methylococcales:f__Methylococcaceae:g__Methylomicrobium
Methylomonas	43	40	0	19	36	36	0	2	0	14	0	p__"Proteobacteria":c__Gammaproteobacteria:o__Methylococcales:f__Methylococcaceae:g__Methylomonas
Methylophaga	28	28	0	26	20	27	0	11	0	25	0	p__"Proteobacteria":c__Gammaproteobacteria:o__Thiotrichales:f__Piscirickettsiaceae:g__Methylophaga
Methylophilus	14	14	0	12	10	13	0	7	12	11	0	p__"Proteobacteria":c__Betaproteobacteria:o__Methylophilales:f__Methylophilaceae:g__Methylophilus
Methylorosula	1	1	0	0	0	1	0	1	0	1	0	p__Nitrospinae:c__Fimbriimonadia:o__Fimbriimonadales:f__Defluviitaleaceae:g__Methylorosula
Methylosarcina	3	3	0	0	3	2	0	0	0	2	0	p__"Proteobacteria":c__Gammaproteobacteria:o__Methylococcales:f__Methylococcaceae:g__Methylosarcina
Methylosinus	38	22	0	0	0	10	0	14	0	0	0	p__"Proteobacteria":c__Alphaproteobacteria:o__Rhizobiales:f__Methylocystaceae:g__Methylosinus
Methylosoma	1	1	0	1	1	1	0	0	0	1	0	p__"Proteobacteria":c__Gammaproteobacteria:o__Methylococcales:f__Methylococcaceae:g__Methylosoma
Methylosphaera	2	2	0	2	2	2	0	2	0	2	0	p__"Proteobacteria":c__Gammaproteobacteria:o__Methylococcales:f__Methylococcaceae:g__Methylosphaera
Methylotenera	7	6	0	3	2	0	0	6	0	0	0	p__"Proteobacteria":c__Betaproteobacteria:o__Methylophilales:f__Methylophilaceae:g__Methylotenera
Methylothermus	1	1	0	0	1	1	0	1	0	1	0	p__"Proteobacteria":c__Gammaproteobacteria:o__Methylococcales:f__Methylococcaceae:g__Methylothermus
Methyloversatilis	5	5	0	0	3	0	0	5	0	0	0	p__"Proteobacteria":c__Betaproteobacteria:o__Rhodocyclales:f__Rhodocyclaceae:g__Methyloversatilis
Methylovorus	5	5	0	0	5	5	0	0	0	0	0	p__"Proteobacteria":c__Betaproteobacteria:o__Methylophilales:f__Methylophilaceae:g__Methylovorus
Methylovulum	1	1	0	1	1	1	0	1	0	1	0	p__"Proteobacteria":c__Gammaproteobacteria:o__Methylococcales:f__Methylococcaceae:g__Methylovulum
Microbacterium	743	732	0	347	0	0	0	26	649	0	0	p__"Actinobacteria":c__Actinobacteria:o__Actinomycetales:f__Microbacteriaceae:g__Microbacterium
Microbispora	53	52	0	27	0	21	0	3	1	0	0	p__"Actinobacteria":c__Actinobacteria:o__Actinomycetales:f__Streptosporangiaceae:g__Microbispora
Microbulbifer	59	58	0	11	39	57	0	0	0	52	0	p__"Proteobacteria":c__Gammaproteobacteria:o__Alteromonadales:f__Alteromonadaceae:g__Microbulbifer
Microcella	10	10	0	7	0	7	0	0	0	0	0	p__"Actinobacteria":c__Actinobacteria:o__Actinomycetales:f__Microbacteriaceae:g__Microcella
Micrococcus	222	206	0	187	0	185	0	194	0	0	0	p__"Actinobacteria":c__Actinobacteria:o__Actinomycetales:f__Micrococcaceae:g__Micrococcus
Microlunatus	19	17	0	12	0	11	0	0	8	7	0	p__"Actinobacteria":c__Actinobacteria:o__Actinomycetales:f__Propionibacteriaceae:g__Microlunatus
Micromonospora	52	50	0	31	0	13	0	0	51	46	0	p__"Actinobacteria":c__Actinobacteria:o__Actinomycetales:f__Micromonosporaceae:g__Micromonospora
Micropolyspora	1	0	0	1	0	0	0	0	0	0	0	P__"Actinobacteria":C__Actinobacteria:O__Actinomycetales:F__Nocardiaceae:G__Micropolyspora
Micropruina	1	1	0	1	0	1	0	0	0	0	0	p__"Actinobacteria":c__Actinobacteria:o__Actinomycetales:f__Propionibacteriaceae:g__Micropruina
Microscilla	4	1	0	1	1	1	0	0	0	1	0	p__"Bacteroidetes":c__Sphingobacteriia:o__"Sphingobacteriales":f__Cytophagaceae:g__Microscilla
Microtetraspora	5	5	0	5	0	5	0	0	0	0	0	p__"Actinobacteria":c__Actinobacteria:o__Actinomycetales:f__Streptosporangiaceae:g__Microtetraspora
Microvirga	26	24	0	0	0	23	0	10	0	7	0	p__"Proteobacteria":c__Alphaproteobacteria:o__Rhizobiales:f__Methylobacteriaceae:g__Microvirga
Microvirgula	4	4	0	0	4	4	0	1	0	0	0	p__"Proteobacteria":c__Betaproteobacteria:o__Neisseriales:f__Neisseriaceae:g__Microvirgula
Mitsuaria	11	5	0	0	8	0	0	0	0	0	0	p__"Proteobacteria":c__Betaproteobacteria:o__Burkholderiales:f__Burkholderiales_incertae_sedis:g__Mitsuaria
Mitsuokella	3	3	0	3	2	3	0	2	0	3	0	p__Firmicutes:c__Erysipelotrichia:o__Natranaerobiales:f__Natranaerobiaceae:g__Mitsuokella
Mobilicoccus	2	2	0	1	0	0	0	0	0	1	0	p__"Actinobacteria":c__Actinobacteria:o__Actinomycetales:f__Dermatophilaceae:g__Mobilicoccus
Mobiluncus	16	16	0	16	16	16	0	0	15	16	0	p__"Actinobacteria":c__Actinobacteria:o__Actinomycetales:f__Actinomycetaceae:g__Mobiluncus
Modicisalibacter	1	1	0	0	1	1	0	0	0	1	0	p__"Proteobacteria":c__Gammaproteobacteria:o__Oceanospirillales:f__Halomonadaceae:g__Modicisalibacter
Mogibacterium	8	8	0	8	0	8	0	0	8	8	0	p__Firmicutes:c__Clostridia:o__Clostridiales:f__Clostridiales_Incertae Sedis XIII:g__Mogibacterium
Moorella	19	19	0	19	19	19	0	17	18	18	0	p__Firmicutes:c__Clostridia:o__Thermoanaerobacterales:f__Thermoanaerobacteraceae:g__Moorella
Moraxella	105	74	0	58	59	72	0	0	43	53	0	p__"Proteobacteria":c__Gammaproteobacteria:o__Pseudomonadales:f__Moraxellaceae:g__Moraxella
Morganella	41	41	0	33	29	40	0	0	0	38	0	p__"Proteobacteria":c__Gammaproteobacteria:o__"Enterobacteriales":f__Enterobacteriaceae:g__Morganella
Moritella	70	70	0	70	40	0	0	22	55	68	0	p__"Proteobacteria":c__Gammaproteobacteria:o__Alteromonadales:f__Moritellaceae:g__Moritella
Moryella	1	1	0	1	0	1	0	1	1	1	0	p__Firmicutes:c__Clostridia:o__Clostridiales:f__Lachnospiraceae:g__Moryella
Mucilaginibacter	3	3	0	3	3	2	0	0	1	3	0	p__"Bacteroidetes":c__Sphingobacteriia:o__"Sphingobacteriales":f__Sphingobacteriaceae:g__Mucilaginibacter
Mucispirillum	3	3	0	2	2	3	0	2	2	2	0	p__"Deferribacteres":c__Deferribacteres:o__Deferribacterales:f__Deferribacteraceae:g__Mucispirillum
Muricauda	4	4	0	3	2	4	0	0	0	4	0	p__"Bacteroidetes":c__Flavobacteriia:o__"Flavobacteriales":f__Flavobacteriaceae:g__Muricauda
Muriicola	2	2	0	1	1	2	0	0	1	1	0	p__"Bacteroidetes":c__Flavobacteriia:o__"Flavobacteriales":f__Flavobacteriaceae:g__Muriicola
Myceligenerans	6	6	0	2	1	6	0	0	2	0	0	p__"Actinobacteria":c__Actinobacteria:o__Actinomycetales:f__Promicromonosporaceae:g__Myceligenerans
Mycetocola	28	14	0	7	0	0	0	0	0	0	0	p__"Actinobacteria":c__Actinobacteria:o__Actinomycetales:f__Microbacteriaceae:g__Mycetocola
Mycobacterium	17	16	0	6	2	15	0	0	0	13	0	p__"Actinobacteria":c__Actinobacteria:o__Actinomycetales:f__Mycobacteriaceae:g__Mycobacterium
Mycoplana	10	5	0	0	0	0	0	0	0	0	0	p__"Proteobacteria":c__Alphaproteobacteria:o__Rhizobiales:f__Brucellaceae:g__Mycoplana
Mycoplasma	421	324	0	311	195	298	0	0	68	174	1	p__"Tenericutes":c__Mollicutes:o__Mycoplasmatales:f__Mycoplasmataceae:g__Mycoplasma
Myroides	26	26	0	20	20	22	0	0	6	25	0	p__"Bacteroidetes":c__Flavobacteriia:o__"Flavobacteriales":f__Flavobacteriaceae:g__Myroides
Myxococcus	202	167	0	50	107	169	0	76	0	193	0	p__"Proteobacteria":c__Deltaproteobacteria:o__Myxococcales:f__Myxococcaceae:g__Myxococcus
Nannocystis	10	10	0	10	9	10	0	9	10	9	10	p__"Proteobacteria":c__Deltaproteobacteria:o__Myxococcales:f__Nannocystaceae:g__Nannocystis
Natranaerobius	4	4	0	4	0	4	0	4	0	4	0	p__Firmicutes:c__Erysipelotrichia:o__Natranaerobiales:f__Natranaerobiaceae:g__Natranaerobius
Natribacillus	1	1	0	1	1	1	0	0	1	1	0	p__Nitrospinae:c__Thermoflexia:o__Candidatus Brocadiales:f__Candidatus Brocadiaceae:g__Natribacillus
Natroniella	4	4	0	3	4	4	0	3	0	4	0	p__Firmicutes:c__Clostridia:o__Halanaerobiales:f__Halobacteroidaceae:g__Natroniella
Natronincola	3	3	1	3	0	3	0	3	0	3	0	p__Firmicutes:c__Clostridia:o__Clostridiales:f__Clostridiaceae 2:g__Natronincola
Natronobacillus	3	3	0	3	3	0	0	3	0	0	0	p__Firmicutes:c__Erysipelotrichia:o__Erysipelotrichales:f__Bacillales_incertae_sedis:g__Natronobacillus
Natronocella	1	1	0	0	1	1	0	0	0	0	0	p__"Proteobacteria":c__Gammaproteobacteria:o__Chromatiales:f__Ectothiorhodospiraceae:g__Natronocella
Nautella	5	5	0	0	0	0	0	0	0	0	0	p__"Proteobacteria":c__Alphaproteobacteria:o__Rhodobacterales:f__Rhodobacteraceae:g__Nautella
Nautilia	6	6	0	6	0	6	0	5	6	6	0	p__"Proteobacteria":c__Epsilonproteobacteria:o__Nautiliales:f__Nautiliaceae:g__Nautilia
Naxibacter	5	2	0	3	1	3	0	2	1	1	0	p__"Proteobacteria":c__Betaproteobacteria:o__Burkholderiales:f__Oxalobacteraceae:g__Naxibacter
Negativicoccus	1	1	0	1	1	1	0	0	1	1	0	p__Firmicutes:c__Erysipelotrichia:o__Natranaerobiales:f__Natranaerobiaceae:g__Negativicoccus
Neisseria	1035	1033	0	46	978	1022	0	912	35	916	0	p__"Proteobacteria":c__Betaproteobacteria:o__Neisseriales:f__Neisseriaceae:g__Neisseria
Neoasaia	2	2	0	0	0	0	0	0	0	2	0	p__"Proteobacteria":c__Alphaproteobacteria:o__Rhodospirillales:f__Acetobacteraceae:g__Neoasaia
Neorickettsia	14	14	0	0	0	13	0	12	12	12	0	p__"Proteobacteria":c__Alphaproteobacteria:o__Rickettsiales:f__Anaplasmataceae:g__Neorickettsia
Neptuniibacter	2	2	0	1	1	1	0	0	0	0	0	p__"Proteobacteria":c__Gammaproteobacteria:o__Oceanospirillales:f__Oceanospirillaceae:g__Neptuniibacter
Neptunomonas	15	15	0	8	2	12	0	0	0	11	0	p__"Proteobacteria":c__Gammaproteobacteria:o__Oceanospirillales:f__Oceanospirillaceae:g__Neptunomonas
Nereida	3	3	0	0	0	0	0	1	0	0	0	p__"Proteobacteria":c__Alphaproteobacteria:o__Rhodobacterales:f__Rhodobacteraceae:g__Nereida
Nesiotobacter	2	2	0	0	0	2	0	2	0	0	0	p__"Proteobacteria":c__Alphaproteobacteria:o__Rhodobacterales:f__Rhodobacteraceae:g__Nesiotobacter
Nesterenkonia	43	43	0	28	0	14	0	23	0	17	0	p__"Actinobacteria":c__Actinobacteria:o__Actinomycetales:f__Micrococcaceae:g__Nesterenkonia
Nevskia	6	6	0	4	4	4	0	3	0	0	0	p__"Proteobacteria":c__Gammaproteobacteria:o__Xanthomonadales:f__Sinobacteraceae:g__Nevskia
Niabella	13	13	0	10	8	8	0	11	1	10	0	p__"Bacteroidetes":c__Sphingobacteriia:o__"Sphingobacteriales":f__Chitinophagaceae:g__Niabella
Nicoletella	47	47	0	47	44	47	0	46	0	39	0	p__"Proteobacteria":c__Gammaproteobacteria:o__Pasteurellales:f__Pasteurellaceae:g__Nicoletella
Nitratifractor	3	3	0	3	0	3	0	3	3	3	0	p__"Proteobacteria":c__Epsilonproteobacteria:o__Nautiliales:f__Nautiliaceae:g__Nitratifractor
Nitratireductor	17	12	0	0	0	9	0	6	0	0	0	p__"Proteobacteria":c__Alphaproteobacteria:o__Rhizobiales:f__Phyllobacteriaceae:g__Nitratireductor
Nitratiruptor	3	3	0	0	0	0	0	0	0	0	0	p__"Proteobacteria":c__Epsilonproteobacteria:o__Nautiliales:f__Nautiliaceae:g__Nitratiruptor
Nitrincola	1	1	0	0	0	0	0	0	1	1	0	p__"Proteobacteria":c__Gammaproteobacteria:o__Oceanospirillales:f__Oceanospirillaceae:g__Nitrincola
Nitritalea	1	1	0	1	1	1	0	0	0	1	0	p__"Bacteroidetes":c__Sphingobacteriia:o__"Sphingobacteriales":f__Cyclobacteriaceae:g__Nitritalea
Nitrobacter	66	66	0	0	0	0	0	60	0	58	0	p__"Proteobacteria":c__Alphaproteobacteria:o__Rhizobiales:f__Bradyrhizobiaceae:g__Nitrobacter
Nitrococcus	2	2	0	2	2	2	0	2	2	1	0	p__"Proteobacteria":c__Gammaproteobacteria:o__Chromatiales:f__Ectothiorhodospiraceae:g__Nitrococcus
Nitrosococcus	13	11	0	4	5	7	0	6	4	9	0	p__"Proteobacteria":c__Gammaproteobacteria:o__Chromatiales:f__Chromatiaceae:g__Nitrosococcus
Nitrosomonas	59	34	0	20	15	17	0	18	20	10	0	p__"Proteobacteria":c__Betaproteobacteria:o__Nitrosomonadales:f__Nitrosomonadaceae:g__Nitrosomonas
Nitrosospira	37	37	0	10	24	8	0	7	0	0	0	p__"Proteobacteria":c__Betaproteobacteria:o__Nitrosomonadales:f__Nitrosomonadaceae:g__Nitrosospira
Nitrospina	4	4	0	0	0	4	0	1	3	3	0	p__Nitrospinae:c__Fimbriimonadia:o__Magnetococcales:f__SAR11:g__Nitrospina
Nitrospira	1	1	0	0	0	0	0	0	0	0	0	p__Nitrospirae:c__"Nitrospira":o__"Nitrospirales":f__"Nitrospiraceae":g__Nitrospira
Nocardia	14	10	0	10	0	9	0	0	4	0	0	p__"Actinobacteria":c__Actinobacteria:o__Actinomycetales:f__Nocardiaceae:g__Nocardia
Nocardioides	198	182	0	80	1	153	0	0	0	0	0	p__"Actinobacteria":c__Actinobacteria:o__Actinomycetales:f__Nocardioidaceae:g__Nocardioides
Nocardiopsis	27	23	0	13	19	18	0	22	0	0	0	p__"Actinobacteria":c__Actinobacteria:o__Actinomycetales:f__Nocardiopsaceae:g__Nocardiopsis
Nonomuraea	86	86	0	48	0	76	0	0	33	0	0	p__"Actinobacteria":c__Actinobacteria:o__Actinomycetales:f__Streptosporangiaceae:g__Nonomuraea
Nosocomiicoccus	2	2	0	1	2	1	0	2	0	1	0	p__Firmicutes:c__Erysipelotrichia:o__Erysipelotrichales:f__Bacillales_incertae_sedis:g__Nosocomiicoccus
Noviherbaspirillum	3	3	0	1	3	0	0	2	0	0	0	p__Nitrospinae:c__Fimbriimonadia:o__Magnetococcales:f__SAR11:g__Noviherbaspirillum
Novispirillum	7	7	0	0	0	6	0	5	0	6	0	p__"Proteobacteria":c__Alphaproteobacteria:o__Rhodospirillales:f__Rhodospirillaceae:g__Novispirillum
Novosphingobium	117	115	0	0	0	96	0	25	1	10	0	p__"Proteobacteria":c__Alphaproteobacteria:o__Sphingomonadales:f__Sphingomonadaceae:g__Novosphingobium
Oceanibaculum	2	2	0	0	0	2	0	2	2	1	0	p__"Proteobacteria":c__Alphaproteobacteria:o__Rhodospirillales:f__Rhodospirillaceae:g__Oceanibaculum
Oceanicaulis	7	6	0	0	0	6	0	5	6	0	0	p__"Proteobacteria":c__Alphaproteobacteria:o__Caulobacterales:f__Hyphomonadaceae:g__Oceanicaulis
Oceanicola	22	22	0	0	0	0	0	10	0	0	0	p__"Proteobacteria":c__Alphaproteobacteria:o__Rhodobacterales:f__Rhodobacteraceae:g__Oceanicola
Oceanimonas	31	20	0	21	13	21	0	0	1	11	0	p__"Proteobacteria":c__Gammaproteobacteria:o__Aeromonadales:f__Aeromonadaceae:g__Oceanimonas
Oceaniserpentilla	1	1	0	0	1	0	0	1	0	0	0	p__"Proteobacteria":c__Gammaproteobacteria:o__Oceanospirillales:f__Oceanospirillaceae:g__Oceaniserpentilla
Oceanisphaera	15	10	0	6	7	15	0	0	0	7	0	p__"Proteobacteria":c__Gammaproteobacteria:o__Aeromonadales:f__Aeromonadaceae:g__Oceanisphaera
Oceanithermus	3	3	0	3	3	3	0	3	3	3	0	p__"Deinococcus-Thermus":c__Deinococci:o__Thermales:f__Thermaceae:g__Oceanithermus
Oceanobacillus	136	115	0	85	58	64	0	0	0	64	0	p__Firmicutes:c__Bacilli:o__Bacillales:f__Bacillaceae 2:g__Oceanobacillus
Oceanobacter	2	2	0	0	2	0	0	0	0	2	0	p__"Proteobacteria":c__Gammaproteobacteria:o__Oceanospirillales:f__Oceanospirillaceae:g__Oceanobacter
Oceanospirillum	17	15	0	6	8	15	0	5	4	13	0	p__"Proteobacteria":c__Gammaproteobacteria:o__Oceanospirillales:f__Oceanospirillaceae:g__Oceanospirillum
Ochrobactrum	392	386	0	14	0	61	0	308	0	43	0	p__"Proteobacteria":c__Alphaproteobacteria:o__Rhizobiales:f__Brucellaceae:g__Ochrobactrum
Octadecabacter	31	20	0	0	0	19	0	18	0	0	0	p__"Proteobacteria":c__Alphaproteobacteria:o__Rhodobacterales:f__Rhodobacteraceae:g__Octadecabacter
Odoribacter	2	2	0	2	1	2	0	2	2	2	0	p__"Bacteroidetes":c__"Bacteroidia":o__"Bacteroidales":f__"Porphyromonadaceae":g__Odoribacter
Oenococcus	7	7	0	5	5	5	0	5	0	5	0	p__Firmicutes:c__Bacilli:o__Lactobacillales:f__Leuconostocaceae:g__Oenococcus
Oerskovia	13	12	0	12	0	0	0	0	1	0	0	p__"Actinobacteria":c__Actinobacteria:o__Actinomycetales:f__Cellulomonadaceae:g__Oerskovia
Okibacterium	7	3	0	1	0	0	0	0	0	0	0	p__"Actinobacteria":c__Actinobacteria:o__Actinomycetales:f__Microbacteriaceae:g__Okibacterium
Oleibacter	4	4	0	4	4	0	0	0	0	4	0	p__"Proteobacteria":c__Gammaproteobacteria:o__Oceanospirillales:f__Oceanospirillaceae:g__Oleibacter
Oleiphilus	1	1	0	1	1	0	0	1	0	1	0	p__"Proteobacteria":c__Gammaproteobacteria:o__Oceanospirillales:f__Oleiphilaceae:g__Oleiphilus
Oleispira	8	8	0	7	6	7	0	6	0	0	0	p__"Proteobacteria":c__Gammaproteobacteria:o__Oceanospirillales:f__Oceanospirillaceae:g__Oleispira
Oligella	9	9	0	8	9	9	0	8	0	7	0	p__"Proteobacteria":c__Betaproteobacteria:o__Burkholderiales:f__Alcaligenaceae:g__Oligella
Oligosphaera	1	1	0	1	0	1	0	1	1	1	0	p__Nitrospinae:c__Oligosphaeria:o__Oligosphaerales:f__Oligosphaeraceae:g__Oligosphaera
Oligotropha	7	3	0	0	0	0	0	0	0	6	0	p__"Proteobacteria":c__Alphaproteobacteria:o__Rhizobiales:f__Bradyrhizobiaceae:g__Oligotropha
Olleya	12	3	0	2	0	0	0	0	0	0	0	p__"Bacteroidetes":c__Flavobacteriia:o__"Flavobacteriales":f__Flavobacteriaceae:g__Olleya
Olsenella	16	16	0	12	0	13	0	0	14	15	0	p__"Actinobacteria":c__Actinobacteria:o__Coriobacteriales:f__Coriobacteriaceae:g__Olsenella
Opitutus	7	7	0	3	3	5	0	3	3	0	0	p__"Verrucomicrobia":c__Opitutae:o__Opitutales:f__Opitutaceae:g__Opitutus
Orbus	1	1	0	1	1	1	0	1	0	1	0	p__"Proteobacteria":c__Gammaproteobacteria:o__Gammaproteobacteria_incertae_sedis:f__NA:g__Orbus
Orenia	3	3	0	3	2	2	0	0	3	2	0	p__Firmicutes:c__Clostridia:o__Halanaerobiales:f__Halobacteroidaceae:g__Orenia
Oribacterium	7	7	0	2	0	1	0	1	3	3	0	p__Firmicutes:c__Clostridia:o__Clostridiales:f__Lachnospiraceae:g__Oribacterium
Orientia	14	14	0	5	0	13	0	14	14	10	0	p__"Proteobacteria":c__Alphaproteobacteria:o__Rickettsiales:f__Rickettsiaceae:g__Orientia
Ornithinibacillus	25	8	0	4	3	0	0	4	0	1	0	p__Firmicutes:c__Erysipelotrichia:o__Erysipelotrichales:f__Bacillales_incertae_sedis:g__Ornithinibacillus
Ornithinibacter	1	1	0	1	0	0	0	0	0	0	0	p__"Actinobacteria":c__Actinobacteria:o__Actinomycetales:f__Intrasporangiaceae:g__Ornithinibacter
Ornithinicoccus	8	2	0	2	0	2	0	0	0	0	0	p__"Actinobacteria":c__Actinobacteria:o__Actinomycetales:f__Intrasporangiaceae:g__Ornithinicoccus
Ornithinimicrobium	11	10	0	6	0	3	0	0	0	0	0	p__"Actinobacteria":c__Actinobacteria:o__Actinomycetales:f__Intrasporangiaceae:g__Ornithinimicrobium
Oryzihumus	10	3	0	3	0	3	0	0	0	0	0	p__"Actinobacteria":c__Actinobacteria:o__Actinomycetales:f__Intrasporangiaceae:g__Oryzihumus
Oscillibacter	4	4	0	4	0	4	0	0	0	4	0	p__Firmicutes:c__Erysipelotrichia:o__Erysipelotrichales:f__Bacillales_incertae_sedis:g__Oscillibacter
Oscillochloris	4	4	0	4	0	4	0	0	0	4	0	p__Nitrospinae:c__Endomicrobia:o__NA:f__NA:g__Oscillochloris
Otariodibacter	6	6	0	3	2	6	0	0	0	4	0	p__Nitrospinae:c__Fimbriimonadia:o__Fimbriimonadales:f__Mooreiaceae:g__Otariodibacter
Ottowia	5	3	0	1	1	0	0	0	0	0	0	p__"Proteobacteria":c__Betaproteobacteria:o__Burkholderiales:f__Comamonadaceae:g__Ottowia
Oxalicibacterium	8	7	0	0	4	3	0	6	0	0	0	p__"Proteobacteria":c__Betaproteobacteria:o__Burkholderiales:f__Oxalobacteraceae:g__Oxalicibacterium
Oxalobacter	13	11	0	2	5	1	0	2	0	6	0	p__"Proteobacteria":c__Betaproteobacteria:o__Burkholderiales:f__Oxalobacteraceae:g__Oxalobacter
Oxalophagus	3	3	0	2	0	2	0	2	0	1	0	p__Firmicutes:c__Bacilli:o__Bacillales:f__Paenibacillaceae 2:g__Oxalophagus
Oxobacter	4	4	0	4	0	1	0	1	0	4	0	p__Firmicutes:c__Clostridia:o__Clostridiales:f__Clostridiaceae 1:g__Oxobacter
Pacificibacter	2	1	0	0	0	1	0	1	0	0	0	p__"Proteobacteria":c__Alphaproteobacteria:o__Rhodobacterales:f__Rhodobacteraceae:g__Pacificibacter
Paenibacillus	1455	1437	0	791	1039	1141	0	1	0	410	6	p__Firmicutes:c__Bacilli:o__Bacillales:f__Paenibacillaceae 1:g__Paenibacillus
Paenisporosarcina	11	11	0	10	11	0	0	5	0	11	0	p__Firmicutes:c__Erysipelotrichia:o__Erysipelotrichales:f__Bacillales_incertae_sedis:g__Paenisporosarcina
Palleronia	2	1	0	0	0	1	0	1	0	0	0	p__"Proteobacteria":c__Alphaproteobacteria:o__Rhodobacterales:f__Rhodobacteraceae:g__Palleronia
Paludibacter	5	5	0	5	5	5	0	5	5	5	0	p__"Bacteroidetes":c__"Bacteroidia":o__"Bacteroidales":f__"Porphyromonadaceae":g__Paludibacter
Paludibacterium	1	1	0	1	1	0	0	1	0	0	0	p__"Proteobacteria":c__Betaproteobacteria:o__Neisseriales:f__Neisseriaceae:g__Paludibacterium
Panacagrimonas	1	1	0	1	1	1	0	1	0	0	0	p__"Proteobacteria":c__Gammaproteobacteria:o__Xanthomonadales:f__Sinobacteraceae:g__Panacagrimonas
Pandoraea	71	71	0	67	69	68	0	62	0	66	0	p__"Proteobacteria":c__Betaproteobacteria:o__Burkholderiales:f__Burkholderiaceae:g__Pandoraea
Pannonibacter	14	14	0	0	0	1	0	12	0	0	0	p__"Proteobacteria":c__Alphaproteobacteria:o__Rhodobacterales:f__Rhodobacteraceae:g__Pannonibacter
Pantoea	406	300	0	252	61	276	0	0	0	160	0	p__"Proteobacteria":c__Gammaproteobacteria:o__"Enterobacteriales":f__Enterobacteriaceae:g__Pantoea
Papillibacter	1	1	0	1	0	1	0	0	0	1	0	p__Firmicutes:c__Clostridia:o__Clostridiales:f__Ruminococcaceae:g__Papillibacter
Parabacteroides	2	2	0	2	2	2	0	2	2	2	0	p__"Bacteroidetes":c__"Bacteroidia":o__"Bacteroidales":f__"Porphyromonadaceae":g__Parabacteroides
Parachlamydia	3	3	0	3	3	3	0	3	1	3	0	p__"Chlamydiae":c__Chlamydiia:o__Chlamydiales:f__Parachlamydiaceae:g__Parachlamydia
Paracoccus	279	274	0	1	0	160	0	123	170	0	0	p__"Proteobacteria":c__Alphaproteobacteria:o__Rhodobacterales:f__Rhodobacteraceae:g__Paracoccus
Paracraurococcus	5	2	0	2	0	2	0	2	0	2	0	p__"Proteobacteria":c__Alphaproteobacteria:o__Rhodospirillales:f__Acetobacteraceae:g__Paracraurococcus
Paraeggerthella	4	4	0	1	0	4	0	0	4	3	0	p__"Actinobacteria":c__Actinobacteria:o__Coriobacteriales:f__Coriobacteriaceae:g__Paraeggerthella
Paraferrimonas	7	7	0	6	1	0	0	0	0	6	0	p__"Proteobacteria":c__Gammaproteobacteria:o__Alteromonadales:f__Ferrimonadaceae:g__Paraferrimonas
Paralactobacillus	1	1	0	1	0	1	0	1	0	1	0	p__Firmicutes:c__Bacilli:o__Lactobacillales:f__Lactobacillaceae:g__Paralactobacillus
Paraliobacillus	8	6	0	6	0	0	0	6	0	0	0	p__Firmicutes:c__Bacilli:o__Bacillales:f__Bacillaceae 2:g__Paraliobacillus
Paramoritella	3	3	0	3	1	3	0	1	0	3	0	p__"Proteobacteria":c__Gammaproteobacteria:o__Alteromonadales:f__Moritellaceae:g__Paramoritella
Paraoerskovia	2	2	0	1	0	0	0	2	0	0	0	p__"Actinobacteria":c__Actinobacteria:o__Actinomycetales:f__Cellulomonadaceae:g__Paraoerskovia
Paraperlucidibaca	2	2	0	2	1	2	0	0	0	2	0	p__Nitrospinae:c__Fimbriimonadia:o__Fimbriimonadales:f__Defluviitaleaceae:g__Paraperlucidibaca
Parapusillimonas	2	2	0	0	2	0	0	2	0	0	0	p__"Proteobacteria":c__Betaproteobacteria:o__Burkholderiales:f__Alcaligenaceae:g__Parapusillimonas
Parascardovia	4	4	0	4	0	4	0	4	4	4	0	p__"Actinobacteria":c__Actinobacteria:o__Bifidobacteriales:f__Bifidobacteriaceae:g__Parascardovia
Parasporobacterium	1	1	0	1	0	1	0	1	0	1	0	p__Firmicutes:c__Clostridia:o__Clostridiales:f__Lachnospiraceae:g__Parasporobacterium
Parasutterella	3	3	0	3	3	3	0	3	0	3	0	p__"Proteobacteria":c__Betaproteobacteria:o__Burkholderiales:f__Sutterellaceae:g__Parasutterella
Parvimonas	18	18	0	4	0	18	0	17	3	3	0	p__Firmicutes:c__Clostridia:o__Clostridiales:f__Clostridiales_Incertae Sedis XI:g__Parvimonas
Parvularcula	5	5	0	0	0	4	0	4	4	0	0	p__"Proteobacteria":c__Alphaproteobacteria:o__"Parvularculales":f__"Parvularculaceae":g__Parvularcula
Pasteurella	139	121	0	97	109	107	0	1	0	13	0	p__"Proteobacteria":c__Gammaproteobacteria:o__Pasteurellales:f__Pasteurellaceae:g__Pasteurella
Patulibacter	7	7	0	6	3	6	0	1	7	3	0	p__"Actinobacteria":c__Actinobacteria:o__Solirubrobacterales:f__Patulibacteraceae:g__Patulibacter
Paucibacter	15	12	0	0	8	0	0	11	0	0	0	p__"Proteobacteria":c__Betaproteobacteria:o__Burkholderiales:f__Burkholderiales_incertae_sedis:g__Paucibacter
Paucimonas	3	3	0	2	3	3	0	0	0	0	0	p__"Proteobacteria":c__Betaproteobacteria:o__Burkholderiales:f__Burkholderiaceae:g__Paucimonas
Pectinatus	8	8	0	3	8	4	0	3	3	8	1	p__Firmicutes:c__Clostridia:o__Clostridiales:f__Veillonellaceae:g__Pectinatus
Pectobacterium	114	89	0	5	35	4	0	13	0	0	0	p__"Proteobacteria":c__Gammaproteobacteria:o__"Enterobacteriales":f__Enterobacteriaceae:g__Pectobacterium
Pediococcus	192	192	184	191	187	192	0	177	0	76	0	p__Firmicutes:c__Bacilli:o__Lactobacillales:f__Lactobacillaceae:g__Pediococcus
Pedobacter	2	1	0	0	0	0	0	0	0	0	0	p__"Bacteroidetes":c__Sphingobacteriia:o__"Sphingobacteriales":f__Sphingobacteriaceae:g__Pedobacter
Pedomicrobium	12	12	0	0	0	10	0	10	7	12	0	p__"Proteobacteria":c__Alphaproteobacteria:o__Rhizobiales:f__Hyphomicrobiaceae:g__Pedomicrobium
Pelagibaca	11	7	0	0	0	0	0	0	0	0	0	p__"Proteobacteria":c__Alphaproteobacteria:o__Rhodobacterales:f__Rhodobacteraceae:g__Pelagibaca
Pelagibacterium	6	6	0	0	0	5	0	3	0	3	0	p__Nitrospinae:c__Fimbriimonadia:o__Fimbriimonadales:f__Defluviitaleaceae:g__Pelagibacterium
Pelagibius	2	2	0	0	0	2	0	1	0	1	0	p__"Proteobacteria":c__Alphaproteobacteria:o__Rhodospirillales:f__Rhodospirillaceae:g__Pelagibius
Pelagicoccus	4	4	0	4	4	4	0	4	4	4	0	p__"Verrucomicrobia":c__Opitutae:o__Puniceicoccales:f__Puniceicoccaceae:g__Pelagicoccus
Pelagicola	3	0	0	0	0	0	0	0	0	0	0	p__"Proteobacteria":c__Alphaproteobacteria:o__Rhodobacterales:f__Rhodobacteraceae:g__Pelagicola
Pelistega	5	3	0	2	2	3	0	3	0	3	0	p__"Proteobacteria":c__Betaproteobacteria:o__Burkholderiales:f__Alcaligenaceae:g__Pelistega
Pelobacter	12	11	0	11	8	3	0	3	1	0	0	p__"Proteobacteria":c__Deltaproteobacteria:o__Desulfuromonadales:f__Desulfuromonadaceae:g__Pelobacter
Pelomonas	14	13	0	0	8	5	0	4	0	0	0	p__"Proteobacteria":c__Betaproteobacteria:o__Burkholderiales:f__Comamonadaceae:g__Pelomonas
Pelosinus	47	47	19	40	31	35	0	33	36	47	1	p__Firmicutes:c__Erysipelotrichia:o__Natranaerobiales:f__Natranaerobiaceae:g__Pelosinus
Pelospora	1	1	0	1	1	1	0	1	1	1	0	p__Firmicutes:c__Clostridia:o__Clostridiales:f__Syntrophomonadaceae:g__Pelospora
Pelotomaculum	7	7	3	5	0	7	0	6	4	0	0	p__Firmicutes:c__Clostridia:o__Clostridiales:f__Peptococcaceae 2:g__Pelotomaculum
Peptococcus	6	6	0	1	1	1	0	1	1	1	0	p__Firmicutes:c__Clostridia:o__Clostridiales:f__Peptococcaceae 1:g__Peptococcus
Peptoniphilus	26	26	0	13	0	16	0	9	17	10	0	p__Firmicutes:c__Clostridia:o__Clostridiales:f__Peptoniphilaceae:g__Peptoniphilus
Peptostreptococcus	25	20	3	17	0	20	0	2	16	12	0	p__Firmicutes:c__Clostridia:o__Clostridiales:f__Peptostreptococcaceae:g__Peptostreptococcus
Peredibacter	1	1	0	1	1	1	0	1	1	1	0	p__"Proteobacteria":c__Deltaproteobacteria:o__Bdellovibrionales:f__Bacteriovoracaceae:g__Peredibacter
Perlucidibaca	4	3	0	2	2	2	0	0	0	3	0	p__"Proteobacteria":c__Gammaproteobacteria:o__Pseudomonadales:f__Moraxellaceae:g__Perlucidibaca
Persicirhabdus	2	2	0	1	2	2	0	2	2	2	0	p__"Verrucomicrobia":c__Verrucomicrobiae:o__Verrucomicrobiales:f__Verrucomicrobiaceae:g__Persicirhabdus
Persicivirga	4	4	0	1	1	3	0	0	2	1	0	p__"Bacteroidetes":c__Flavobacteriia:o__"Flavobacteriales":f__Flavobacteriaceae:g__Persicivirga
Petrimonas	1	1	0	0	0	0	0	0	0	0	0	p__"Bacteroidetes":c__"Bacteroidia":o__"Bacteroidales":f__"Porphyromonadaceae":g__Petrimonas
Petrobacter	2	1	0	0	1	0	0	0	0	0	0	p__"Proteobacteria":c__Betaproteobacteria:o__Hydrogenophilales:f__Hydrogenophilaceae:g__Petrobacter
Petrotoga	10	10	0	9	9	9	0	9	9	9	0	p__"Thermotogae":c__Thermotogae:o__Petrotogales:f__Petrotogaceae:g__Petrotoga
Phaeobacter	37	30	0	0	0	0	0	2	0	0	0	p__"Proteobacteria":c__Alphaproteobacteria:o__Rhodobacterales:f__Rhodobacteraceae:g__Phaeobacter
Phaeospirillum	10	8	0	0	0	8	0	6	0	6	0	p__"Proteobacteria":c__Alphaproteobacteria:o__Rhodospirillales:f__Rhodospirillaceae:g__Phaeospirillum
Phaeovibrio	1	1	0	0	0	1	0	1	0	1	0	p__"Proteobacteria":c__Alphaproteobacteria:o__Rhodospirillales:f__Rhodospirillaceae:g__Phaeovibrio
Phascolarctobacterium	7	7	0	2	2	2	0	2	2	4	0	p__Firmicutes:c__Clostridia:o__Clostridiales:f__Veillonellaceae:g__Phascolarctobacterium
Phaselicystis	2	2	0	2	2	2	0	2	2	2	0	p__"Proteobacteria":c__Deltaproteobacteria:o__Myxococcales:f__Phaselicystidaceae:g__Phaselicystis
Phaseolibacter	2	2	0	0	2	0	0	1	0	0	0	p__Nitrospinae:c__Fimbriimonadia:o__Fimbriimonadales:f__Fimbriimonadaceae:g__Phaseolibacter
Phenylobacterium	17	16	0	0	0	6	0	9	13	11	0	p__"Proteobacteria":c__Alphaproteobacteria:o__Caulobacterales:f__Caulobacteraceae:g__Phenylobacterium
Phocoenobacter	1	1	0	1	1	1	0	1	0	1	0	p__"Proteobacteria":c__Gammaproteobacteria:o__Pasteurellales:f__Pasteurellaceae:g__Phocoenobacter
Photobacterium	284	283	0	234	97	254	0	0	101	86	0	p__"Proteobacteria":c__Gammaproteobacteria:o__"Vibrionales":f__Vibrionaceae:g__Photobacterium
Photorhabdus	154	153	0	144	127	97	0	101	0	152	0	p__"Proteobacteria":c__Gammaproteobacteria:o__"Enterobacteriales":f__Enterobacteriaceae:g__Photorhabdus
Phycicoccus	15	15	0	8	0	9	0	14	0	0	0	p__"Actinobacteria":c__Actinobacteria:o__Actinomycetales:f__Intrasporangiaceae:g__Phycicoccus
Phyllobacterium	74	73	0	0	0	49	0	59	0	0	0	p__"Proteobacteria":c__Alphaproteobacteria:o__Rhizobiales:f__Phyllobacteriaceae:g__Phyllobacterium
Phytomonospora	2	2	0	1	0	2	0	0	0	0	0	p__Nitrospinae:c__Thermoflexia:o__Candidatus Brocadiales:f__Candidatus Brocadiaceae:g__Phytomonospora
Pigmentiphaga	13	13	0	0	6	11	0	0	0	0	0	p__"Proteobacteria":c__Betaproteobacteria:o__Burkholderiales:f__Alcaligenaceae:g__Pigmentiphaga
Pimelobacter	1	1	0	1	0	1	0	0	0	0	0	p__"Actinobacteria":c__Actinobacteria:o__Actinomycetales:f__Nocardioidaceae:g__Pimelobacter
Pirellula	23	5	0	0	5	5	0	4	5	4	0	p__Nitrospinae:c__Fimbriimonadia:o__Magnetococcales:f__SAR11:g__Pirellula
Piscibacillus	4	4	0	2	4	0	0	4	0	2	0	p__Firmicutes:c__Erysipelotrichia:o__Erysipelotrichales:f__Bacillales_incertae_sedis:g__Piscibacillus
Piscicoccus	1	1	0	1	0	0	0	0	0	1	0	p__"Actinobacteria":c__Actinobacteria:o__Actinomycetales:f__Dermatophilaceae:g__Piscicoccus
Piscinibacter	4	2	0	0	2	0	0	0	0	1	0	p__"Proteobacteria":c__Betaproteobacteria:o__Burkholderiales:f__Burkholderiales_incertae_sedis:g__Piscinibacter
Piscirickettsia	29	29	0	29	29	29	0	4	0	29	0	p__"Proteobacteria":c__Gammaproteobacteria:o__Thiotrichales:f__Piscirickettsiaceae:g__Piscirickettsia
Planctomyces	20	18	0	4	4	10	0	11	8	10	0	p__"Planctomycetes":c__Planctomycetia:o__Planctomycetales:f__Planctomycetaceae:g__Planctomyces
Planifilum	8	8	0	5	5	5	0	7	4	0	1	p__Firmicutes:c__Bacilli:o__Bacillales:f__Thermoactinomycetaceae 2:g__Planifilum
Planococcus	123	99	0	95	80	1	0	0	0	17	0	p__Firmicutes:c__Bacilli:o__Bacillales:f__Planococcaceae:g__Planococcus
Planomicrobium	47	46	0	35	8	0	0	28	0	4	0	p__Firmicutes:c__Bacilli:o__Bacillales:f__Planococcaceae:g__Planomicrobium
Planomonospora	1	1	0	1	0	0	0	0	0	0	0	p__"Actinobacteria":c__Actinobacteria:o__Actinomycetales:f__Streptosporangiaceae:g__Planomonospora
Planotetraspora	26	22	0	11	0	24	0	0	0	11	0	p__"Actinobacteria":c__Actinobacteria:o__Actinomycetales:f__Streptosporangiaceae:g__Planotetraspora
Plantibacter	13	13	0	13	0	0	0	0	0	0	0	p__"Actinobacteria":c__Actinobacteria:o__Actinomycetales:f__Microbacteriaceae:g__Plantibacter
Pleomorphomonas	11	11	0	0	0	9	0	11	6	11	0	p__"Proteobacteria":c__Alphaproteobacteria:o__Rhizobiales:f__Methylocystaceae:g__Pleomorphomonas
Plesiocystis	1	1	0	1	1	1	0	1	0	1	0	p__"Proteobacteria":c__Deltaproteobacteria:o__Myxococcales:f__Nannocystaceae:g__Plesiocystis
Plesiomonas	10	10	0	1	6	0	0	0	0	10	0	p__"Proteobacteria":c__Gammaproteobacteria:o__"Enterobacteriales":f__Enterobacteriaceae:g__Plesiomonas
Pluralibacter	6	2	0	0	0	0	0	0	1	0	0	p__Nitrospinae:c__Fimbriimonadia:o__Magnetococcales:f__SAR11:g__Pluralibacter
Polaribacter	61	56	0	20	31	28	0	0	16	55	0	p__"Bacteroidetes":c__Flavobacteriia:o__"Flavobacteriales":f__Flavobacteriaceae:g__Polaribacter
Polaromonas	47	47	0	14	7	24	0	17	0	16	0	p__"Proteobacteria":c__Betaproteobacteria:o__Burkholderiales:f__Comamonadaceae:g__Polaromonas
Polycladomyces	1	1	0	1	1	0	0	0	0	0	0	p__Nitrospinae:c__Fimbriimonadia:o__Magnetococcales:f__SAR11:g__Polycladomyces
Polynucleobacter	175	175	0	149	145	131	0	126	154	113	0	p__"Proteobacteria":c__Betaproteobacteria:o__Burkholderiales:f__Burkholderiaceae:g__Polynucleobacter
Pontibaca	1	1	0	0	0	1	0	0	0	0	0	p__"Proteobacteria":c__Alphaproteobacteria:o__Rhodobacterales:f__Rhodobacteraceae:g__Pontibaca
Pontibacillus	18	18	0	9	13	0	0	11	0	17	0	p__Firmicutes:c__Bacilli:o__Bacillales:f__Bacillaceae 2:g__Pontibacillus
Pontibacter	21	21	0	10	12	19	0	0	13	14	0	p__"Bacteroidetes":c__Sphingobacteriia:o__"Sphingobacteriales":f__Cytophagaceae:g__Pontibacter
Ponticoccus	5	1	0	0	0	0	0	0	0	0	0	p__"Proteobacteria":c__Alphaproteobacteria:o__Rhodobacterales:f__Rhodobacteraceae:g__Ponticoccus
Porphyrobacter	34	31	0	0	0	30	0	30	0	28	0	p__"Proteobacteria":c__Alphaproteobacteria:o__Sphingomonadales:f__Erythrobacteraceae:g__Porphyrobacter
Porphyromonas	10	10	0	9	8	10	0	5	1	6	0	p__"Bacteroidetes":c__"Bacteroidia":o__"Bacteroidales":f__"Porphyromonadaceae":g__Porphyromonas
Poseidonocella	2	1	0	0	0	0	0	1	0	0	0	p__Nitrospinae:c__Fimbriimonadia:o__Fimbriimonadales:f__Fimbriimonadaceae:g__Poseidonocella
Pragia	1	1	0	0	1	0	0	0	0	1	0	p__"Proteobacteria":c__Gammaproteobacteria:o__"Enterobacteriales":f__Enterobacteriaceae:g__Pragia
Prevotella	2	2	0	0	1	2	0	1	0	1	0	p__"Bacteroidetes":c__"Bacteroidia":o__"Bacteroidales":f__"Prevotellaceae":g__Prevotella
Pricia	1	1	0	1	1	1	0	0	0	1	0	p__Nitrospinae:c__Fimbriimonadia:o__Fimbriimonadales:f__Mooreiaceae:g__Pricia
Primorskyibacter	3	3	0	0	0	2	0	0	0	0	0	p__"Proteobacteria":c__Alphaproteobacteria:o__Rhodobacterales:f__Rhodobacteraceae:g__Primorskyibacter
Promicromonospora	41	39	0	21	0	39	0	35	19	0	0	p__"Actinobacteria":c__Actinobacteria:o__Actinomycetales:f__Promicromonosporaceae:g__Promicromonospora
Propionibacterium	149	137	0	127	8	133	0	91	128	121	0	p__"Actinobacteria":c__Actinobacteria:o__Actinomycetales:f__Propionibacteriaceae:g__Propionibacterium
Propionicicella	1	1	0	1	0	1	0	0	0	1	0	p__"Actinobacteria":c__Actinobacteria:o__Actinomycetales:f__Propionibacteriaceae:g__Propionicicella
Propionicimonas	1	1	0	1	0	1	0	0	0	0	0	p__"Actinobacteria":c__Actinobacteria:o__Actinomycetales:f__Propionibacteriaceae:g__Propionicimonas
Propioniferax	2	1	0	1	0	1	0	0	0	1	0	p__"Actinobacteria":c__Actinobacteria:o__Actinomycetales:f__Propionibacteriaceae:g__Propioniferax
Propionigenium	4	4	0	4	0	1	0	3	0	3	0	p__"Fusobacteria":c__Fusobacteriia:o__"Fusobacteriales":f__"Fusobacteriaceae":g__Propionigenium
Propionimicrobium	2	2	0	2	0	2	0	0	2	2	0	p__"Actinobacteria":c__Actinobacteria:o__Actinomycetales:f__Propionibacteriaceae:g__Propionimicrobium
Propionispira	1	1	0	1	0	0	0	1	0	1	0	p__Firmicutes:c__Clostridia:o__Clostridiales:f__Veillonellaceae:g__Propionispira
Propionispora	3	3	0	3	3	3	0	3	3	3	0	p__Firmicutes:c__Clostridia:o__Clostridiales:f__Veillonellaceae:g__Propionispora
Propionivibrio	7	5	0	4	3	2	0	3	1	0	0	p__"Proteobacteria":c__Betaproteobacteria:o__Rhodocyclales:f__Rhodocyclaceae:g__Propionivibrio
Prosthecobacter	6	6	0	5	6	6	0	6	4	6	0	p__"Verrucomicrobia":c__Verrucomicrobiae:o__Verrucomicrobiales:f__Verrucomicrobiaceae:g__Prosthecobacter
Prosthecochloris	8	7	0	7	7	7	0	0	5	2	0	p__"Chlorobi":c__"Chlorobia":o__Chlorobiales:f__Chlorobiaceae:g__Prosthecochloris
Prosthecomicrobium	8	6	0	0	0	3	0	6	0	0	0	p__"Proteobacteria":c__Alphaproteobacteria:o__Rhizobiales:f__Hyphomicrobiaceae:g__Prosthecomicrobium
Proteiniborus	1	1	0	1	0	1	0	1	1	1	0	p__Firmicutes:c__Thermolithobacteria:o__Thermolithobacterales:f__Clostridiales_incertae_sedis:g__Proteiniborus
Proteiniclasticum	2	2	0	2	0	2	0	0	2	2	0	p__Firmicutes:c__Erysipelotrichia:o__Erysipelotrichales:f__Bacillales_incertae_sedis:g__Proteiniclasticum
Proteiniphilum	1	0	0	0	0	0	0	0	0	0	0	p__"Bacteroidetes":c__"Bacteroidia":o__"Bacteroidales":f__"Porphyromonadaceae":g__Proteiniphilum
Proteocatella	1	1	0	1	0	1	0	1	1	1	0	p__Firmicutes:c__Erysipelotrichia:o__Erysipelotrichales:f__Bacillales_incertae_sedis:g__Proteocatella
Proteus	111	109	0	109	59	108	0	82	0	0	0	p__"Proteobacteria":c__Gammaproteobacteria:o__"Enterobacteriales":f__Enterobacteriaceae:g__Proteus
Providencia	86	86	0	85	81	86	0	35	0	3	0	p__"Proteobacteria":c__Gammaproteobacteria:o__"Enterobacteriales":f__Enterobacteriaceae:g__Providencia
Pseudaminobacter	5	4	0	0	0	4	0	0	0	0	0	p__"Proteobacteria":c__Alphaproteobacteria:o__Rhizobiales:f__Phyllobacteriaceae:g__Pseudaminobacter
Pseudenhygromyxa	1	1	0	1	1	1	0	1	1	1	0	p__Nitrospinae:c__Fimbriimonadia:o__Fimbriimonadales:f__Mooreiaceae:g__Pseudenhygromyxa
Pseudoalteromonas	1155	1136	0	923	801	1062	0	762	917	1020	0	p__"Proteobacteria":c__Gammaproteobacteria:o__Alteromonadales:f__Pseudoalteromonadaceae:g__Pseudoalteromonas
Pseudobutyrivibrio	20	20	0	7	0	20	0	16	8	15	0	p__Firmicutes:c__Clostridia:o__Clostridiales:f__Lachnospiraceae:g__Pseudobutyrivibrio
Pseudochrobactrum	13	13	0	0	0	12	0	11	9	0	0	p__"Proteobacteria":c__Alphaproteobacteria:o__Rhizobiales:f__Brucellaceae:g__Pseudochrobactrum
Pseudoclavibacter	12	8	0	7	0	0	0	0	0	0	0	p__"Actinobacteria":c__Actinobacteria:o__Actinomycetales:f__Microbacteriaceae:g__Pseudoclavibacter
Pseudoflavonifractor	1	1	0	1	0	1	0	1	0	1	0	p__Firmicutes:c__Erysipelotrichia:o__Erysipelotrichales:f__Bacillales_incertae_sedis:g__Pseudoflavonifractor
Pseudogulbenkiania	10	10	0	8	9	0	0	10	0	0	0	p__"Proteobacteria":c__Betaproteobacteria:o__Neisseriales:f__Neisseriaceae:g__Pseudogulbenkiania
Pseudolabrys	1	1	0	0	0	0	0	0	0	0	0	p__"Proteobacteria":c__Alphaproteobacteria:o__Rhizobiales:f__Xanthobacteraceae:g__Pseudolabrys
Pseudomonas	5280	5165	0	3626	4433	4077	0	2141	3778	1208	0	p__"Proteobacteria":c__Gammaproteobacteria:o__Pseudomonadales:f__Pseudomonadaceae:g__Pseudomonas
Pseudonocardia	8	7	0	0	0	6	0	0	0	1	0	p__"Actinobacteria":c__Actinobacteria:o__Actinomycetales:f__Pseudonocardiaceae:g__Pseudonocardia
Pseudorhodobacter	8	6	0	2	0	1	0	2	1	0	0	p__"Proteobacteria":c__Alphaproteobacteria:o__Rhodobacterales:f__Rhodobacteraceae:g__Pseudorhodobacter
Pseudorhodoferax	3	3	0	0	3	3	0	1	0	0	0	p__"Proteobacteria":c__Betaproteobacteria:o__Burkholderiales:f__Comamonadaceae:g__Pseudorhodoferax
Pseudoruegeria	17	5	0	0	0	0	0	1	0	0	0	p__"Proteobacteria":c__Alphaproteobacteria:o__Rhodobacterales:f__Rhodobacteraceae:g__Pseudoruegeria
Pseudospirillum	3	3	0	3	3	3	0	0	1	3	0	p__"Proteobacteria":c__Gammaproteobacteria:o__Oceanospirillales:f__Oceanospirillaceae:g__Pseudospirillum
Pseudovibrio	38	37	0	0	0	10	0	35	0	10	0	p__"Proteobacteria":c__Alphaproteobacteria:o__Rhodobacterales:f__Rhodobacteraceae:g__Pseudovibrio
Pseudoxanthobacter	2	2	0	0	0	0	0	2	0	2	0	p__"Proteobacteria":c__Alphaproteobacteria:o__Rhizobiales:f__Xanthobacteraceae:g__Pseudoxanthobacter
Pseudoxanthomonas	82	81	0	64	43	46	0	0	0	21	0	p__"Proteobacteria":c__Gammaproteobacteria:o__Xanthomonadales:f__Xanthomonadaceae:g__Pseudoxanthomonas
Psychrilyobacter	2	2	0	2	0	2	0	2	0	1	0	p__"Fusobacteria":c__Fusobacteriia:o__"Fusobacteriales":f__"Fusobacteriaceae":g__Psychrilyobacter
Psychrobacillus	16	1	0	1	1	0	0	1	0	3	0	p__Firmicutes:c__Erysipelotrichia:o__Erysipelotrichales:f__Bacillales_incertae_sedis:g__Psychrobacillus
Psychrobacter	440	436	0	409	399	408	0	362	365	412	0	p__"Proteobacteria":c__Gammaproteobacteria:o__Pseudomonadales:f__Moraxellaceae:g__Psychrobacter
Psychroflexus	13	13	0	12	8	11	0	0	12	1	0	p__"Bacteroidetes":c__Flavobacteriia:o__"Flavobacteriales":f__Flavobacteriaceae:g__Psychroflexus
Psychromonas	48	47	0	28	7	42	0	31	0	47	0	p__"Proteobacteria":c__Gammaproteobacteria:o__Alteromonadales:f__Psychromonadaceae:g__Psychromonas
Psychroserpens	21	10	0	5	0	2	0	0	0	1	0	p__"Bacteroidetes":c__Flavobacteriia:o__"Flavobacteriales":f__Flavobacteriaceae:g__Psychroserpens
"Psychrosinus"	1	1	0	1	1	1	0	1	0	1	0	p__Cyanobacteria/Chloroplast:c__Negativicutes:o__Selenomonadales:f__Acidaminococcaceae:g__"Psychrosinus"
Psychrosphaera	5	5	0	3	1	3	0	0	0	5	0	p__"Proteobacteria":c__Gammaproteobacteria:o__Alteromonadales:f__Pseudoalteromonadaceae:g__Psychrosphaera
Pullulanibacillus	8	7	0	4	2	0	0	0	0	0	0	p__Firmicutes:c__Erysipelotrichia:o__Erysipelotrichales:f__Bacillales_incertae_sedis:g__Pullulanibacillus
Puniceicoccus	1	1	0	1	1	1	0	1	1	1	0	p__"Verrucomicrobia":c__Opitutae:o__Puniceicoccales:f__Puniceicoccaceae:g__Puniceicoccus
Pusillimonas	15	12	0	1	2	2	0	2	0	0	0	p__"Proteobacteria":c__Betaproteobacteria:o__Burkholderiales:f__Alcaligenaceae:g__Pusillimonas
Pyramidobacter	5	5	0	5	0	5	0	5	5	4	0	p__"Synergistetes":c__Synergistia:o__Synergistales:f__Synergistaceae:g__Pyramidobacter
Quatrionicoccus	1	1	0	1	1	0	0	1	0	1	0	p__"Proteobacteria":c__Betaproteobacteria:o__Rhodocyclales:f__Rhodocyclaceae:g__Quatrionicoccus
Rahnella	90	11	0	0	44	0	0	40	0	0	0	p__"Proteobacteria":c__Gammaproteobacteria:o__"Enterobacteriales":f__Enterobacteriaceae:g__Rahnella
Ralstonia	272	219	0	211	119	211	0	135	0	213	0	p__"Proteobacteria":c__Betaproteobacteria:o__Burkholderiales:f__Burkholderiaceae:g__Ralstonia
Ramlibacter	6	3	0	1	1	0	0	0	0	0	0	p__"Proteobacteria":c__Betaproteobacteria:o__Burkholderiales:f__Comamonadaceae:g__Ramlibacter
Raoultella	49	41	0	0	6	0	0	0	0	0	0	p__"Proteobacteria":c__Gammaproteobacteria:o__"Enterobacteriales":f__Enterobacteriaceae:g__Raoultella
Rapidithrix	1	1	0	1	1	1	0	0	1	1	0	p__"Bacteroidetes":c__Sphingobacteriia:o__"Sphingobacteriales":f__Flammeovirgaceae:g__Rapidithrix
Rarobacter	4	4	0	4	0	2	0	0	0	1	0	p__"Actinobacteria":c__Actinobacteria:o__Actinomycetales:f__Rarobacteraceae:g__Rarobacter
Rathayibacter	11	11	0	10	0	1	0	0	0	0	0	p__"Actinobacteria":c__Actinobacteria:o__Actinomycetales:f__Microbacteriaceae:g__Rathayibacter
Reichenbachiella	1	1	0	1	1	1	0	0	1	1	0	p__"Bacteroidetes":c__Sphingobacteriia:o__"Sphingobacteriales":f__Flammeovirgaceae:g__Reichenbachiella
Reinekea	4	4	0	4	0	4	0	4	4	1	0	p__"Proteobacteria":c__Gammaproteobacteria:o__Oceanospirillales:f__Oceanospirillaceae:g__Reinekea
Renibacterium	12	11	0	11	11	0	0	11	0	0	0	p__"Actinobacteria":c__Actinobacteria:o__Actinomycetales:f__Micrococcaceae:g__Renibacterium
Rhabdochromatium	1	1	0	0	1	1	0	1	0	1	0	p__"Proteobacteria":c__Gammaproteobacteria:o__Chromatiales:f__Chromatiaceae:g__Rhabdochromatium
Rhabdothermus	1	1	0	1	0	1	0	1	1	1	0	p__Nitrospinae:c__Fimbriimonadia:o__Fimbriimonadales:f__Defluviitaleaceae:g__Rhabdothermus
Rhizobacter	6	6	0	0	4	0	0	5	0	0	0	p__"Proteobacteria":c__Gammaproteobacteria:o__Pseudomonadales:f__Pseudomonadaceae:g__Rhizobacter
Rhizobium	1600	1542	14	0	0	1383	0	635	0	49	0	p__"Proteobacteria":c__Alphaproteobacteria:o__Rhizobiales:f__Rhizobiaceae:g__Rhizobium
Rhodanobacter	51	47	0	34	28	30	0	0	0	0	0	p__"Proteobacteria":c__Gammaproteobacteria:o__Xanthomonadales:f__Xanthomonadaceae:g__Rhodanobacter
Rhodobaca	6	5	0	0	0	0	0	4	0	0	0	p__"Proteobacteria":c__Alphaproteobacteria:o__Rhodobacterales:f__Rhodobacteraceae:g__Rhodobaca
Rhodobacter	173	130	0	0	0	5	0	74	0	0	0	p__"Proteobacteria":c__Alphaproteobacteria:o__Rhodobacterales:f__Rhodobacteraceae:g__Rhodobacter
Rhodobium	4	4	0	0	0	4	0	3	0	4	0	p__"Proteobacteria":c__Alphaproteobacteria:o__Rhizobiales:f__Rhodobiaceae:g__Rhodobium
Rhodoblastus	6	6	0	0	0	6	0	6	0	6	0	p__"Proteobacteria":c__Alphaproteobacteria:o__Rhizobiales:f__Bradyrhizobiaceae:g__Rhodoblastus
Rhodocista	12	11	0	0	0	10	0	4	10	10	0	p__"Proteobacteria":c__Alphaproteobacteria:o__Rhodospirillales:f__Rhodospirillaceae:g__Rhodocista
Rhodococcus	31	28	0	11	0	22	0	0	4	0	0	p__"Actinobacteria":c__Actinobacteria:o__Actinomycetales:f__Nocardiaceae:g__Rhodococcus
Rhodocyclus	6	5	0	4	4	4	0	2	0	0	0	p__"Proteobacteria":c__Betaproteobacteria:o__Rhodocyclales:f__Rhodocyclaceae:g__Rhodocyclus
Rhodoferax	12	5	0	0	2	4	0	2	0	0	0	p__"Proteobacteria":c__Betaproteobacteria:o__Burkholderiales:f__Comamonadaceae:g__Rhodoferax
Rhodoglobus	3	2	0	3	2	0	0	0	0	0	0	p__"Actinobacteria":c__Actinobacteria:o__Actinomycetales:f__Microbacteriaceae:g__Rhodoglobus
Rhodoligotrophos	2	2	0	0	0	1	0	0	0	2	0	p__Nitrospinae:c__Thermoflexia:o__Candidatus Brocadiales:f__Candidatus Brocadiaceae:g__Rhodoligotrophos
Rhodomicrobium	8	8	0	0	0	7	0	8	0	8	0	p__"Proteobacteria":c__Alphaproteobacteria:o__Rhizobiales:f__Hyphomicrobiaceae:g__Rhodomicrobium
Rhodopila	2	2	0	1	0	2	0	2	0	2	0	p__"Proteobacteria":c__Alphaproteobacteria:o__Rhodospirillales:f__Acetobacteraceae:g__Rhodopila
Rhodopirellula	135	135	0	0	106	135	0	113	78	128	0	p__"Planctomycetes":c__Planctomycetia:o__Planctomycetales:f__Planctomycetaceae:g__Rhodopirellula
Rhodoplanes	15	14	0	0	0	14	0	13	0	14	0	p__"Proteobacteria":c__Alphaproteobacteria:o__Rhizobiales:f__Hyphomicrobiaceae:g__Rhodoplanes
Rhodopseudomonas	128	102	0	0	0	75	0	96	0	4	0	p__"Proteobacteria":c__Alphaproteobacteria:o__Rhizobiales:f__Bradyrhizobiaceae:g__Rhodopseudomonas
Rhodospira	2	2	0	0	0	2	0	2	0	0	0	p__"Proteobacteria":c__Alphaproteobacteria:o__Rhodospirillales:f__Rhodospirillaceae:g__Rhodospira
Rhodospirillum	17	13	0	0	0	11	0	12	11	1	0	p__"Proteobacteria":c__Alphaproteobacteria:o__Rhodospirillales:f__Rhodospirillaceae:g__Rhodospirillum
Rhodothalassium	1	1	0	0	0	1	0	0	1	0	0	p__"Proteobacteria":c__Alphaproteobacteria:o__Rhodobacterales:f__Rhodobacteraceae:g__Rhodothalassium
Rhodothermus	28	28	0	28	8	27	0	5	8	24	28	p__"Bacteroidetes":c__Sphingobacteriia:o__"Sphingobacteriales":f__"Rhodothermaceae":g__Rhodothermus
Rhodovarius	1	1	0	0	0	1	0	1	0	1	0	p__"Proteobacteria":c__Alphaproteobacteria:o__Rhodospirillales:f__Acetobacteraceae:g__Rhodovarius
Rhodovibrio	24	24	0	0	0	10	0	3	1	10	0	p__"Proteobacteria":c__Alphaproteobacteria:o__Rhodospirillales:f__Rhodospirillaceae:g__Rhodovibrio
Rhodovulum	50	45	0	0	0	3	0	2	10	0	0	p__"Proteobacteria":c__Alphaproteobacteria:o__Rhodobacterales:f__Rhodobacteraceae:g__Rhodovulum
Rickettsia	157	152	0	0	0	152	0	143	150	144	0	p__"Proteobacteria":c__Alphaproteobacteria:o__Rickettsiales:f__Rickettsiaceae:g__Rickettsia
Rikenella	2	2	0	2	2	2	0	0	2	0	0	p__"Bacteroidetes":c__"Bacteroidia":o__"Bacteroidales":f__"Rikenellaceae":g__Rikenella
Rivibacter	1	1	0	0	1	0	0	1	0	0	0	p__"Proteobacteria":c__Betaproteobacteria:o__Burkholderiales:f__Burkholderiales_incertae_sedis:g__Rivibacter
Robiginitalea	5	5	0	4	3	5	0	0	0	4	0	p__"Bacteroidetes":c__Flavobacteriia:o__"Flavobacteriales":f__Flavobacteriaceae:g__Robiginitalea
Robiginitomaculum	4	2	0	0	0	2	0	2	0	0	0	p__"Proteobacteria":c__Alphaproteobacteria:o__Caulobacterales:f__Hyphomonadaceae:g__Robiginitomaculum
Robinsoniella	5	5	0	5	0	5	0	3	0	4	0	p__Firmicutes:c__Erysipelotrichia:o__Erysipelotrichales:f__Bacillales_incertae_sedis:g__Robinsoniella
Roseateles	6	5	0	0	4	1	0	0	0	0	0	p__"Proteobacteria":c__Betaproteobacteria:o__Burkholderiales:f__Comamonadaceae:g__Roseateles
Roseburia	22	21	0	19	0	21	0	11	11	16	0	p__Firmicutes:c__Clostridia:o__Clostridiales:f__Lachnospiraceae:g__Roseburia
Roseibaca	1	1	0	0	0	0	0	1	1	0	0	p__"Proteobacteria":c__Alphaproteobacteria:o__Rhodobacterales:f__Rhodobacteraceae:g__Roseibaca
Roseibacillus	4	4	0	4	4	4	0	0	4	4	0	p__"Verrucomicrobia":c__Verrucomicrobiae:o__Verrucomicrobiales:f__Verrucomicrobiaceae:g__Roseibacillus
Roseibacterium	4	4	0	0	0	0	0	4	0	0	0	p__"Proteobacteria":c__Alphaproteobacteria:o__Rhodobacterales:f__Rhodobacteraceae:g__Roseibacterium
Roseibium	3	2	0	0	0	2	0	0	1	0	0	p__"Proteobacteria":c__Alphaproteobacteria:o__Rhodobacterales:f__Rhodobacteraceae:g__Roseibium
Roseicyclus	1	1	0	0	0	1	0	1	0	0	0	p__"Proteobacteria":c__Alphaproteobacteria:o__Rhodobacterales:f__Rhodobacteraceae:g__Roseicyclus
Roseiflexus	2	2	0	0	0	0	0	0	0	0	0	p__"Chloroflexi":c__Chloroflexia:o__"Chloroflexales":f__Chloroflexaceae:g__Roseiflexus
Roseimicrobium	1	1	0	1	1	1	0	1	0	1	0	p__Nitrospinae:c__Fimbriimonadia:o__Fimbriimonadales:f__Defluviitaleaceae:g__Roseimicrobium
Roseinatronobacter	3	1	0	0	0	0	0	0	0	0	0	p__"Proteobacteria":c__Alphaproteobacteria:o__Rhodobacterales:f__Rhodobacteraceae:g__Roseinatronobacter
Roseisalinus	1	1	0	0	0	0	0	0	0	0	0	p__"Proteobacteria":c__Alphaproteobacteria:o__Rhodobacterales:f__Rhodobacteraceae:g__Roseisalinus
Roseivirga	2	2	0	2	2	2	0	0	1	1	0	p__"Bacteroidetes":c__Sphingobacteriia:o__"Sphingobacteriales":f__Flammeovirgaceae:g__Roseivirga
Roseivivax	16	14	0	0	0	2	0	4	0	0	0	p__"Proteobacteria":c__Alphaproteobacteria:o__Rhodobacterales:f__Rhodobacteraceae:g__Roseivivax
Roseobacter	78	10	0	0	0	0	0	9	0	0	0	p__"Proteobacteria":c__Alphaproteobacteria:o__Rhodobacterales:f__Rhodobacteraceae:g__Roseobacter
Roseococcus	3	3	0	2	0	3	0	2	1	2	0	p__"Proteobacteria":c__Alphaproteobacteria:o__Rhodospirillales:f__Acetobacteraceae:g__Roseococcus
Roseomonas	58	56	0	38	0	45	0	35	3	39	0	p__"Proteobacteria":c__Alphaproteobacteria:o__Rhodospirillales:f__Acetobacteraceae:g__Roseomonas
Roseospira	3	3	0	0	0	2	0	2	2	1	0	p__"Proteobacteria":c__Alphaproteobacteria:o__Rhodospirillales:f__Rhodospirillaceae:g__Roseospira
Roseovarius	37	27	0	0	0	1	0	4	15	0	0	p__"Proteobacteria":c__Alphaproteobacteria:o__Rhodobacterales:f__Rhodobacteraceae:g__Roseovarius
Rothia	41	41	0	35	0	32	0	31	0	0	0	p__"Actinobacteria":c__Actinobacteria:o__Actinomycetales:f__Micrococcaceae:g__Rothia
Ruania	1	1	0	1	0	0	0	1	0	1	0	p__"Actinobacteria":c__Actinobacteria:o__Actinomycetales:f__Ruaniaceae:g__Ruania
Rubellimicrobium	7	7	0	0	0	7	0	7	3	0	0	p__"Proteobacteria":c__Alphaproteobacteria:o__Rhodobacterales:f__Rhodobacteraceae:g__Rubellimicrobium
Rubribacterium	1	1	0	0	0	1	0	1	1	0	0	p__"Proteobacteria":c__Alphaproteobacteria:o__Rhodobacterales:f__Rhodobacteraceae:g__Rubribacterium
Rubritalea	10	10	0	5	10	5	0	8	9	9	0	p__"Verrucomicrobia":c__Verrucomicrobiae:o__Verrucomicrobiales:f__"Rubritaleaceae":g__Rubritalea
Rubritepida	1	1	0	1	0	1	0	1	0	0	0	p__"Proteobacteria":c__Alphaproteobacteria:o__Rhodospirillales:f__Acetobacteraceae:g__Rubritepida
Rubrivivax	19	17	0	1	13	1	0	3	0	0	0	p__"Proteobacteria":c__Betaproteobacteria:o__Burkholderiales:f__Burkholderiales_incertae_sedis:g__Rubrivivax
Rubrobacter	7	7	0	6	7	5	0	0	2	6	6	p__"Actinobacteria":c__Actinobacteria:o__Rubrobacterales:f__Rubrobacteraceae:g__Rubrobacter
Ruegeria	63	54	0	0	0	3	0	0	0	0	0	p__"Proteobacteria":c__Alphaproteobacteria:o__Rhodobacterales:f__Rhodobacteraceae:g__Ruegeria
Rugamonas	2	1	0	0	1	0	0	1	0	0	0	p__"Proteobacteria":c__Gammaproteobacteria:o__Pseudomonadales:f__Pseudomonadaceae:g__Rugamonas
Ruminobacter	2	2	0	2	2	2	0	2	2	2	0	p__"Proteobacteria":c__Gammaproteobacteria:o__Aeromonadales:f__Succinivibrionaceae:g__Ruminobacter
Ruminococcus	83	66	0	28	0	44	0	28	0	15	0	p__Firmicutes:c__Clostridia:o__Clostridiales:f__Ruminococcaceae:g__Ruminococcus
Rummeliibacillus	16	16	0	14	0	0	0	13	0	14	0	p__Firmicutes:c__Erysipelotrichia:o__Erysipelotrichales:f__Bacillales_incertae_sedis:g__Rummeliibacillus
Saccharibacillus	3	3	0	2	3	2	0	2	2	0	0	p__Firmicutes:c__Erysipelotrichia:o__Erysipelotrichales:f__Bacillales_incertae_sedis:g__Saccharibacillus
Saccharibacter	1	1	0	1	0	1	0	0	0	1	0	p__"Proteobacteria":c__Alphaproteobacteria:o__Rhodospirillales:f__Acetobacteraceae:g__Saccharibacter
Saccharococcus	2	2	0	2	0	0	0	0	0	0	0	p__Firmicutes:c__Bacilli:o__Bacillales:f__Bacillaceae 1:g__Saccharococcus
Saccharofermentans	4	4	0	2	0	2	0	1	2	2	0	p__Firmicutes:c__Erysipelotrichia:o__Erysipelotrichales:f__Bacillales_incertae_sedis:g__Saccharofermentans
Saccharomonospora	16	4	0	0	0	0	0	0	16	0	0	p__"Actinobacteria":c__Actinobacteria:o__Actinomycetales:f__Pseudonocardiaceae:g__Saccharomonospora
Saccharophagus	6	5	0	5	0	4	0	0	0	0	0	p__"Proteobacteria":c__Gammaproteobacteria:o__Alteromonadales:f__Alteromonadaceae:g__Saccharophagus
Saccharopolyspora	4	4	0	4	0	1	0	0	0	0	0	p__"Actinobacteria":c__Actinobacteria:o__Actinomycetales:f__Pseudonocardiaceae:g__Saccharopolyspora
Saccharospirillum	3	2	0	0	2	2	0	0	0	1	0	p__"Proteobacteria":c__Gammaproteobacteria:o__Oceanospirillales:f__"Saccharospirillaceae":g__Saccharospirillum
Saccharothrix	2	1	0	0	0	1	0	0	0	1	0	p__"Actinobacteria":c__Actinobacteria:o__Actinomycetales:f__Pseudonocardiaceae:g__Saccharothrix
Sagittula	7	6	0	0	0	0	0	1	3	0	0	p__"Proteobacteria":c__Alphaproteobacteria:o__Rhodobacterales:f__Rhodobacteraceae:g__Sagittula
Salana	2	1	0	1	0	0	0	0	0	0	0	p__"Actinobacteria":c__Actinobacteria:o__Actinomycetales:f__Beutenbergiaceae:g__Salana
Salegentibacter	25	19	0	14	16	15	0	0	16	0	0	p__"Bacteroidetes":c__Flavobacteriia:o__"Flavobacteriales":f__Flavobacteriaceae:g__Salegentibacter
Salicola	14	14	0	14	14	14	0	1	14	14	0	p__"Proteobacteria":c__Gammaproteobacteria:o__Oceanospirillales:f__Oceanospirillales_incertae_sedis:g__Salicola
Salimicrobium	22	21	0	21	19	20	0	21	0	21	0	p__Firmicutes:c__Erysipelotrichia:o__Erysipelotrichales:f__Bacillales_incertae_sedis:g__Salimicrobium
Salinarimonas	2	2	0	0	0	2	0	1	1	0	0	p__"Proteobacteria":c__Alphaproteobacteria:o__Rhizobiales:f__Bradyrhizobiaceae:g__Salinarimonas
Salinibacillus	3	1	0	1	1	1	0	2	0	0	0	p__Firmicutes:c__Bacilli:o__Bacillales:f__Bacillaceae 2:g__Salinibacillus
Salinibacter	16	16	0	16	16	15	0	16	16	16	0	p__"Bacteroidetes":c__Sphingobacteriia:o__"Sphingobacteriales":f__"Rhodothermaceae":g__Salinibacter
Salinibacterium	37	11	0	0	0	0	0	0	0	0	0	p__"Actinobacteria":c__Actinobacteria:o__Actinomycetales:f__Microbacteriaceae:g__Salinibacterium
Salinicoccus	33	33	0	26	31	2	0	0	0	13	0	p__Firmicutes:c__Bacilli:o__Bacillales:f__Staphylococcaceae:g__Salinicoccus
Salinicola	12	11	0	9	10	11	0	0	0	10	0	p__"Proteobacteria":c__Gammaproteobacteria:o__Oceanospirillales:f__Halomonadaceae:g__Salinicola
Salinihabitans	1	1	0	0	0	0	0	1	0	0	0	p__"Proteobacteria":c__Alphaproteobacteria:o__Rhodobacterales:f__Rhodobacteraceae:g__Salinihabitans
Salinimicrobium	8	8	0	6	2	8	0	0	0	1	0	p__"Bacteroidetes":c__Flavobacteriia:o__"Flavobacteriales":f__Flavobacteriaceae:g__Salinimicrobium
Salinimonas	7	7	0	7	1	0	0	0	0	7	0	p__"Proteobacteria":c__Gammaproteobacteria:o__Alteromonadales:f__Alteromonadaceae:g__Salinimonas
Salinisphaera	8	8	0	6	8	8	0	3	0	6	0	p__"Proteobacteria":c__Gammaproteobacteria:o__"Salinisphaerales":f__"Salinisphaeraceae":g__Salinisphaera
Salinivibrio	38	38	1	38	30	36	0	15	0	28	0	p__"Proteobacteria":c__Gammaproteobacteria:o__"Vibrionales":f__Vibrionaceae:g__Salinivibrio
Salipiger	4	1	0	0	0	0	0	1	0	0	0	p__"Proteobacteria":c__Alphaproteobacteria:o__Rhodobacterales:f__Rhodobacteraceae:g__Salipiger
Salirhabdus	1	1	0	1	0	0	0	1	0	0	0	p__Firmicutes:c__Erysipelotrichia:o__Erysipelotrichales:f__Bacillales_incertae_sedis:g__Salirhabdus
Salisaeta	3	3	0	3	3	3	0	1	3	3	0	p__"Bacteroidetes":c__Sphingobacteriia:o__"Sphingobacteriales":f__"Rhodothermaceae":g__Salisaeta
Salmonella	1056	1041	0	977	908	1007	0	0	0	0	0	p__"Proteobacteria":c__Gammaproteobacteria:o__"Enterobacteriales":f__Enterobacteriaceae:g__Salmonella
Samsonia	1	1	0	0	1	0	0	1	0	0	0	p__"Proteobacteria":c__Gammaproteobacteria:o__"Enterobacteriales":f__Enterobacteriaceae:g__Samsonia
Sandaracinobacter	1	1	0	0	0	1	0	1	1	1	0	p__"Proteobacteria":c__Alphaproteobacteria:o__Sphingomonadales:f__Sphingomonadaceae:g__Sandaracinobacter
Sandarakinotalea	1	1	0	0	0	0	0	0	1	0	0	p__"Bacteroidetes":c__Flavobacteriia:o__"Flavobacteriales":f__Flavobacteriaceae:g__Sandarakinotalea
Sanguibacter	28	24	0	20	0	15	0	0	0	0	0	p__"Actinobacteria":c__Actinobacteria:o__Actinomycetales:f__Sanguibacteraceae:g__Sanguibacter
Saprospira	12	9	0	9	8	8	0	9	8	8	0	p__"Bacteroidetes":c__Sphingobacteriia:o__"Sphingobacteriales":f__"Saprospiraceae":g__Saprospira
Sarcina	2	2	0	2	0	2	0	2	2	2	0	P__Firmicutes:C__Clostridia:O__Clostridiales:F__Clostridiaceae 1:G__Sarcina
Scardovia	10	10	0	10	10	10	0	8	9	10	0	p__"Actinobacteria":c__Actinobacteria:o__Bifidobacteriales:f__Bifidobacteriaceae:g__Scardovia
Schlegelella	7	7	0	5	5	0	0	1	0	0	0	p__"Proteobacteria":c__Betaproteobacteria:o__Burkholderiales:f__Comamonadaceae:g__Schlegelella
Schumannella	1	1	0	0	0	0	0	0	0	0	0	p__"Actinobacteria":c__Actinobacteria:o__Actinomycetales:f__Microbacteriaceae:g__Schumannella
Schwartzia	7	7	0	1	1	1	0	1	0	1	0	p__Firmicutes:c__Clostridia:o__Clostridiales:f__Veillonellaceae:g__Schwartzia
Sedimentibacter	11	10	0	4	0	6	0	4	4	5	0	p__Firmicutes:c__Clostridia:o__Clostridiales:f__Clostridiales_Incertae Sedis XI:g__Sedimentibacter
Sediminibacillus	1	1	0	1	0	0	0	1	0	1	0	p__Firmicutes:c__Erysipelotrichia:o__Erysipelotrichales:f__Bacillales_incertae_sedis:g__Sediminibacillus
Sediminibacter	4	2	0	2	0	2	0	0	0	2	0	p__"Bacteroidetes":c__Flavobacteriia:o__"Flavobacteriales":f__Flavobacteriaceae:g__Sediminibacter
Sediminicola	13	13	0	8	4	12	0	0	0	13	0	p__"Bacteroidetes":c__Flavobacteriia:o__"Flavobacteriales":f__Flavobacteriaceae:g__Sediminicola
Sediminihabitans	4	2	0	2	0	0	0	0	0	0	0	p__Nitrospinae:c__Fimbriimonadia:o__Magnetococcales:f__Magnetococcaceae:g__Sediminihabitans
Sediminitomix	1	1	0	1	1	1	0	0	1	1	0	p__"Bacteroidetes":c__Sphingobacteriia:o__"Sphingobacteriales":f__Flammeovirgaceae:g__Sediminitomix
Segetibacter	1	1	0	1	1	1	0	1	1	1	0	p__"Bacteroidetes":c__Sphingobacteriia:o__"Sphingobacteriales":f__Chitinophagaceae:g__Segetibacter
Seinonella	1	1	0	1	1	1	0	1	1	1	0	p__Firmicutes:c__Bacilli:o__Bacillales:f__Thermoactinomycetaceae 2:g__Seinonella
Selenomonas	60	54	0	17	33	43	0	8	5	18	6	p__Firmicutes:c__Clostridia:o__Clostridiales:f__Veillonellaceae:g__Selenomonas
Seohaeicola	1	1	0	0	0	0	0	0	0	0	0	p__"Proteobacteria":c__Alphaproteobacteria:o__Rhodobacterales:f__Rhodobacteraceae:g__Seohaeicola
Serinibacter	2	2	0	2	0	0	0	2	0	0	0	p__"Actinobacteria":c__Actinobacteria:o__Actinomycetales:f__Beutenbergiaceae:g__Serinibacter
Serinicoccus	7	6	0	4	0	0	0	5	0	0	0	p__"Actinobacteria":c__Actinobacteria:o__Actinomycetales:f__Intrasporangiaceae:g__Serinicoccus
Serpens	1	1	0	0	1	1	0	0	0	0	0	p__"Proteobacteria":c__Gammaproteobacteria:o__Pseudomonadales:f__Pseudomonadaceae:g__Serpens
Serratia	507	492	0	0	370	13	0	0	0	28	0	p__"Proteobacteria":c__Gammaproteobacteria:o__"Enterobacteriales":f__Enterobacteriaceae:g__Serratia
Sharpea	4	4	0	4	4	4	0	0	3	4	0	p__Firmicutes:c__Erysipelotrichia:o__Erysipelotrichales:f__Bacillales_incertae_sedis:g__Sharpea
Shewanella	612	609	0	501	30	467	0	0	8	247	0	p__"Proteobacteria":c__Gammaproteobacteria:o__Alteromonadales:f__Shewanellaceae:g__Shewanella
Shimazuella	2	2	0	2	0	2	0	2	1	2	0	p__Firmicutes:c__Erysipelotrichia:o__Erysipelotrichales:f__Bacillales_incertae_sedis:g__Shimazuella
Shimia	7	5	0	0	0	4	0	2	0	0	0	p__"Proteobacteria":c__Alphaproteobacteria:o__Rhodobacterales:f__Rhodobacteraceae:g__Shimia
Shimwellia	13	13	0	0	0	0	0	13	13	1	0	p__"Proteobacteria":c__Gammaproteobacteria:o__"Enterobacteriales":f__Enterobacteriaceae:g__Shimwellia
Shinella	32	32	0	0	0	28	0	22	0	0	0	p__"Proteobacteria":c__Alphaproteobacteria:o__Rhizobiales:f__Rhizobiaceae:g__Shinella
Shuttleworthia	3	3	0	3	0	3	0	3	3	3	0	p__Firmicutes:c__Clostridia:o__Clostridiales:f__Lachnospiraceae:g__Shuttleworthia
Sideroxydans	5	5	0	2	2	0	0	4	0	0	0	p__Nitrospinae:c__Thermoflexia:o__Orbales:f__Orbaceae:g__Sideroxydans
Silicibacter	2	1	0	0	0	0	0	0	0	0	0	p__"Proteobacteria":c__Alphaproteobacteria:o__Rhodobacterales:f__Rhodobacteraceae:g__Silicibacter
Simkania	2	2	0	2	2	2	0	1	1	1	0	p__"Chlamydiae":c__Chlamydiia:o__Chlamydiales:f__Simkaniaceae:g__Simkania
Simonsiella	7	4	0	4	4	4	0	0	0	0	0	p__"Proteobacteria":c__Betaproteobacteria:o__Neisseriales:f__Neisseriaceae:g__Simonsiella
Simplicispira	1	0	0	0	0	0	0	0	0	0	0	p__"Proteobacteria":c__Betaproteobacteria:o__Burkholderiales:f__Comamonadaceae:g__Simplicispira
Singularimonas	1	0	0	0	1	0	0	0	0	0	0	p__"Proteobacteria":c__Gammaproteobacteria:o__Xanthomonadales:f__Sinobacteraceae:g__Singularimonas
Singulisphaera	13	11	0	10	10	10	0	10	10	10	0	p__"Planctomycetes":c__Planctomycetia:o__Planctomycetales:f__Planctomycetaceae:g__Singulisphaera
Sinobaca	3	3	0	3	0	1	0	3	0	3	0	p__Firmicutes:c__Erysipelotrichia:o__Erysipelotrichales:f__Bacillales_incertae_sedis:g__Sinobaca
Sinobacterium	1	1	0	1	1	1	0	0	0	1	0	p__Nitrospinae:c__Thermoflexia:o__Candidatus Brocadiales:f__Candidatus Brocadiaceae:g__Sinobacterium
Sinomonas	14	14	0	12	0	14	0	11	0	11	0	p__"Actinobacteria":c__Actinobacteria:o__Actinomycetales:f__Micrococcaceae:g__Sinomonas
Sinosporangium	2	2	0	1	0	2	0	0	0	0	0	p__"Actinobacteria":c__Actinobacteria:o__Actinomycetales:f__Streptosporangineae_incertae_sedis:g__Sinosporangium
Skermanella	5	5	0	0	0	5	0	4	3	4	0	p__"Proteobacteria":c__Alphaproteobacteria:o__Rhodospirillales:f__Rhodospirillaceae:g__Skermanella
Slackia	13	13	0	12	0	13	0	0	11	9	0	p__"Actinobacteria":c__Actinobacteria:o__Coriobacteriales:f__Coriobacteriaceae:g__Slackia
Sneathia	2	2	0	2	0	2	0	2	2	1	0	p__"Fusobacteria":c__Fusobacteriia:o__"Fusobacteriales":f__"Leptotrichiaceae":g__Sneathia
Sneathiella	5	5	0	0	0	4	0	4	0	2	0	p__"Proteobacteria":c__Alphaproteobacteria:o__Sneathiellales:f__Sneathiellaceae:g__Sneathiella
Sodalis	26	17	0	0	14	0	0	0	0	0	0	p__"Proteobacteria":c__Gammaproteobacteria:o__"Enterobacteriales":f__Enterobacteriaceae:g__Sodalis
Soehngenia	2	2	0	2	0	2	0	2	2	1	0	p__Firmicutes:c__Clostridia:o__Clostridiales:f__Clostridiales_Incertae Sedis XI:g__Soehngenia
Solibacillus	22	21	0	21	1	0	0	20	0	0	0	p__Firmicutes:c__Erysipelotrichia:o__Erysipelotrichales:f__Bacillales_incertae_sedis:g__Solibacillus
Solirubrobacter	4	4	0	1	1	4	0	2	4	0	0	p__"Actinobacteria":c__Actinobacteria:o__Solirubrobacterales:f__Solirubrobacteraceae:g__Solirubrobacter
Solobacterium	6	6	0	6	1	6	0	0	4	6	0	p__Firmicutes:c__Erysipelotrichia:o__Erysipelotrichales:f__Erysipelotrichaceae:g__Solobacterium
Soonwooa	1	1	0	1	1	1	0	0	0	1	0	p__"Bacteroidetes":c__Flavobacteriia:o__"Flavobacteriales":f__Flavobacteriaceae:g__Soonwooa
Sorangium	134	134	0	54	3	106	0	93	3	67	0	p__"Proteobacteria":c__Deltaproteobacteria:o__Myxococcales:f__Polyangiaceae:g__Sorangium
Sphaerisporangium	31	30	0	11	0	25	0	1	0	0	0	p__"Actinobacteria":c__Actinobacteria:o__Actinomycetales:f__Streptosporangiaceae:g__Sphaerisporangium
Sphaerobacter	2	2	0	2	0	2	0	2	0	2	0	p__"Chloroflexi":c__Thermomicrobia:o__Sphaerobacterales:f__Sphaerobacteraceae:g__Sphaerobacter
Sphaerochaeta	21	18	0	9	17	11	0	11	10	17	0	p__Nitrospinae:c__Fimbriimonadia:o__Fimbriimonadales:f__Fimbriimonadaceae:g__Sphaerochaeta
Sphaerotilus	11	10	0	0	0	9	0	0	0	0	0	p__"Proteobacteria":c__Betaproteobacteria:o__Burkholderiales:f__Burkholderiales_incertae_sedis:g__Sphaerotilus
Sphingobacterium	10	9	0	6	3	8	0	0	0	8	0	p__"Bacteroidetes":c__Sphingobacteriia:o__"Sphingobacteriales":f__Sphingobacteriaceae:g__Sphingobacterium
Sphingobium	156	154	0	1	0	114	0	84	111	114	0	p__"Proteobacteria":c__Alphaproteobacteria:o__Sphingomonadales:f__Sphingomonadaceae:g__Sphingobium
Sphingomonas	727	476	0	0	0	394	0	132	52	193	0	p__"Proteobacteria":c__Alphaproteobacteria:o__Sphingomonadales:f__Sphingomonadaceae:g__Sphingomonas
Sphingopyxis	110	85	0	0	0	77	0	45	58	38	0	p__"Proteobacteria":c__Alphaproteobacteria:o__Sphingomonadales:f__Sphingomonadaceae:g__Sphingopyxis
Sphingorhabdus	9	6	0	0	0	7	0	6	3	3	0	p__Nitrospinae:c__Fimbriimonadia:o__Fimbriimonadales:f__Defluviitaleaceae:g__Sphingorhabdus
Sphingosinicella	11	6	0	0	0	6	0	2	0	6	0	p__"Proteobacteria":c__Alphaproteobacteria:o__Sphingomonadales:f__Sphingomonadaceae:g__Sphingosinicella
Spirillospora	4	2	0	2	0	2	0	0	0	1	0	p__"Actinobacteria":c__Actinobacteria:o__Actinomycetales:f__Thermomonosporaceae:g__Spirillospora
Spirillum	4	3	0	2	2	2	0	0	0	0	0	p__"Proteobacteria":c__Betaproteobacteria:o__Nitrosomonadales:f__Spirillaceae:g__Spirillum
Spirochaeta	41	30	0	18	20	20	0	6	10	5	0	p__"Spirochaetes":c__Spirochaetia:o__Spirochaetales:f__Spirochaetaceae:g__Spirochaeta
Spiroplasma	122	121	0	104	98	115	0	0	64	74	0	p__"Tenericutes":c__Mollicutes:o__Entomoplasmatales:f__Spiroplasmataceae:g__Spiroplasma
Spirosoma	1	1	0	0	0	0	0	0	0	0	0	p__"Bacteroidetes":c__Sphingobacteriia:o__"Sphingobacteriales":f__Cytophagaceae:g__Spirosoma
Spongiispira	1	1	0	1	0	0	0	0	0	0	0	p__"Proteobacteria":c__Gammaproteobacteria:o__Oceanospirillales:f__Oceanospirillaceae:g__Spongiispira
Sporacetigenium	1	1	0	0	0	0	0	1	0	1	0	p__Firmicutes:c__Clostridia:o__Clostridiales:f__Peptostreptococcaceae:g__Sporacetigenium
Sporanaerobacter	2	2	0	2	0	2	0	1	2	1	0	p__Firmicutes:c__Clostridia:o__Clostridiales:f__Clostridiales_Incertae Sedis XI:g__Sporanaerobacter
Sporobacter	1	1	0	1	0	1	0	1	0	1	0	p__Firmicutes:c__Clostridia:o__Clostridiales:f__Ruminococcaceae:g__Sporobacter
Sporobacterium	1	1	0	1	0	1	0	1	0	1	0	p__Firmicutes:c__Clostridia:o__Clostridiales:f__Lachnospiraceae:g__Sporobacterium
Sporohalobacter	6	5	0	2	6	4	0	0	0	5	0	p__Firmicutes:c__Clostridia:o__Halanaerobiales:f__Halobacteroidaceae:g__Sporohalobacter
Sporolactobacillus	71	70	0	64	53	63	0	61	0	62	55	p__Firmicutes:c__Bacilli:o__Bacillales:f__Sporolactobacillaceae:g__Sporolactobacillus
Sporomusa	40	40	0	31	16	23	0	11	10	22	0	p__Firmicutes:c__Clostridia:o__Clostridiales:f__Veillonellaceae:g__Sporomusa
Sporosalibacterium	1	1	0	1	0	1	0	1	0	1	0	p__Firmicutes:c__Erysipelotrichia:o__Erysipelotrichales:f__Bacillales_incertae_sedis:g__Sporosalibacterium
Sporosarcina	123	90	0	62	62	42	0	42	0	3	0	p__Firmicutes:c__Bacilli:o__Bacillales:f__Planococcaceae:g__Sporosarcina
Stackebrandtia	5	5	0	4	0	5	0	0	0	0	0	p__"Actinobacteria":c__Actinobacteria:o__Actinomycetales:f__Glycomycetaceae:g__Stackebrandtia
Stakelama	2	1	0	0	0	1	0	1	1	0	0	p__"Proteobacteria":c__Alphaproteobacteria:o__Sphingomonadales:f__Sphingomonadaceae:g__Stakelama
Staphylococcus	1135	1131	0	1096	1115	948	0	783	901	1084	1	p__Firmicutes:c__Bacilli:o__Bacillales:f__Staphylococcaceae:g__Staphylococcus
Stappia	14	6	0	0	0	0	0	6	0	5	0	p__"Proteobacteria":c__Alphaproteobacteria:o__Rhodobacterales:f__Rhodobacteraceae:g__Stappia
Starkeya	27	15	0	0	0	0	0	23	0	0	0	p__"Proteobacteria":c__Alphaproteobacteria:o__Rhizobiales:f__Xanthobacteraceae:g__Starkeya
Stella	2	2	0	0	0	2	0	1	2	2	0	p__"Proteobacteria":c__Alphaproteobacteria:o__Rhodospirillales:f__Acetobacteraceae:g__Stella
Stenotrophomonas	147	133	0	7	12	7	0	0	0	0	0	p__"Proteobacteria":c__Gammaproteobacteria:o__Xanthomonadales:f__Xanthomonadaceae:g__Stenotrophomonas
Stenoxybacter	9	9	0	9	7	9	0	0	0	0	0	p__"Proteobacteria":c__Betaproteobacteria:o__Neisseriales:f__Neisseriaceae:g__Stenoxybacter
Steroidobacter	2	2	0	1	1	0	0	0	0	0	0	p__"Proteobacteria":c__Gammaproteobacteria:o__Xanthomonadales:f__Sinobacteraceae:g__Steroidobacter
Sterolibacterium	2	1	0	1	1	1	0	1	0	0	0	p__"Proteobacteria":c__Betaproteobacteria:o__Rhodocyclales:f__Rhodocyclaceae:g__Sterolibacterium
Stigmatella	16	15	0	5	11	0	0	0	0	0	0	p__"Proteobacteria":c__Deltaproteobacteria:o__Myxococcales:f__Cystobacteraceae:g__Stigmatella
Streptacidiphilus	21	20	0	17	0	0	0	0	16	4	0	p__"Actinobacteria":c__Actinobacteria:o__Actinomycetales:f__Streptomycetaceae:g__Streptacidiphilus
Streptobacillus	19	19	0	15	0	17	0	16	16	16	0	p__"Fusobacteria":c__Fusobacteriia:o__"Fusobacteriales":f__"Leptotrichiaceae":g__Streptobacillus
Streptococcus	2052	2051	0	1762	1980	2042	0	923	97	1989	0	p__Firmicutes:c__Bacilli:o__Lactobacillales:f__Streptococcaceae:g__Streptococcus
Streptomonospora	3	3	0	2	3	2	0	1	0	2	0	p__"Actinobacteria":c__Actinobacteria:o__Actinomycetales:f__Nocardiopsaceae:g__Streptomonospora
Streptomyces	5943	5817	0	2671	0	2853	0	1	2881	3121	3	p__"Actinobacteria":c__Actinobacteria:o__Actinomycetales:f__Streptomycetaceae:g__Streptomyces
Streptosporangium	59	58	0	47	0	57	0	0	51	0	3	p__"Actinobacteria":c__Actinobacteria:o__Actinomycetales:f__Streptosporangiaceae:g__Streptosporangium
Subtercola	12	8	0	6	2	0	0	4	0	0	0	p__"Actinobacteria":c__Actinobacteria:o__Actinomycetales:f__Microbacteriaceae:g__Subtercola
Succinatimonas	2	2	0	2	0	2	0	2	0	2	0	p__"Proteobacteria":c__Gammaproteobacteria:o__Aeromonadales:f__Succinivibrionaceae:g__Succinatimonas
Succiniclasticum	1	1	0	1	1	1	0	0	1	1	0	p__Firmicutes:c__Clostridia:o__Clostridiales:f__Veillonellaceae:g__Succiniclasticum
Succinimonas	1	1	0	1	1	1	0	1	1	1	0	p__"Proteobacteria":c__Gammaproteobacteria:o__Aeromonadales:f__Succinivibrionaceae:g__Succinimonas
Succinispira	1	1	0	1	1	1	0	1	1	1	0	p__Firmicutes:c__Clostridia:o__Clostridiales:f__Veillonellaceae:g__Succinispira
Succinivibrio	4	4	0	4	0	4	0	4	0	0	0	p__"Proteobacteria":c__Gammaproteobacteria:o__Aeromonadales:f__Succinivibrionaceae:g__Succinivibrio
Sulfitobacter	158	141	0	0	0	16	0	86	0	0	0	p__"Proteobacteria":c__Alphaproteobacteria:o__Rhodobacterales:f__Rhodobacteraceae:g__Sulfitobacter
Sulfobacillus	40	40	0	34	32	39	0	21	37	34	20	p__Firmicutes:c__Clostridia:o__Clostridiales:f__Clostridiales_Incertae Sedis XVII:g__Sulfobacillus
Sulfuricella	3	3	0	3	3	0	0	0	0	0	0	p__"Proteobacteria":c__Betaproteobacteria:o__Sulfuricellales:f__Sulfuricellaceae:g__Sulfuricella
Sulfuricurvum	3	3	0	3	0	3	0	3	3	3	0	p__"Proteobacteria":c__Epsilonproteobacteria:o__Campylobacterales:f__Helicobacteraceae:g__Sulfuricurvum
Sulfurihydrogenibium	16	16	0	16	0	16	0	0	7	10	0	p__"Aquificae":c__Aquificae:o__Aquificales:f__Hydrogenothermaceae:g__Sulfurihydrogenibium
Sulfurimonas	14	14	0	9	0	10	0	4	0	14	0	p__"Proteobacteria":c__Epsilonproteobacteria:o__Campylobacterales:f__Helicobacteraceae:g__Sulfurimonas
Sulfuritalea	3	3	0	0	3	3	0	3	0	0	0	p__"Proteobacteria":c__Betaproteobacteria:o__Rhodocyclales:f__Rhodocyclaceae:g__Sulfuritalea
Sulfurivirga	1	1	0	1	1	1	0	1	1	1	0	p__"Proteobacteria":c__Gammaproteobacteria:o__Thiotrichales:f__Piscirickettsiaceae:g__Sulfurivirga
Sulfurospirillum	19	16	0	10	0	11	0	8	15	14	0	p__"Proteobacteria":c__Epsilonproteobacteria:o__Campylobacterales:f__Campylobacteraceae:g__Sulfurospirillum
Sulfurovum	3	3	0	0	0	3	0	0	3	3	0	p__"Proteobacteria":c__Epsilonproteobacteria:o__Campylobacterales:f__Helicobacteraceae:g__Sulfurovum
Sutterella	6	6	0	0	6	6	0	2	0	6	0	p__"Proteobacteria":c__Betaproteobacteria:o__Burkholderiales:f__Sutterellaceae:g__Sutterella
Suttonella	2	2	0	2	2	2	0	0	1	1	0	p__"Proteobacteria":c__Gammaproteobacteria:o__Cardiobacteriales:f__Cardiobacteriaceae:g__Suttonella
Swaminathania	3	2	0	0	0	0	0	2	0	0	0	p__"Proteobacteria":c__Alphaproteobacteria:o__Rhodospirillales:f__Acetobacteraceae:g__Swaminathania
Symbiobacterium	8	8	0	8	8	8	0	7	7	6	0	p__Firmicutes:c__Clostridia:o__Clostridiales:f__Clostridiales_Incertae Sedis XVIII:g__Symbiobacterium
Syntrophobacter	6	6	0	5	6	6	0	5	1	5	0	p__"Proteobacteria":c__Deltaproteobacteria:o__Syntrophobacterales:f__Syntrophobacteraceae:g__Syntrophobacter
Syntrophobotulus	5	5	0	5	5	5	0	5	5	5	0	p__Firmicutes:c__Clostridia:o__Clostridiales:f__Peptococcaceae 1:g__Syntrophobotulus
Syntrophococcus	2	2	0	2	0	2	0	2	1	1	0	p__Firmicutes:c__Clostridia:o__Clostridiales:f__Lachnospiraceae:g__Syntrophococcus
Syntrophomonas	14	14	4	14	11	14	0	7	6	7	0	p__Firmicutes:c__Clostridia:o__Clostridiales:f__Syntrophomonadaceae:g__Syntrophomonas
Syntrophothermus	2	2	2	2	2	2	0	2	2	0	2	p__Firmicutes:c__Clostridia:o__Clostridiales:f__Syntrophomonadaceae:g__Syntrophothermus
Syntrophus	7	5	0	4	4	4	0	4	4	4	6	p__"Proteobacteria":c__Deltaproteobacteria:o__Syntrophobacterales:f__Syntrophaceae:g__Syntrophus
Tamlana	7	5	0	4	0	3	0	0	0	2	0	p__"Bacteroidetes":c__Flavobacteriia:o__"Flavobacteriales":f__Flavobacteriaceae:g__Tamlana
Tanticharoenia	3	3	0	0	0	3	0	0	0	0	0	p__"Proteobacteria":c__Alphaproteobacteria:o__Rhodospirillales:f__Acetobacteraceae:g__Tanticharoenia
Tardiphaga	1	1	0	0	0	0	0	1	0	1	0	p__Nitrospinae:c__Fimbriimonadia:o__Fimbriimonadales:f__Fimbriimonadaceae:g__Tardiphaga
Tateyamaria	4	4	0	0	0	0	0	0	0	0	0	p__"Proteobacteria":c__Alphaproteobacteria:o__Rhodobacterales:f__Rhodobacteraceae:g__Tateyamaria
Tatumella	11	11	0	5	2	7	0	0	0	0	0	p__"Proteobacteria":c__Gammaproteobacteria:o__"Enterobacteriales":f__Enterobacteriaceae:g__Tatumella
Taylorella	96	96	0	96	95	96	0	0	96	95	0	p__"Proteobacteria":c__Betaproteobacteria:o__Burkholderiales:f__Alcaligenaceae:g__Taylorella
Telluria	4	2	0	1	1	0	0	3	1	0	0	p__"Proteobacteria":c__Betaproteobacteria:o__Burkholderiales:f__Oxalobacteraceae:g__Telluria
Tenacibaculum	51	51	0	41	40	49	0	0	44	42	0	p__"Bacteroidetes":c__Flavobacteriia:o__"Flavobacteriales":f__Flavobacteriaceae:g__Tenacibaculum
Tenuibacillus	3	2	0	3	2	2	0	0	0	1	0	p__Firmicutes:c__Bacilli:o__Bacillales:f__Bacillaceae 2:g__Tenuibacillus
Tepidamorphus	1	1	0	0	0	1	0	1	0	1	0	p__"Proteobacteria":c__Alphaproteobacteria:o__Rhizobiales:f__Rhodobiaceae:g__Tepidamorphus
Tepidanaerobacter	9	9	0	3	0	9	0	3	3	3	0	p__Firmicutes:c__Clostridia:o__Clostridiales:f__Clostridiales_Incertae Sedis III:g__Tepidanaerobacter
Tepidibacter	8	7	0	3	0	1	0	2	1	1	0	p__Firmicutes:c__Clostridia:o__Clostridiales:f__Peptostreptococcaceae:g__Tepidibacter
Tepidimicrobium	7	5	0	4	0	4	0	4	4	4	0	p__Firmicutes:c__Clostridia:o__Clostridiales:f__Clostridiales_Incertae Sedis XI:g__Tepidimicrobium
Tepidimonas	6	6	0	3	3	1	0	4	0	2	0	p__"Proteobacteria":c__Betaproteobacteria:o__Burkholderiales:f__Burkholderiales_incertae_sedis:g__Tepidimonas
Tepidiphilus	2	1	0	0	1	0	0	0	0	0	0	p__"Proteobacteria":c__Betaproteobacteria:o__Hydrogenophilales:f__Hydrogenophilaceae:g__Tepidiphilus
Terasakiella	2	2	0	0	0	2	0	2	0	0	0	p__"Proteobacteria":c__Alphaproteobacteria:o__Rhizobiales:f__Methylocystaceae:g__Terasakiella
Teredinibacter	10	9	0	0	9	9	0	9	0	0	0	p__"Proteobacteria":c__Gammaproteobacteria:o__Alteromonadales:f__Alteromonadales_incertae_sedis:g__Teredinibacter
Terrabacter	34	17	0	9	0	16	0	0	0	0	0	p__"Actinobacteria":c__Actinobacteria:o__Actinomycetales:f__Intrasporangiaceae:g__Terrabacter
Terracoccus	4	1	0	1	0	0	0	0	0	0	0	p__"Actinobacteria":c__Actinobacteria:o__Actinomycetales:f__Intrasporangiaceae:g__Terracoccus
Terribacillus	33	33	0	33	27	32	0	31	0	30	0	p__Firmicutes:c__Erysipelotrichia:o__Erysipelotrichales:f__Bacillales_incertae_sedis:g__Terribacillus
Terrimonas	2	2	0	0	0	0	0	0	0	0	0	p__"Bacteroidetes":c__Sphingobacteriia:o__"Sphingobacteriales":f__Chitinophagaceae:g__Terrimonas
Tessaracoccus	14	14	0	4	0	5	0	0	1	2	0	p__"Actinobacteria":c__Actinobacteria:o__Actinomycetales:f__Propionibacteriaceae:g__Tessaracoccus
Tetragenococcus	57	57	0	10	57	54	0	52	0	42	1	p__Firmicutes:c__Bacilli:o__Lactobacillales:f__Enterococcaceae:g__Tetragenococcus
Tetrasphaera	14	14	0	13	0	8	0	0	11	4	0	p__"Actinobacteria":c__Actinobacteria:o__Actinomycetales:f__Intrasporangiaceae:g__Tetrasphaera
Thalassobacillus	17	17	0	16	0	0	0	16	0	0	0	p__Firmicutes:c__Bacilli:o__Bacillales:f__Bacillaceae 2:g__Thalassobacillus
Thalassobacter	8	2	0	0	0	1	0	3	0	0	0	p__"Proteobacteria":c__Alphaproteobacteria:o__Rhodobacterales:f__Rhodobacteraceae:g__Thalassobacter
Thalassobius	21	11	0	0	0	2	0	3	1	0	0	p__"Proteobacteria":c__Alphaproteobacteria:o__Rhodobacterales:f__Rhodobacteraceae:g__Thalassobius
Thalassococcus	2	1	0	0	0	0	0	0	0	0	0	p__"Proteobacteria":c__Alphaproteobacteria:o__Rhodobacterales:f__Rhodobacteraceae:g__Thalassococcus
Thalassolituus	14	14	0	9	12	12	0	0	0	0	0	p__"Proteobacteria":c__Gammaproteobacteria:o__Oceanospirillales:f__Oceanospirillaceae:g__Thalassolituus
Thalassomonas	8	7	0	3	1	3	0	1	5	0	0	p__"Proteobacteria":c__Gammaproteobacteria:o__Alteromonadales:f__Colwelliaceae:g__Thalassomonas
Thalassospira	85	85	0	0	0	85	0	79	0	70	11	p__"Proteobacteria":c__Alphaproteobacteria:o__Rhodospirillales:f__Rhodospirillaceae:g__Thalassospira
Thauera	39	38	0	28	26	24	0	31	19	29	0	p__"Proteobacteria":c__Betaproteobacteria:o__Rhodocyclales:f__Rhodocyclaceae:g__Thauera
Thermacetogenium	4	4	0	4	0	4	0	4	0	0	0	p__Firmicutes:c__Clostridia:o__Thermoanaerobacterales:f__Thermoanaerobacteraceae:g__Thermacetogenium
Thermaerobacter	8	8	0	8	8	8	0	8	7	8	2	p__Firmicutes:c__Clostridia:o__Clostridiales:f__Clostridiales_Incertae Sedis XVII:g__Thermaerobacter
Thermanaeromonas	2	2	0	1	0	1	0	0	1	0	0	p__Firmicutes:c__Clostridia:o__Thermoanaerobacterales:f__Thermoanaerobacteraceae:g__Thermanaeromonas
Thermanaerovibrio	8	8	0	3	0	3	0	3	8	3	0	p__"Synergistetes":c__Synergistia:o__Synergistales:f__Synergistaceae:g__Thermanaerovibrio
Thermasporomyces	1	1	0	1	0	1	0	0	0	0	0	p__"Actinobacteria":c__Actinobacteria:o__Actinomycetales:f__Nocardioidaceae:g__Thermasporomyces
Thermincola	5	5	0	5	0	5	0	5	0	5	0	p__Firmicutes:c__Clostridia:o__Clostridiales:f__Peptococcaceae 1:g__Thermincola
Thermoactinomyces	14	13	0	9	9	13	0	9	4	8	0	p__Firmicutes:c__Bacilli:o__Bacillales:f__Thermoactinomycetaceae 1:g__Thermoactinomyces
Thermoanaerobacter	72	69	5	69	0	49	0	47	37	39	7	p__Firmicutes:c__Clostridia:o__Thermoanaerobacterales:f__Thermoanaerobacteraceae:g__Thermoanaerobacter
Thermoanaerobacterium	35	19	11	20	0	33	0	18	29	34	0	p__Firmicutes:c__Clostridia:o__Clostridiales:f__Clostridiales_Incertae Sedis III:g__Thermoanaerobacterium
Thermobacillus	7	7	0	7	7	7	0	3	7	1	6	p__Firmicutes:c__Bacilli:o__Bacillales:f__Paenibacillaceae 1:g__Thermobacillus
Thermobispora	7	7	0	3	0	3	0	0	1	2	0	p__"Actinobacteria":c__Actinobacteria:o__Actinomycetales:f__Pseudonocardiaceae:g__Thermobispora
Thermocatellispora	1	1	0	1	0	1	0	0	0	0	0	p__Nitrospinae:c__Fimbriimonadia:o__Fimbriimonadales:f__Defluviitaleaceae:g__Thermocatellispora
Thermococcoides	1	1	0	1	0	0	0	0	0	1	0	p__"Thermotogae":c__Thermotogae:o__Thermotogales:f__Thermotogaceae:g__Thermococcoides
Thermodesulfatator	2	2	0	2	2	2	0	2	2	2	1	p__"Thermodesulfobacteria":c__Thermodesulfobacteria:o__Thermodesulfobacteriales:f__Thermodesulfobacteriaceae:g__Thermodesulfatator
Thermodesulfobacterium	5	5	0	4	4	4	0	4	0	3	3	p__"Thermodesulfobacteria":c__Thermodesulfobacteria:o__Thermodesulfobacteriales:f__Thermodesulfobacteriaceae:g__Thermodesulfobacterium
Thermodesulfobium	2	2	0	2	0	2	0	2	2	2	0	p__Firmicutes:c__Clostridia:o__Thermoanaerobacterales:f__Thermodesulfobiaceae:g__Thermodesulfobium
Thermodesulforhabdus	1	1	0	1	1	1	0	1	1	1	1	p__"Proteobacteria":c__Deltaproteobacteria:o__Syntrophobacterales:f__Syntrophobacteraceae:g__Thermodesulforhabdus
Thermodesulfovibrio	1	1	0	1	0	1	0	1	1	1	0	p__Nitrospirae:c__"Nitrospira":o__"Nitrospirales":f__"Nitrospiraceae":g__Thermodesulfovibrio
Thermoflavimicrobium	1	1	0	1	0	1	0	0	1	0	0	p__Firmicutes:c__Bacilli:o__Bacillales:f__Thermoactinomycetaceae 1:g__Thermoflavimicrobium
Thermogemmatispora	1	1	0	1	0	1	0	1	0	1	1	p__"Chloroflexi":c__Ktedonobacteria:o__Thermogemmatisporales:f__Thermogemmatisporaceae:g__Thermogemmatispora
Thermohalobacter	1	1	0	1	0	1	0	1	1	1	0	p__Firmicutes:c__Clostridia:o__Clostridiales:f__Clostridiaceae 3:g__Thermohalobacter
Thermohydrogenium	2	2	0	2	0	0	0	2	0	0	0	p__Firmicutes:c__Erysipelotrichia:o__Natranaerobiales:f__Natranaerobiaceae:g__Thermohydrogenium
Thermoleophilum	3	2	0	1	2	2	0	1	2	0	0	p__"Actinobacteria":c__Actinobacteria:o__Thermoleophilales:f__Thermoleophilaceae:g__Thermoleophilum
Thermomicrobium	3	3	0	3	0	3	0	3	0	3	3	p__"Chloroflexi":c__Thermomicrobia:o__Thermomicrobiales:f__Thermomicrobiaceae:g__Thermomicrobium
Thermomonas	18	15	0	14	12	6	0	1	1	4	0	p__"Proteobacteria":c__Gammaproteobacteria:o__Xanthomonadales:f__Xanthomonadaceae:g__Thermomonas
Thermomonospora	19	19	0	18	0	7	0	0	0	0	0	p__"Actinobacteria":c__Actinobacteria:o__Actinomycetales:f__Thermomonosporaceae:g__Thermomonospora
Thermopolyspora	1	1	0	1	0	1	0	1	0	1	0	p__"Actinobacteria":c__Actinobacteria:o__Actinomycetales:f__Streptosporangiaceae:g__Thermopolyspora
Thermosediminibacter	3	3	0	3	0	3	0	3	3	3	0	p__Firmicutes:c__Clostridia:o__Clostridiales:f__Clostridiales_Incertae Sedis III:g__Thermosediminibacter
Thermosipho	8	8	0	6	8	8	0	6	8	8	5	p__"Thermotogae":c__Thermotogae:o__Thermotogales:f__Fervidobacteriaceae:g__Thermosipho
Thermosulfurimonas	1	1	0	1	1	1	0	1	0	0	0	p__Nitrospinae:c__Fimbriimonadia:o__Fimbriimonadales:f__Fimbriimonadaceae:g__Thermosulfurimonas
Thermosyntropha	1	1	0	1	1	1	0	1	0	1	0	p__Firmicutes:c__Clostridia:o__Clostridiales:f__Syntrophomonadaceae:g__Thermosyntropha
Thermotalea	1	1	1	1	0	1	0	1	1	1	0	p__Firmicutes:c__Erysipelotrichia:o__Erysipelotrichales:f__Bacillales_incertae_sedis:g__Thermotalea
Thermotoga	23	23	0	21	23	23	0	23	2	23	0	p__"Thermotogae":c__Thermotogae:o__Thermotogales:f__Thermotogaceae:g__Thermotoga
Thermovenabulum	1	1	0	1	0	1	0	1	1	1	0	p__Firmicutes:c__Clostridia:o__Clostridiales:f__Clostridiales_Incertae Sedis III:g__Thermovenabulum
Thermovibrio	2	2	0	2	2	2	0	2	2	2	0	p__"Aquificae":c__Aquificae:o__Aquificales:f__Desulfurobacteriaceae:g__Thermovibrio
Thermovirga	3	3	0	3	0	3	0	3	3	3	0	p__"Synergistetes":c__Synergistia:o__Synergistales:f__Synergistaceae:g__Thermovirga
Thermovum	1	1	0	0	0	0	0	0	0	0	0	p__Nitrospinae:c__Fimbriimonadia:o__Fimbriimonadales:f__Mooreiaceae:g__Thermovum
Thermus	130	126	0	84	80	116	0	93	63	96	0	p__"Deinococcus-Thermus":c__Deinococci:o__Thermales:f__Thermaceae:g__Thermus
Thioalkalibacter	1	1	0	1	1	1	0	0	0	0	0	p__"Proteobacteria":c__Gammaproteobacteria:o__Chromatiales:f__Halothiobacillaceae:g__Thioalkalibacter
Thioalkalicoccus	1	1	0	1	1	0	0	0	0	0	0	p__"Proteobacteria":c__Gammaproteobacteria:o__Chromatiales:f__Chromatiaceae:g__Thioalkalicoccus
Thioalkalimicrobium	3	3	0	3	2	3	0	3	0	2	0	p__"Proteobacteria":c__Gammaproteobacteria:o__Thiotrichales:f__Piscirickettsiaceae:g__Thioalkalimicrobium
Thioalkalispira	1	1	0	1	1	0	0	0	1	0	0	p__"Proteobacteria":c__Gammaproteobacteria:o__Chromatiales:f__Ectothiorhodospiraceae:g__Thioalkalispira
Thioalkalivibrio	16	15	0	12	7	12	0	13	1	0	0	p__"Proteobacteria":c__Gammaproteobacteria:o__Chromatiales:f__Ectothiorhodospiraceae:g__Thioalkalivibrio
Thiobaca	2	2	0	2	1	2	0	1	0	0	0	p__"Proteobacteria":c__Gammaproteobacteria:o__Chromatiales:f__Chromatiaceae:g__Thiobaca
Thiobacillus	22	13	0	5	9	13	0	4	0	0	0	p__"Proteobacteria":c__Betaproteobacteria:o__Hydrogenophilales:f__Hydrogenophilaceae:g__Thiobacillus
Thiobacter	1	1	0	1	1	1	0	1	0	0	0	p__"Proteobacteria":c__Betaproteobacteria:o__Burkholderiales:f__Burkholderiales_incertae_sedis:g__Thiobacter
Thiocapsa	22	22	0	16	14	21	0	0	7	18	0	p__"Proteobacteria":c__Gammaproteobacteria:o__Chromatiales:f__Chromatiaceae:g__Thiocapsa
Thioclava	5	1	0	0	0	0	0	0	0	0	0	p__"Proteobacteria":c__Alphaproteobacteria:o__Rhodobacterales:f__Rhodobacteraceae:g__Thioclava
Thiococcus	4	2	0	2	2	2	0	0	0	0	0	p__"Proteobacteria":c__Gammaproteobacteria:o__Chromatiales:f__Chromatiaceae:g__Thiococcus
Thiocystis	10	9	0	7	9	6	0	6	0	0	0	p__"Proteobacteria":c__Gammaproteobacteria:o__Chromatiales:f__Chromatiaceae:g__Thiocystis
Thiodictyon	2	2	0	2	2	2	0	2	0	2	0	p__"Proteobacteria":c__Gammaproteobacteria:o__Chromatiales:f__Chromatiaceae:g__Thiodictyon
Thiofaba	1	1	0	1	1	1	0	1	0	0	0	p__"Proteobacteria":c__Gammaproteobacteria:o__Chromatiales:f__Halothiobacillaceae:g__Thiofaba
Thioflavicoccus	4	1	0	4	1	1	0	0	0	0	0	p__"Proteobacteria":c__Gammaproteobacteria:o__Chromatiales:f__Chromatiaceae:g__Thioflavicoccus
Thiohalocapsa	1	1	0	0	0	1	0	0	0	1	0	p__"Proteobacteria":c__Gammaproteobacteria:o__Chromatiales:f__Chromatiaceae:g__Thiohalocapsa
Thiohalospira	2	2	0	2	1	2	0	0	0	0	0	p__"Proteobacteria":c__Gammaproteobacteria:o__Chromatiales:f__Ectothiorhodospiraceae:g__Thiohalospira
Thiolamprovum	2	2	0	2	2	2	0	2	0	2	0	p__"Proteobacteria":c__Gammaproteobacteria:o__Chromatiales:f__Chromatiaceae:g__Thiolamprovum
Thiomicrospira	20	18	0	17	13	13	0	0	5	12	0	p__"Proteobacteria":c__Gammaproteobacteria:o__Thiotrichales:f__Piscirickettsiaceae:g__Thiomicrospira
Thiomonas	159	159	0	20	155	11	0	113	1	141	0	p__"Proteobacteria":c__Betaproteobacteria:o__Burkholderiales:f__Burkholderiales_incertae_sedis:g__Thiomonas
Thiophaeococcus	1	1	0	0	1	1	0	1	0	0	0	p__"Proteobacteria":c__Gammaproteobacteria:o__Chromatiales:f__Chromatiaceae:g__Thiophaeococcus
Thioreductor	1	1	0	0	0	1	0	1	1	1	0	p__"Proteobacteria":c__Epsilonproteobacteria:o__Nautiliales:f__Nautiliaceae:g__Thioreductor
Thiorhodococcus	9	9	0	5	4	8	0	0	0	4	0	p__"Proteobacteria":c__Gammaproteobacteria:o__Chromatiales:f__Chromatiaceae:g__Thiorhodococcus
Thiorhodospira	2	2	0	0	0	1	0	0	0	0	0	p__"Proteobacteria":c__Gammaproteobacteria:o__Chromatiales:f__Ectothiorhodospiraceae:g__Thiorhodospira
Thiorhodovibrio	4	3	0	0	2	2	0	0	0	0	0	p__"Proteobacteria":c__Gammaproteobacteria:o__Chromatiales:f__Chromatiaceae:g__Thiorhodovibrio
Thiothrix	47	46	0	32	0	42	0	29	0	18	0	p__"Proteobacteria":c__Gammaproteobacteria:o__Thiotrichales:f__Thiotrichaceae:g__Thiothrix
Thiovirga	1	1	0	1	1	1	0	1	1	1	0	p__"Proteobacteria":c__Gammaproteobacteria:o__Chromatiales:f__Halothiobacillaceae:g__Thiovirga
Thorsellia	1	1	0	1	1	1	0	1	1	1	0	p__"Proteobacteria":c__Gammaproteobacteria:o__"Enterobacteriales":f__Enterobacteriaceae:g__Thorsellia
Tindallia	4	3	0	3	0	3	0	3	0	3	0	p__Firmicutes:c__Clostridia:o__Clostridiales:f__Clostridiaceae 2:g__Tindallia
Tissierella	9	5	0	0	0	3	0	0	0	3	0	p__Firmicutes:c__Clostridia:o__Clostridiales:f__Clostridiales_Incertae Sedis XI:g__Tissierella
Tistrella	17	17	0	17	0	17	0	16	0	16	0	p__"Proteobacteria":c__Alphaproteobacteria:o__Rhodospirillales:f__Rhodospirillaceae:g__Tistrella
Trabulsiella	6	6	0	0	0	0	0	1	0	0	0	p__"Proteobacteria":c__Gammaproteobacteria:o__"Enterobacteriales":f__Enterobacteriaceae:g__Trabulsiella
Treponema	99	99	0	45	62	57	0	43	65	24	0	p__"Spirochaetes":c__Spirochaetia:o__Spirochaetales:f__Spirochaetaceae:g__Treponema
Trichococcus	10	10	0	10	9	0	0	10	0	10	0	p__Firmicutes:c__Bacilli:o__Lactobacillales:f__Carnobacteriaceae:g__Trichococcus
Tropheryma	9	9	0	9	0	9	0	0	0	9	0	p__"Actinobacteria":c__Actinobacteria:o__Actinomycetales:f__Cellulomonadaceae:g__Tropheryma
Tropicimonas	2	2	0	0	0	0	0	1	0	0	0	p__"Proteobacteria":c__Alphaproteobacteria:o__Rhodobacterales:f__Rhodobacteraceae:g__Tropicimonas
Truepera	4	4	0	3	0	4	0	4	4	4	4	p__"Deinococcus-Thermus":c__Deinococci:o__Deinococcales:f__Trueperaceae:g__Truepera
Trueperella	52	52	0	52	0	52	0	0	50	27	0	p__"Actinobacteria":c__Actinobacteria:o__Actinomycetales:f__Actinomycetaceae:g__Trueperella
Tsukamurella	4	4	0	4	0	4	0	0	4	0	0	p__"Actinobacteria":c__Actinobacteria:o__Actinomycetales:f__Tsukamurellaceae:g__Tsukamurella
Tuberibacillus	2	2	0	2	2	2	0	0	0	0	0	p__Firmicutes:c__Erysipelotrichia:o__Erysipelotrichales:f__Bacillales_incertae_sedis:g__Tuberibacillus
Tumebacillus	7	6	0	2	3	5	0	0	2	1	0	p__Firmicutes:c__Erysipelotrichia:o__Erysipelotrichales:f__Bacillales_incertae_sedis:g__Tumebacillus
Turicella	1	1	0	1	1	1	0	1	1	1	0	p__"Actinobacteria":c__Actinobacteria:o__Actinomycetales:f__Corynebacteriaceae:g__Turicella
Turicibacter	2	2	0	2	2	2	0	2	2	2	0	p__Firmicutes:c__Erysipelotrichia:o__Erysipelotrichales:f__Erysipelotrichaceae:g__Turicibacter
Uliginosibacterium	1	1	0	0	1	1	0	1	0	0	0	p__"Proteobacteria":c__Betaproteobacteria:o__Rhodocyclales:f__Rhodocyclaceae:g__Uliginosibacterium
Ulvibacter	5	5	0	3	0	3	0	0	0	0	0	p__"Bacteroidetes":c__Flavobacteriia:o__"Flavobacteriales":f__Flavobacteriaceae:g__Ulvibacter
Undibacterium	20	20	0	6	5	12	0	13	0	0	0	p__"Proteobacteria":c__Betaproteobacteria:o__Burkholderiales:f__Oxalobacteraceae:g__Undibacterium
Ureaplasma	36	36	0	35	36	36	0	0	0	35	0	p__"Tenericutes":c__Mollicutes:o__Mycoplasmatales:f__Mycoplasmataceae:g__Ureaplasma
Ureibacillus	38	38	0	37	37	13	0	36	37	0	0	p__Firmicutes:c__Bacilli:o__Bacillales:f__Planococcaceae:g__Ureibacillus
Uruburuella	2	2	0	2	2	1	0	2	0	0	0	p__"Proteobacteria":c__Betaproteobacteria:o__Neisseriales:f__Neisseriaceae:g__Uruburuella
Vadicella	3	3	0	0	0	0	0	3	0	0	0	p__"Proteobacteria":c__Alphaproteobacteria:o__Rhodobacterales:f__Rhodobacteraceae:g__Vadicella
Vagococcus	39	39	0	36	35	28	0	1	0	37	0	p__Firmicutes:c__Bacilli:o__Lactobacillales:f__Enterococcaceae:g__Vagococcus
Vampirovibrio	1	1	0	1	0	1	0	1	1	1	0	p__"Proteobacteria":c__Deltaproteobacteria:o__Bdellovibrionales:f__Bdellovibrionaceae:g__Vampirovibrio
Varibaculum	3	3	0	3	3	3	0	0	3	3	0	p__"Actinobacteria":c__Actinobacteria:o__Actinomycetales:f__Actinomycetaceae:g__Varibaculum
Variovorax	140	134	0	113	62	48	0	98	0	0	0	p__"Proteobacteria":c__Betaproteobacteria:o__Burkholderiales:f__Comamonadaceae:g__Variovorax
Vasilyevaea	3	3	0	0	0	3	0	3	0	2	0	p__"Proteobacteria":c__Alphaproteobacteria:o__Rhizobiales:f__Rhizobiales_incertae_sedis:g__Vasilyevaea
Veillonella	39	38	0	37	35	36	0	32	37	36	0	p__Firmicutes:c__Clostridia:o__Clostridiales:f__Veillonellaceae:g__Veillonella
Verrucomicrobium	6	6	0	6	5	6	0	3	6	0	0	p__"Verrucomicrobia":c__Verrucomicrobiae:o__Verrucomicrobiales:f__Verrucomicrobiaceae:g__Verrucomicrobium
Vibrio	1348	1263	0	372	36	774	0	311	965	573	0	p__"Proteobacteria":c__Gammaproteobacteria:o__"Vibrionales":f__Vibrionaceae:g__Vibrio
Victivallis	1	1	0	1	0	1	0	1	1	1	0	p__"Lentisphaerae":c__"Lentisphaeria":o__Victivallales:f__"Victivallaceae":g__Victivallis
Virgibacillus	140	131	0	81	66	60	0	78	0	20	0	p__Firmicutes:c__Bacilli:o__Bacillales:f__Bacillaceae 2:g__Virgibacillus
Viridibacillus	14	14	0	13	0	0	0	0	0	12	0	p__Firmicutes:c__Erysipelotrichia:o__Erysipelotrichales:f__Bacillales_incertae_sedis:g__Viridibacillus
Vitellibacter	3	2	0	2	3	2	0	0	3	1	0	p__"Bacteroidetes":c__Flavobacteriia:o__"Flavobacteriales":f__Flavobacteriaceae:g__Vitellibacter
Vitreoscilla	3	3	0	2	2	2	0	0	0	0	0	p__"Proteobacteria":c__Betaproteobacteria:o__Neisseriales:f__Neisseriaceae:g__Vitreoscilla
Vogesella	11	11	0	11	4	11	0	6	0	4	0	p__"Proteobacteria":c__Betaproteobacteria:o__Neisseriales:f__Neisseriaceae:g__Vogesella
Vulcanibacillus	1	1	0	1	1	0	0	1	0	1	0	p__Firmicutes:c__Erysipelotrichia:o__Erysipelotrichales:f__Bacillales_incertae_sedis:g__Vulcanibacillus
Vulcanithermus	1	1	0	1	0	1	0	1	1	1	0	p__"Deinococcus-Thermus":c__Deinococci:o__Thermales:f__Thermaceae:g__Vulcanithermus
Waddlia	7	7	0	6	6	6	0	6	0	4	0	p__"Chlamydiae":c__Chlamydiia:o__Chlamydiales:f__Waddliaceae:g__Waddlia
Wandonia	2	2	0	2	2	2	0	0	2	1	0	p__"Bacteroidetes":c__Flavobacteriia:o__"Flavobacteriales":f__Cryomorphaceae:g__Wandonia
Wautersiella	1	0	0	0	0	0	0	0	0	0	0	p__"Bacteroidetes":c__Flavobacteriia:o__"Flavobacteriales":f__Flavobacteriaceae:g__Wautersiella
Weissella	199	199	167	181	184	197	0	143	0	80	0	p__Firmicutes:c__Bacilli:o__Lactobacillales:f__Leuconostocaceae:g__Weissella
Wenxinia	2	2	0	0	0	1	0	1	0	0	0	p__"Proteobacteria":c__Alphaproteobacteria:o__Rhodobacterales:f__Rhodobacteraceae:g__Wenxinia
Williamsia	1	1	0	0	0	1	0	0	0	0	0	p__"Actinobacteria":c__Actinobacteria:o__Actinomycetales:f__Nocardiaceae:g__Williamsia
Winogradskyella	40	39	0	24	7	13	0	0	0	20	0	p__"Bacteroidetes":c__Flavobacteriia:o__"Flavobacteriales":f__Flavobacteriaceae:g__Winogradskyella
Wohlfahrtiimonas	4	4	0	4	4	4	0	0	0	4	0	p__"Proteobacteria":c__Gammaproteobacteria:o__Xanthomonadales:f__Xanthomonadaceae:g__Wohlfahrtiimonas
Wolinella	7	7	0	0	0	6	0	7	6	6	0	p__"Proteobacteria":c__Epsilonproteobacteria:o__Campylobacterales:f__Helicobacteraceae:g__Wolinella
Woodsholea	3	2	0	0	0	2	0	0	0	0	0	p__"Proteobacteria":c__Alphaproteobacteria:o__Caulobacterales:f__Hyphomonadaceae:g__Woodsholea
Xanthobacter	39	34	0	0	0	30	0	0	0	5	0	p__"Proteobacteria":c__Alphaproteobacteria:o__Rhizobiales:f__Xanthobacteraceae:g__Xanthobacter
Xanthomonas	289	242	0	254	249	259	0	262	0	249	0	p__"Proteobacteria":c__Gammaproteobacteria:o__Xanthomonadales:f__Xanthomonadaceae:g__Xanthomonas
Xenophilus	7	4	0	0	0	0	0	0	0	0	0	p__"Proteobacteria":c__Betaproteobacteria:o__Burkholderiales:f__Comamonadaceae:g__Xenophilus
Xenorhabdus	157	155	0	137	89	83	0	1	70	124	0	p__"Proteobacteria":c__Gammaproteobacteria:o__"Enterobacteriales":f__Enterobacteriaceae:g__Xenorhabdus
Xylanibacterium	1	1	0	0	0	0	0	0	0	0	0	p__"Actinobacteria":c__Actinobacteria:o__Actinomycetales:f__Promicromonosporaceae:g__Xylanibacterium
Xylanimicrobium	2	2	0	0	0	0	0	0	0	0	0	p__"Actinobacteria":c__Actinobacteria:o__Actinomycetales:f__Promicromonosporaceae:g__Xylanimicrobium
Xylanimonas	4	4	0	3	0	0	0	0	0	0	0	p__"Actinobacteria":c__Actinobacteria:o__Actinomycetales:f__Promicromonosporaceae:g__Xylanimonas
Xylella	96	96	0	96	95	95	0	1	6	93	0	p__"Proteobacteria":c__Gammaproteobacteria:o__Xanthomonadales:f__Xanthomonadaceae:g__Xylella
Yangia	1	1	0	0	0	0	0	0	0	0	0	p__"Proteobacteria":c__Alphaproteobacteria:o__Rhodobacterales:f__Rhodobacteraceae:g__Yangia
Yaniella	3	3	0	3	0	3	0	2	1	3	0	p__"Actinobacteria":c__Actinobacteria:o__Actinomycetales:f__Micrococcaceae:g__Yaniella
Yeosuana	2	2	0	2	0	0	0	0	0	0	0	p__"Bacteroidetes":c__Flavobacteriia:o__"Flavobacteriales":f__Flavobacteriaceae:g__Yeosuana
Yersinia	346	341	0	234	220	313	0	78	0	338	0	p__"Proteobacteria":c__Gammaproteobacteria:o__"Enterobacteriales":f__Enterobacteriaceae:g__Yersinia
Yonghaparkia	2	2	0	0	0	0	0	0	0	0	0	p__"Actinobacteria":c__Actinobacteria:o__Actinomycetales:f__Microbacteriaceae:g__Yonghaparkia
Yuhushiella	1	1	0	1	0	0	0	0	0	0	0	p__"Actinobacteria":c__Actinobacteria:o__Actinomycetales:f__Pseudonocardiaceae:g__Yuhushiella
Zeaxanthinibacter	1	1	0	1	0	1	0	0	1	1	0	p__"Bacteroidetes":c__Flavobacteriia:o__"Flavobacteriales":f__Flavobacteriaceae:g__Zeaxanthinibacter
Zhangella	1	1	0	0	0	1	0	1	0	0	0	p__"Proteobacteria":c__Alphaproteobacteria:o__Rhizobiales:f__Hyphomicrobiaceae:g__Zhangella
Zhihengliuella	12	12	0	8	0	3	0	7	0	0	0	p__"Actinobacteria":c__Actinobacteria:o__Actinomycetales:f__Micrococcaceae:g__Zhihengliuella
Zhouia	2	2	0	2	0	2	0	0	0	0	0	p__"Bacteroidetes":c__Flavobacteriia:o__"Flavobacteriales":f__Flavobacteriaceae:g__Zhouia
Zimmermannella	7	7	0	4	0	1	0	0	0	0	0	p__"Actinobacteria":c__Actinobacteria:o__Actinomycetales:f__Microbacteriaceae:g__Zimmermannella
Zobellella	7	7	0	2	3	6	0	1	0	7	0	p__"Proteobacteria":c__Gammaproteobacteria:o__Aeromonadales:f__Aeromonadaceae:g__Zobellella
Zoogloea	24	20	0	9	13	19	0	5	0	0	0	p__"Proteobacteria":c__Betaproteobacteria:o__Rhodocyclales:f__Rhodocyclaceae:g__Zoogloea
Zooshikella	6	6	0	6	6	6	0	5	0	6	0	p__"Proteobacteria":c__Gammaproteobacteria:o__Oceanospirillales:f__Hahellaceae:g__Zooshikella
Zunongwangia	8	8	0	6	6	6	0	0	0	0	0	p__"Bacteroidetes":c__Flavobacteriia:o__"Flavobacteriales":f__Flavobacteriaceae:g__Zunongwangia
Zymobacter	3	3	0	0	3	3	0	0	0	2	0	p__"Proteobacteria":c__Gammaproteobacteria:o__Oceanospirillales:f__Halomonadaceae:g__Zymobacter
Zymomonas	29	29	0	0	0	29	0	20	25	25	0	p__"Proteobacteria":c__Alphaproteobacteria:o__Sphingomonadales:f__Sphingomonadaceae:g__Zymomonas
Zymophilus	4	4	0	2	0	0	0	4	0	2	0	P__:Firmicutes:C__Negativicutes:O__SelenomonadalesF__:Veillonellaceae:G__Zymophilus
	84711	79692	439	44477	33676	48377	5	29296	25317	37669	321
	Total number of Sequences	Full length Sequences	V1	V2	V3	V4	V5	V6	V7	V8	V9	Lineage
Abiotrophia	100	100	0	75	25	0	0	75	0	0	0	p__Firmicutes:c__Bacilli:o__Lactobacillales:f__Aerococcaceae:g__Abiotrophia
Acaricomes	100	100	0	100	100	0	0	100	0	0	0	p__"Actinobacteria":c__Actinobacteria:o__Actinomycetales:f__Micrococcaceae:g__Acaricomes
Acetanaerobacterium	100	100	50	100	0	100	0	0	0	100	0	p__Firmicutes:c__Clostridia:o__Clostridiales:f__Ruminococcaceae:g__Acetanaerobacterium
Acetitomaculum	100	100	0	100	0	100	0	0	0	100	0	p__Firmicutes:c__Clostridia:o__Clostridiales:f__Lachnospiraceae:g__Acetitomaculum
Acetivibrio	100	60	0	40	0	40	0	0	0	40	0	p__Firmicutes:c__Clostridia:o__Clostridiales:f__Ruminococcaceae:g__Acetivibrio
Acetobacter	100	94.7541	0	9.5082	0	90.4918	0	85.2459	52.459	40.3279	0	p__"Proteobacteria":c__Alphaproteobacteria:o__Rhodospirillales:f__Acetobacteraceae:g__Acetobacter
Acetobacterium	100	100	0	71.875	0	84.375	0	59.375	78.125	78.125	0	p__Firmicutes:c__Clostridia:o__Clostridiales:f__Eubacteriaceae:g__Acetobacterium
Acetohalobium	100	100	0	100	100	83.3333	0	100	0	100	0	p__Firmicutes:c__Clostridia:o__Halanaerobiales:f__Halobacteroidaceae:g__Acetohalobium
Acetonema	100	100	0	50	50	100	0	50	100	100	0	p__Firmicutes:c__Clostridia:o__Clostridiales:f__Veillonellaceae:g__Acetonema
Acholeplasma	100	96.1538	0	88.4615	34.6154	96.1538	0	3.84615	80.7692	65.3846	0	p__"Tenericutes":c__Mollicutes:o__Acholeplasmatales:f__Acholeplasmataceae:g__Acholeplasma
Achromobacter	100	93.7198	0	80.6763	83.0918	32.8502	0	17.8744	0	89.372	0	p__"Proteobacteria":c__Betaproteobacteria:o__Burkholderiales:f__Alcaligenaceae:g__Achromobacter
Acidaminobacter	100	100	0	100	0	100	0	0	0	100	0	p__Firmicutes:c__Clostridia:o__Clostridiales:f__Clostridiales_Incertae Sedis XII:g__Acidaminobacter
Acidaminococcus	100	100	0	100	92.3077	100	0	61.5385	100	92.3077	0	p__Firmicutes:c__Clostridia:o__Clostridiales:f__Veillonellaceae:g__Acidaminococcus
Acidiferrobacter	100	100	0	100	100	100	0	50	0	0	0	p__Nitrospinae:c__Fimbriimonadia:o__Fimbriimonadales:f__Defluviitaleaceae:g__Acidiferrobacter
Acidimicrobium	100	100	0	100	0	100	0	0	25	0	0	p__"Actinobacteria":c__Actinobacteria:o__Acidimicrobiales:f__Acidimicrobiaceae:g__Acidimicrobium
Acidiphilium	100	100	0	84.375	0	89.0625	0	78.125	81.25	84.375	0	p__"Proteobacteria":c__Alphaproteobacteria:o__Rhodospirillales:f__Acetobacteraceae:g__Acidiphilium
Acidisoma	100	100	0	100	0	100	0	100	0	100	0	p__"Proteobacteria":c__Alphaproteobacteria:o__Rhodospirillales:f__Acetobacteraceae:g__Acidisoma
Acidisphaera	100	80	0	0	0	60	0	20	0	0	0	p__"Proteobacteria":c__Alphaproteobacteria:o__Rhodospirillales:f__Acetobacteraceae:g__Acidisphaera
Aciditerrimonas	100	66.6667	0	33.3333	0	33.3333	0	0	0	33.3333	0	p__"Actinobacteria":c__Actinobacteria:o__Acidimicrobiales:f__"Acidimicrobineae"_incertae_sedis:g__Aciditerrimonas
Acidithiobacillus	100	98.5075	0	89.5522	70.1493	97.7612	0	50.7463	88.0597	93.2836	0	p__"Proteobacteria":c__Gammaproteobacteria:o__Acidithiobacillales:f__Acidithiobacillaceae:g__Acidithiobacillus
Acidocella	100	100	0	70	0	70	0	70	0	70	0	p__"Proteobacteria":c__Alphaproteobacteria:o__Rhodospirillales:f__Acetobacteraceae:g__Acidocella
Acidomonas	100	100	0	0	0	100	0	0	0	0	0	p__"Proteobacteria":c__Alphaproteobacteria:o__Rhodospirillales:f__Acetobacteraceae:g__Acidomonas
Acidovorax	100	95	0	86	43	38	0	43	0	30	0	p__"Proteobacteria":c__Betaproteobacteria:o__Burkholderiales:f__Comamonadaceae:g__Acidovorax
Acinetobacter	100	99.9192	0	61.2773	89.2482	98.3023	0	85.3678	62.6516	53.3549	0	p__"Proteobacteria":c__Gammaproteobacteria:o__Pseudomonadales:f__Moraxellaceae:g__Acinetobacter
Acrocarpospora	100	87.5	0	37.5	0	0	0	0	0	0	0	p__"Actinobacteria":c__Actinobacteria:o__Actinomycetales:f__Streptosporangiaceae:g__Acrocarpospora
Actibacter	100	100	0	0	0	0	0	0	0	100	0	p__"Bacteroidetes":c__Flavobacteriia:o__"Flavobacteriales":f__Flavobacteriaceae:g__Actibacter
Actinoallomurus	100	100	0	69.697	0	100	0	0	0	69.697	0	p__"Actinobacteria":c__Actinobacteria:o__Actinomycetales:f__Thermomonosporaceae:g__Actinoallomurus
Actinoalloteichus	100	12.5	0	0	0	0	0	12.5	0	0	0	p__"Actinobacteria":c__Actinobacteria:o__Actinomycetales:f__Pseudonocardiaceae:g__Actinoalloteichus
Actinobacillus	100	91.3793	0	36.2069	57.7586	62.931	0	0	0	74.1379	0	p__"Proteobacteria":c__Gammaproteobacteria:o__Pasteurellales:f__Pasteurellaceae:g__Actinobacillus
Actinobaculum	100	100	0	42.3077	61.5385	100	0	11.5385	88.4615	0	30.7692	p__"Actinobacteria":c__Actinobacteria:o__Actinomycetales:f__Actinomycetaceae:g__Actinobaculum
Actinocatenispora	100	100	0	100	0	100	0	0	100	0	0	p__"Actinobacteria":c__Actinobacteria:o__Actinomycetales:f__Micromonosporaceae:g__Actinocatenispora
Actinocorallia	100	100	0	46.6667	0	100	0	0	0	0	0	p__"Actinobacteria":c__Actinobacteria:o__Actinomycetales:f__Thermomonosporaceae:g__Actinocorallia
Actinokineospora	100	100	0	0	0	0	0	0	0	0	0	p__"Actinobacteria":c__Actinobacteria:o__Actinomycetales:f__Pseudonocardiaceae:g__Actinokineospora
Actinomadura	100	95.7143	0	20	0	79.2857	0	3.57143	1.42857	0	0	p__"Actinobacteria":c__Actinobacteria:o__Actinomycetales:f__Thermomonosporaceae:g__Actinomadura
Actinomyces	100	72.7273	0	45.4545	18.1818	54.5455	0	0	9.09091	0	0	p__"Actinobacteria":c__Actinobacteria:o__Actinomycetales:f__Actinomycetaceae:g__Actinomyces
Actinoplanes	100	100	0	30.9524	0	52.381	0	0	0	11.9048	0	p__"Actinobacteria":c__Actinobacteria:o__Actinomycetales:f__Micromonosporaceae:g__Actinoplanes
Actinopolymorpha	100	100	0	75	0	100	0	0	100	75	0	p__"Actinobacteria":c__Actinobacteria:o__Actinomycetales:f__Nocardioidaceae:g__Actinopolymorpha
Actinopolyspora	100	90	3.33333	43.3333	0	86.6667	0	16.6667	70	33.3333	73.3333	p__"Actinobacteria":c__Actinobacteria:o__Actinomycetales:f__Actinopolysporaceae:g__Actinopolyspora
Actinotalea	100	50	0	50	0	0	0	0	0	0	0	p__"Actinobacteria":c__Actinobacteria:o__Actinomycetales:f__Cellulomonadaceae:g__Actinotalea
Adlercreutzia	100	100	0	0	0	0	0	0	0	0	0	p__"Actinobacteria":c__Actinobacteria:o__Coriobacteriales:f__Coriobacteriaceae:g__Adlercreutzia
Advenella	100	100	0	90.9091	63.6364	9.09091	0	81.8182	0	81.8182	0	p__"Proteobacteria":c__Betaproteobacteria:o__Burkholderiales:f__Alcaligenaceae:g__Advenella
Aequorivita	100	100	0	60	0	80	0	0	0	90	0	p__"Bacteroidetes":c__Flavobacteriia:o__"Flavobacteriales":f__Flavobacteriaceae:g__Aequorivita
Aeribacillus	100	100	0	100	53.3333	100	0	100	0	100	0	p__Firmicutes:c__Erysipelotrichia:o__Erysipelotrichales:f__Erysipelotrichaceae:g__Aeribacillus
Aeriscardovia	100	100	0	100	0	100	0	100	100	100	0	p__"Actinobacteria":c__Actinobacteria:o__Bifidobacteriales:f__Bifidobacteriaceae:g__Aeriscardovia
Aerococcus	100	100	0	78.9474	94.7368	81.5789	0	0	0	5.26316	0	p__Firmicutes:c__Bacilli:o__Lactobacillales:f__Aerococcaceae:g__Aerococcus
Aeromicrobium	100	97.2222	0	38.8889	0	83.3333	0	0	0	0	0	p__"Actinobacteria":c__Actinobacteria:o__Actinomycetales:f__Nocardioidaceae:g__Aeromicrobium
Aeromonas	100	99.8643	0	49.7965	83.0393	99.5929	0	38.9417	95.7938	97.5577	0	p__"Proteobacteria":c__Gammaproteobacteria:o__Aeromonadales:f__Aeromonadaceae:g__Aeromonas
Aestuariibacter	100	100	0	66.6667	66.6667	50	0	50	0	66.6667	0	p__"Proteobacteria":c__Gammaproteobacteria:o__Alteromonadales:f__Alteromonadaceae:g__Aestuariibacter
Aestuariibaculum	100	100	0	100	0	0	0	0	0	100	0	p__Nitrospinae:c__Fimbriimonadia:o__Fimbriimonadales:f__Defluviitaleaceae:g__Aestuariibaculum
Aestuariicola	100	100	0	100	0	0	0	0	0	0	0	p__"Bacteroidetes":c__Flavobacteriia:o__"Flavobacteriales":f__Flavobacteriaceae:g__Aestuariicola
Aestuariimicrobium	100	100	0	100	0	100	0	0	100	100	0	p__"Actinobacteria":c__Actinobacteria:o__Actinomycetales:f__Propionibacteriaceae:g__Aestuariimicrobium
Afifella	100	35.7143	0	0	0	14.2857	0	0	0	0	0	p__"Proteobacteria":c__Alphaproteobacteria:o__Rhizobiales:f__Rhodobiaceae:g__Afifella
Afipia	100	35.4167	0	0	0	2.08333	0	4.16667	0	0	0	p__"Proteobacteria":c__Alphaproteobacteria:o__Rhizobiales:f__Bradyrhizobiaceae:g__Afipia
Agaricicola	100	100	0	0	0	100	0	100	0	100	0	p__"Proteobacteria":c__Alphaproteobacteria:o__Rhodobacterales:f__Rhodobacteraceae:g__Agaricicola
Agarivorans	100	100	0	23.0769	69.2308	100	0	23.0769	0	100	0	p__"Proteobacteria":c__Gammaproteobacteria:o__Alteromonadales:f__Alteromonadaceae:g__Agarivorans
Aggregatibacter	100	96.6102	0	35.5932	61.0169	76.2712	0	88.1356	0	94.9153	0	p__"Proteobacteria":c__Gammaproteobacteria:o__Pasteurellales:f__Pasteurellaceae:g__Aggregatibacter
Agreia	100	31.25	0	31.25	0	0	0	0	0	0	0	p__"Actinobacteria":c__Actinobacteria:o__Actinomycetales:f__Microbacteriaceae:g__Agreia
Agrococcus	100	96.875	0	68.75	0	28.125	0	53.125	0	0	0	p__"Actinobacteria":c__Actinobacteria:o__Actinomycetales:f__Microbacteriaceae:g__Agrococcus
Agromyces	100	100	0	61.6667	1.66667	31.6667	0	46.6667	21.6667	91.6667	0	p__"Actinobacteria":c__Actinobacteria:o__Actinomycetales:f__Microbacteriaceae:g__Agromyces
Aidingimonas	100	100	0	50	50	0	0	0	0	100	0	p__"Proteobacteria":c__Gammaproteobacteria:o__Oceanospirillales:f__Halomonadaceae:g__Aidingimonas
Akkermansia	100	100	0	100	0	100	0	100	100	100	0	p__"Verrucomicrobia":c__Verrucomicrobiae:o__Verrucomicrobiales:f__Verrucomicrobiaceae:g__Akkermansia
Albidiferax	100	47.3684	0	10.5263	10.5263	57.8947	0	0	0	0	0	p__"Proteobacteria":c__Betaproteobacteria:o__Burkholderiales:f__Comamonadaceae:g__Albidiferax
Albidovulum	100	100	0	0	0	33.3333	0	66.6667	66.6667	0	0	p__"Proteobacteria":c__Alphaproteobacteria:o__Rhodobacterales:f__Rhodobacteraceae:g__Albidovulum
Albimonas	100	100	0	0	0	50	0	50	0	0	0	p__"Proteobacteria":c__Alphaproteobacteria:o__Rhodobacterales:f__Rhodobacteraceae:g__Albimonas
Alcaligenes	100	65.4545	0	10.9091	28.4848	59.3939	0	47.8788	0	0.606061	0	p__"Proteobacteria":c__Betaproteobacteria:o__Burkholderiales:f__Alcaligenaceae:g__Alcaligenes
Alcanivorax	100	100	0	55.5556	74.6032	84.127	0	0	0	59.5238	0	p__"Proteobacteria":c__Gammaproteobacteria:o__Oceanospirillales:f__Alcanivoracaceae:g__Alcanivorax
Algibacter	100	90	0	5	0	50	0	0	0	0	0	p__"Bacteroidetes":c__Flavobacteriia:o__"Flavobacteriales":f__Flavobacteriaceae:g__Algibacter
Algicola	100	50	0	50	50	25	0	25	0	25	0	p__"Proteobacteria":c__Gammaproteobacteria:o__Alteromonadales:f__Pseudoalteromonadaceae:g__Algicola
Algoriphagus	100	100	0	50	25	50	0	0	87.5	37.5	0	p__"Bacteroidetes":c__Sphingobacteriia:o__"Sphingobacteriales":f__Cyclobacteriaceae:g__Algoriphagus
Aliagarivorans	100	100	0	100	100	100	0	100	0	100	0	p__"Proteobacteria":c__Gammaproteobacteria:o__Alteromonadales:f__Alteromonadaceae:g__Aliagarivorans
Alicyclobacillus	100	95.8333	0	65.9722	75.6944	93.75	0	44.4444	88.8889	38.8889	0	p__Firmicutes:c__Bacilli:o__Bacillales:f__Alicyclobacillaceae:g__Alicyclobacillus
Aliidiomarina	100	100	0	100	100	100	0	0	0	100	0	p__Nitrospinae:c__Fimbriimonadia:o__Magnetococcales:f__SAR11:g__Aliidiomarina
Aliivibrio	100	100	0	51	70	99	0	31	0	3	0	p__"Proteobacteria":c__Gammaproteobacteria:o__"Vibrionales":f__Vibrionaceae:g__Aliivibrio
Alistipes	100	100	0	100	0	100	0	0	0	100	0	p__"Bacteroidetes":c__"Bacteroidia":o__"Bacteroidales":f__"Rikenellaceae":g__Alistipes
Alkalibacillus	100	100	0	100	36.3636	100	0	63.6364	0	95.4545	0	p__Firmicutes:c__Bacilli:o__Bacillales:f__Bacillaceae 2:g__Alkalibacillus
Alkalibacter	100	100	0	100	0	100	0	100	100	100	0	p__Firmicutes:c__Clostridia:o__Clostridiales:f__Eubacteriaceae:g__Alkalibacter
Alkalibacterium	100	100	0	100	100	74.5098	0	94.1176	1.96078	98.0392	17.6471	p__Firmicutes:c__Bacilli:o__Lactobacillales:f__Carnobacteriaceae:g__Alkalibacterium
Alkalilimnicola	100	100	0	100	100	100	0	25	0	0	0	p__"Proteobacteria":c__Gammaproteobacteria:o__Chromatiales:f__Ectothiorhodospiraceae:g__Alkalilimnicola
Alkaliphilus	100	100	8.69565	56.5217	0	52.1739	0	100	0	56.5217	0	p__Firmicutes:c__Clostridia:o__Clostridiales:f__Clostridiaceae 2:g__Alkaliphilus
Alkalispirillum	100	11.1111	0	0	0	0	0	0	0	0	0	p__"Proteobacteria":c__Gammaproteobacteria:o__Chromatiales:f__Ectothiorhodospiraceae:g__Alkalispirillum
Alkanibacter	100	100	0	100	100	100	0	0	0	0	0	p__"Proteobacteria":c__Gammaproteobacteria:o__Xanthomonadales:f__Sinobacteraceae:g__Alkanibacter
Alkanindiges	100	100	0	100	100	100	0	100	0	0	0	p__"Proteobacteria":c__Gammaproteobacteria:o__Pseudomonadales:f__Moraxellaceae:g__Alkanindiges
Allisonella	100	100	0	100	100	100	0	100	100	100	0	p__Firmicutes:c__Clostridia:o__Clostridiales:f__Veillonellaceae:g__Allisonella
Allobaculum	100	100	0	100	100	100	0	0	100	100	0	p__Firmicutes:c__Erysipelotrichia:o__Erysipelotrichales:f__Erysipelotrichaceae:g__Allobaculum
Allochromatium	100	100	0	25	81.25	93.75	0	18.75	18.75	100	0	p__"Proteobacteria":c__Gammaproteobacteria:o__Chromatiales:f__Chromatiaceae:g__Allochromatium
Allofustis	100	100	0	100	100	100	0	100	100	100	0	p__Firmicutes:c__Bacilli:o__Lactobacillales:f__Carnobacteriaceae:g__Allofustis
Alloiococcus	100	100	0	100	100	100	0	33.3333	0	33.3333	0	p__Firmicutes:c__Bacilli:o__Lactobacillales:f__Carnobacteriaceae:g__Alloiococcus
Allomonas	100	0	0	0	0	0	0	0	0	0	0	p__"Proteobacteria":c__Gammaproteobacteria:o__"Vibrionales":f__Vibrionaceae:g__Allomonas
Alloscardovia	100	100	0	100	0	33.3333	0	66.6667	0	0	0	p__"Actinobacteria":c__Actinobacteria:o__Bifidobacteriales:f__Bifidobacteriaceae:g__Alloscardovia
Alpinimonas	100	100	0	0	0	0	0	0	0	100	0	p__Nitrospinae:c__Thermoflexia:o__Candidatus Brocadiales:f__Candidatus Brocadiaceae:g__Alpinimonas
Altererythrobacter	100	100	0	0	0	17.2414	0	37.931	0	6.89655	0	p__"Proteobacteria":c__Alphaproteobacteria:o__Sphingomonadales:f__Erythrobacteraceae:g__Altererythrobacter
Alterococcus	100	100	0	100	100	100	0	100	100	100	0	p__"Verrucomicrobia":c__Opitutae:o__Opitutales:f__Opitutaceae:g__Alterococcus
Alteromonas	100	90.535	0	82.716	88.0658	73.251	0	49.7942	0	87.6543	0	p__"Proteobacteria":c__Gammaproteobacteria:o__Alteromonadales:f__Alteromonadaceae:g__Alteromonas
Alysiella	100	100	0	90	100	100	0	40	0	0	0	p__"Proteobacteria":c__Betaproteobacteria:o__Neisseriales:f__Neisseriaceae:g__Alysiella
Amaricoccus	100	85.7143	0	0	0	28.5714	0	57.1429	0	0	0	p__"Proteobacteria":c__Alphaproteobacteria:o__Rhodobacterales:f__Rhodobacteraceae:g__Amaricoccus
Ameyamaea	100	100	0	0	0	0	0	100	0	0	0	p__"Proteobacteria":c__Alphaproteobacteria:o__Rhodospirillales:f__Acetobacteraceae:g__Ameyamaea
Aminobacter	100	96.4286	0	0	0	82.1429	0	0	0	0	0	p__"Proteobacteria":c__Alphaproteobacteria:o__Rhizobiales:f__Phyllobacteriaceae:g__Aminobacter
Aminomonas	100	75	0	75	0	75	0	75	75	0	0	p__"Synergistetes":c__Synergistia:o__Synergistales:f__Synergistaceae:g__Aminomonas
Ammonifex	100	100	0	100	100	100	0	100	100	100	100	p__Firmicutes:c__Clostridia:o__Thermoanaerobacterales:f__Thermoanaerobacteraceae:g__Ammonifex
Ammoniphilus	100	100	0	71.4286	28.5714	28.5714	0	42.8571	0	71.4286	0	p__Firmicutes:c__Bacilli:o__Bacillales:f__Paenibacillaceae 2:g__Ammoniphilus
Amnibacterium	100	100	0	50	0	0	0	0	0	0	0	p__"Actinobacteria":c__Actinobacteria:o__Actinomycetales:f__Microbacteriaceae:g__Amnibacterium
Amorphus	100	100	0	0	0	50	0	50	0	0	0	p__"Proteobacteria":c__Alphaproteobacteria:o__Rhizobiales:f__Rhizobiales_incertae_sedis:g__Amorphus
Amphibacillus	100	92.3077	0	19.2308	76.9231	92.3077	0	65.3846	0	0	0	p__Firmicutes:c__Bacilli:o__Bacillales:f__Bacillaceae 2:g__Amphibacillus
Amphritea	100	100	0	88.8889	55.5556	55.5556	0	55.5556	0	44.4444	0	p__"Proteobacteria":c__Gammaproteobacteria:o__Oceanospirillales:f__Oceanospirillaceae:g__Amphritea
Amycolatopsis	100	66.6667	0	33.3333	0	0	0	0	0	0	0	p__"Actinobacteria":c__Actinobacteria:o__Actinomycetales:f__Pseudonocardiaceae:g__Amycolatopsis
Anaeroarcus	100	100	0	100	0	0	0	100	0	0	0	p__Firmicutes:c__Clostridia:o__Clostridiales:f__Veillonellaceae:g__Anaeroarcus
Anaerobacillus	100	100	0	100	80	0	0	20	0	100	0	p__Firmicutes:c__Erysipelotrichia:o__Erysipelotrichales:f__Erysipelotrichaceae:g__Anaerobacillus
Anaerobacter	100	100	0	100	0	100	0	50	100	100	0	p__Firmicutes:c__Clostridia:o__Clostridiales:f__Clostridiaceae 1:g__Anaerobacter
Anaerobaculum	100	100	0	100	0	100	0	100	100	100	100	p__"Synergistetes":c__Synergistia:o__Synergistales:f__Synergistaceae:g__Anaerobaculum
Anaerobiospirillum	100	100	0	50	0	75	0	25	50	25	0	p__"Proteobacteria":c__Gammaproteobacteria:o__Aeromonadales:f__Succinivibrionaceae:g__Anaerobiospirillum
Anaerobranca	100	100	0	100	0	100	0	80	90	100	0	p__Firmicutes:c__Clostridia:o__Clostridiales:f__Clostridiales_Incertae Sedis XIV:g__Anaerobranca
Anaerococcus	100	100	0	65.2174	0	100	0	60.8696	86.9565	73.913	0	p__Firmicutes:c__Clostridia:o__Clostridiales:f__Clostridiales_Incertae Sedis XI:g__Anaerococcus
Anaerofilum	100	100	0	100	0	100	0	0	100	100	0	p__Firmicutes:c__Clostridia:o__Clostridiales:f__Ruminococcaceae:g__Anaerofilum
Anaerofustis	100	100	0	100	0	100	0	0	100	100	0	p__Firmicutes:c__Clostridia:o__Clostridiales:f__Eubacteriaceae:g__Anaerofustis
Anaeroglobus	100	100	0	100	100	100	0	100	0	100	0	p__Firmicutes:c__Clostridia:o__Clostridiales:f__Veillonellaceae:g__Anaeroglobus
Anaerolinea	100	100	0	100	0	100	0	50	0	50	0	p__"Chloroflexi":c__Anaerolineae:o__Anaerolineales:f__Anaerolineaceae:g__Anaerolinea
Anaeromusa	100	100	0	100	0	0	0	0	0	100	0	p__Firmicutes:c__Clostridia:o__Clostridiales:f__Veillonellaceae:g__Anaeromusa
Anaeromyxobacter	100	100	0	91.3043	86.9565	91.3043	0	0	95.6522	95.6522	0	p__"Proteobacteria":c__Deltaproteobacteria:o__Myxococcales:f__Cystobacteraceae:g__Anaeromyxobacter
Anaeroplasma	100	100	0	33.3333	0	100	0	0	100	100	0	p__"Tenericutes":c__Mollicutes:o__Anaeroplasmatales:f__Anaeroplasmataceae:g__Anaeroplasma
Anaerorhabdus	100	100	0	100	100	100	0	0	0	0	0	p__"Bacteroidetes":c__"Bacteroidia":o__"Bacteroidales":f__Bacteroidaceae:g__Anaerorhabdus
Anaerosalibacter	100	100	0	100	0	100	0	50	0	50	0	p__Nitrospinae:c__Thermoflexia:o__Candidatus Brocadiales:f__Candidatus Brocadiaceae:g__Anaerosalibacter
Anaerosinus	100	100	0	100	100	100	0	100	0	100	0	p__Firmicutes:c__Clostridia:o__Clostridiales:f__Veillonellaceae:g__Anaerosinus
Anaerosphaera	100	100	0	100	0	100	0	100	100	100	0	p__Firmicutes:c__Clostridia:o__Clostridiales:f__Peptoniphilaceae:g__Anaerosphaera
Anaerosporobacter	100	50	0	50	0	50	0	50	0	50	0	p__Firmicutes:c__Clostridia:o__Clostridiales:f__Lachnospiraceae:g__Anaerosporobacter
Anaerostipes	100	88.8889	0	33.3333	0	44.4444	0	11.1111	11.1111	33.3333	0	p__Firmicutes:c__Clostridia:o__Clostridiales:f__Lachnospiraceae:g__Anaerostipes
Anaerotruncus	100	100	0	50	0	100	0	0	0	50	0	p__Firmicutes:c__Clostridia:o__Clostridiales:f__Ruminococcaceae:g__Anaerotruncus
Anaerovibrio	100	100	33.3333	100	66.6667	66.6667	0	0	66.6667	100	0	p__Firmicutes:c__Clostridia:o__Clostridiales:f__Veillonellaceae:g__Anaerovibrio
Anaerovirgula	100	100	0	100	0	100	0	100	0	100	0	p__Firmicutes:c__Clostridia:o__Clostridiales:f__Clostridiaceae 2:g__Anaerovirgula
Anaerovorax	100	100	0	50	0	50	0	0	50	50	0	p__Firmicutes:c__Clostridia:o__Clostridiales:f__Clostridiales_Incertae Sedis XIII:g__Anaerovorax
Anaplasma	100	100	0	0	0	100	0	0	0	0	0	p__"Proteobacteria":c__Alphaproteobacteria:o__Rickettsiales:f__Anaplasmataceae:g__Anaplasma
Ancylobacter	100	95	0	0	0	75	0	85	0	65	0	p__"Proteobacteria":c__Alphaproteobacteria:o__Rhizobiales:f__Xanthobacteraceae:g__Ancylobacter
Anderseniella	100	100	0	0	0	100	0	0	0	0	0	p__"Proteobacteria":c__Alphaproteobacteria:o__Rhizobiales:f__Rhodobiaceae:g__Anderseniella
Andreprevotia	100	100	0	100	100	100	0	100	100	0	0	p__"Proteobacteria":c__Betaproteobacteria:o__Neisseriales:f__Neisseriaceae:g__Andreprevotia
Aneurinibacillus	100	100	0	92.8571	100	97.619	0	61.9048	28.5714	78.5714	4.7619	p__Firmicutes:c__Bacilli:o__Bacillales:f__Paenibacillaceae 2:g__Aneurinibacillus
Angulomicrobium	100	100	0	0	0	0	0	100	0	100	0	p__"Proteobacteria":c__Alphaproteobacteria:o__Rhizobiales:f__Hyphomicrobiaceae:g__Angulomicrobium
Angustibacter	100	100	0	100	0	66.6667	0	0	0	66.6667	0	p__"Actinobacteria":c__Actinobacteria:o__Actinomycetales:f__Kineosporiaceae:g__Angustibacter
Anoxybacillus	100	95.7447	0	59.5745	59.5745	71.2766	0	80.8511	56.383	84.0426	0	p__Firmicutes:c__Bacilli:o__Bacillales:f__Bacillaceae 1:g__Anoxybacillus
Antarctobacter	100	91.6667	0	0	0	0	0	8.33333	0	0	0	p__"Proteobacteria":c__Alphaproteobacteria:o__Rhodobacterales:f__Rhodobacteraceae:g__Antarctobacter
Aquabacter	100	100	0	0	0	0	0	0	0	100	0	p__Nitrospinae:c__Fimbriimonadia:o__Fimbriimonadales:f__Fimbriimonadaceae:g__Aquabacter
Aquabacterium	100	100	0	0	0	0	0	0	0	0	0	p__"Proteobacteria":c__Betaproteobacteria:o__Burkholderiales:f__Burkholderiales_incertae_sedis:g__Aquabacterium
Aquamicrobium	100	100	0	0	0	0	0	0	0	0	0	p__"Proteobacteria":c__Alphaproteobacteria:o__Rhizobiales:f__Phyllobacteriaceae:g__Aquamicrobium
Aquaspirillum	100	84.6154	0	38.4615	53.8462	15.3846	0	30.7692	0	15.3846	0	p__"Proteobacteria":c__Betaproteobacteria:o__Neisseriales:f__Neisseriaceae:g__Aquaspirillum
Aquifex	100	100	0	25	25	100	0	100	25	25	25	p__"Aquificae":c__Aquificae:o__Aquificales:f__Aquificaceae:g__Aquifex
Aquimarina	100	96.1538	0	38.4615	46.1538	92.3077	0	0	0	11.5385	0	p__"Bacteroidetes":c__Flavobacteriia:o__"Flavobacteriales":f__Flavobacteriaceae:g__Aquimarina
Aquimonas	100	50	0	50	50	50	0	0	0	0	0	p__"Proteobacteria":c__Gammaproteobacteria:o__Xanthomonadales:f__Xanthomonadaceae:g__Aquimonas
Aquincola	100	66.6667	0	0	66.6667	0	0	0	0	0	0	p__"Proteobacteria":c__Betaproteobacteria:o__Burkholderiales:f__Burkholderiales_incertae_sedis:g__Aquincola
Aquisalibacillus	100	100	0	100	100	100	0	0	0	0	0	p__Firmicutes:c__Erysipelotrichia:o__Erysipelotrichales:f__Erysipelotrichaceae:g__Aquisalibacillus
Aquisalimonas	100	100	0	0	0	100	0	0	0	0	0	p__"Proteobacteria":c__Gammaproteobacteria:o__Chromatiales:f__Ectothiorhodospiraceae:g__Aquisalimonas
Aquisphaera	100	100	0	100	0	100	0	0	100	100	0	p__Nitrospinae:c__Fimbriimonadia:o__Fimbriimonadales:f__Mooreiaceae:g__Aquisphaera
Aquitalea	100	100	0	78.5714	50	28.5714	0	50	0	0	0	p__"Proteobacteria":c__Betaproteobacteria:o__Neisseriales:f__Neisseriaceae:g__Aquitalea
Arcanobacterium	100	66.6667	0	6.66667	0	60	0	0	60	60	0	p__"Actinobacteria":c__Actinobacteria:o__Actinomycetales:f__Actinomycetaceae:g__Arcanobacterium
Arcobacter	100	100	0	69.8413	0	90.4762	0	88.8889	84.127	92.0635	0	p__"Proteobacteria":c__Epsilonproteobacteria:o__Campylobacterales:f__Campylobacteraceae:g__Arcobacter
Ardenticatena	100	100	0	100	0	100	0	100	0	0	0	p__Nitrospinae:c__Ardenticatenia:o__Ardenticatenales:f__Ardenticatenaceae:g__Ardenticatena
Arenibacter	100	100	0	41.3793	100	37.931	0	0	0	0	0	p__"Bacteroidetes":c__Flavobacteriia:o__"Flavobacteriales":f__Flavobacteriaceae:g__Arenibacter
Arenimonas	100	77.7778	0	0	44.4444	33.3333	0	22.2222	0	11.1111	0	p__"Proteobacteria":c__Gammaproteobacteria:o__Xanthomonadales:f__Xanthomonadaceae:g__Arenimonas
Arhodomonas	100	85.7143	0	85.7143	14.2857	85.7143	0	0	85.7143	28.5714	0	p__"Proteobacteria":c__Gammaproteobacteria:o__Chromatiales:f__Ectothiorhodospiraceae:g__Arhodomonas
Arsenicicoccus	100	83.3333	0	83.3333	0	83.3333	0	0	0	0	0	p__"Actinobacteria":c__Actinobacteria:o__Actinomycetales:f__Intrasporangiaceae:g__Arsenicicoccus
Arsenophonus	100	91.8367	0	73.4694	6.12245	63.2653	0	2.04082	0	65.3061	0	p__"Proteobacteria":c__Gammaproteobacteria:o__"Enterobacteriales":f__Enterobacteriaceae:g__Arsenophonus
Arthrobacter	100	97.9985	0	40.5697	0	57.5058	0	46.8052	0	72.9792	0	p__"Actinobacteria":c__Actinobacteria:o__Actinomycetales:f__Micrococcaceae:g__Arthrobacter
Asaia	100	100	0	0	0	100	0	95.4887	99.2481	100	0	p__"Proteobacteria":c__Alphaproteobacteria:o__Rhodospirillales:f__Acetobacteraceae:g__Asaia
Asteroleplasma	100	100	0	100	100	100	0	0	0	100	0	p__"Tenericutes":c__Mollicutes:o__Anaeroplasmatales:f__Anaeroplasmataceae:g__Asteroleplasma
Asticcacaulis	100	87.5	0	0	0	0	0	0	81.25	0	0	p__"Proteobacteria":c__Alphaproteobacteria:o__Caulobacterales:f__Caulobacteraceae:g__Asticcacaulis
Atopobium	100	96	0	76	0	96	0	0	88	48	0	p__"Actinobacteria":c__Actinobacteria:o__Coriobacteriales:f__Coriobacteriaceae:g__Atopobium
Atopococcus	100	100	0	100	100	0	0	0	0	0	0	p__Firmicutes:c__Bacilli:o__Lactobacillales:f__Carnobacteriaceae:g__Atopococcus
Atopostipes	100	100	0	100	100	100	0	100	0	100	0	p__Firmicutes:c__Bacilli:o__Lactobacillales:f__Carnobacteriaceae:g__Atopostipes
Aurantimonas	100	65.7143	0	0	0	28.5714	0	42.8571	0	8.57143	0	p__"Proteobacteria":c__Alphaproteobacteria:o__Rhizobiales:f__"Aurantimonadaceae":g__Aurantimonas
Auraticoccus	100	100	0	100	0	100	0	0	0	100	0	p__"Actinobacteria":c__Actinobacteria:o__Actinomycetales:f__Propionibacteriaceae:g__Auraticoccus
Aureimonas	100	33.3333	0	0	0	13.3333	0	20	0	26.6667	0	p__Nitrospinae:c__Thermoflexia:o__Candidatus Brocadiales:f__Candidatus Brocadiaceae:g__Aureimonas
Aureispira	100	100	0	100	100	100	0	100	100	100	0	p__"Bacteroidetes":c__Sphingobacteriia:o__"Sphingobacteriales":f__"Saprospiraceae":g__Aureispira
Auritidibacter	100	100	0	100	0	100	0	20	0	0	0	p__"Actinobacteria":c__Actinobacteria:o__Actinomycetales:f__Micrococcaceae:g__Auritidibacter
Austwickia	100	100	0	100	0	100	0	0	0	0	0	p__"Actinobacteria":c__Actinobacteria:o__Actinomycetales:f__Dermatophilaceae:g__Austwickia
Avibacterium	100	84.6154	0	46.1538	46.1538	76.9231	0	61.5385	53.8462	53.8462	0	p__"Proteobacteria":c__Gammaproteobacteria:o__Pasteurellales:f__Pasteurellaceae:g__Avibacterium
Azoarcus	100	96.2264	0	50.9434	43.3962	79.2453	0	52.8302	33.9623	49.0566	0	p__"Proteobacteria":c__Betaproteobacteria:o__Rhodocyclales:f__Rhodocyclaceae:g__Azoarcus
Azohydromonas	100	100	0	60	40	0	0	80	0	40	0	p__"Proteobacteria":c__Betaproteobacteria:o__Burkholderiales:f__Alcaligenaceae:g__Azohydromonas
Azomonas	100	50	0	16.6667	50	50	0	0	0	0	0	p__"Proteobacteria":c__Gammaproteobacteria:o__Pseudomonadales:f__Pseudomonadaceae:g__Azomonas
Azonexus	100	100	0	33.3333	83.3333	100	0	50	0	0	0	p__"Proteobacteria":c__Betaproteobacteria:o__Rhodocyclales:f__Rhodocyclaceae:g__Azonexus
Azospira	100	91.6667	0	83.3333	91.6667	91.6667	0	91.6667	8.33333	0	0	p__"Proteobacteria":c__Betaproteobacteria:o__Rhodocyclales:f__Rhodocyclaceae:g__Azospira
Azospirillum	100	94.5455	0	3.63636	0	83.6364	0	36.8182	84.5455	70.9091	0	p__"Proteobacteria":c__Alphaproteobacteria:o__Rhodospirillales:f__Rhodospirillaceae:g__Azospirillum
Azotobacter	100	91.5493	0	23.9437	42.2535	35.2113	0	50.7042	63.3803	16.9014	0	p__"Proteobacteria":c__Gammaproteobacteria:o__Pseudomonadales:f__Pseudomonadaceae:g__Azotobacter
Azovibrio	100	100	0	100	80	0	0	100	0	0	0	p__"Proteobacteria":c__Betaproteobacteria:o__Rhodocyclales:f__Rhodocyclaceae:g__Azovibrio
Bacillus	100	94.2518	0	51.6509	22.3673	0	0	24.3355	0	39.0417	0	p__Firmicutes:c__Bacilli:o__Bacillales:f__Bacillaceae 1:g__Bacillus
Bacteriovorax	100	90.4762	0	33.3333	38.0952	61.9048	0	33.3333	0	33.3333	0	p__"Proteobacteria":c__Deltaproteobacteria:o__Bdellovibrionales:f__Bacteriovoracaceae:g__Bacteriovorax
Bacteroides	100	84.6154	0	61.5385	46.1538	80.7692	0	0	80.7692	73.0769	0	p__"Bacteroidetes":c__"Bacteroidia":o__"Bacteroidales":f__Bacteroidaceae:g__Bacteroides
Balneimonas	100	0	0	0	0	0	0	0	0	0	0	P__"Proteobacteria":C__Alphaproteobacteria:O__Rhizobiales:F__Bradyrhizobiaceae:G__Balneimonas
Balneola	100	100	0	100	100	100	0	100	100	100	0	p__"Bacteroidetes":c__Sphingobacteriia:o__"Sphingobacteriales":f__Chitinophagaceae:g__Balneola
Bartonella	100	97.9167	0	4.86111	0	95.1389	0	78.4722	0	0.694444	0	p__"Proteobacteria":c__Alphaproteobacteria:o__Rhizobiales:f__Bartonellaceae:g__Bartonella
Bauldia	100	100	0	0	0	50	0	100	0	100	0	p__"Proteobacteria":c__Alphaproteobacteria:o__Rhizobiales:f__Rhizobiales_incertae_sedis:g__Bauldia
Bdellovibrio	100	65.2174	0	39.1304	0	43.4783	0	43.4783	0	43.4783	0	p__"Proteobacteria":c__Deltaproteobacteria:o__Bdellovibrionales:f__Bdellovibrionaceae:g__Bdellovibrio
Beggiatoa	100	43.75	0	25	25	37.5	0	0	31.25	6.25	0	p__"Proteobacteria":c__Gammaproteobacteria:o__Thiotrichales:f__Thiotrichaceae:g__Beggiatoa
Beijerinckia	100	96.5517	0	0	0	75.8621	0	89.6552	0	79.3103	3.44828	p__"Proteobacteria":c__Alphaproteobacteria:o__Rhizobiales:f__Beijerinckiaceae:g__Beijerinckia
Belliella	100	100	0	100	0	100	0	0	100	0	0	p__"Bacteroidetes":c__Sphingobacteriia:o__"Sphingobacteriales":f__Cyclobacteriaceae:g__Belliella
Bellilinea	100	100	0	100	0	100	0	100	0	100	0	p__"Chloroflexi":c__Anaerolineae:o__Anaerolineales:f__Anaerolineaceae:g__Bellilinea
Belnapia	100	100	0	66.6667	0	66.6667	0	100	0	100	0	p__"Proteobacteria":c__Alphaproteobacteria:o__Rhodospirillales:f__Acetobacteraceae:g__Belnapia
Bergeriella	100	100	0	100	75	100	0	0	0	0	0	p__"Proteobacteria":c__Betaproteobacteria:o__Neisseriales:f__Neisseriaceae:g__Bergeriella
Bermanella	100	100	0	0	100	100	0	0	0	100	0	p__"Proteobacteria":c__Gammaproteobacteria:o__Oceanospirillales:f__Oceanospirillaceae:g__Bermanella
Bhargavaea	100	100	0	93.75	43.75	0	0	68.75	0	0	0	p__Firmicutes:c__Erysipelotrichia:o__Erysipelotrichales:f__Bacillales_incertae_sedis:g__Bhargavaea
Bibersteinia	100	7.40741	0	0	100	0	0	14.8148	0	100	0	p__"Proteobacteria":c__Gammaproteobacteria:o__Pasteurellales:f__Pasteurellaceae:g__Bibersteinia
Bifidobacterium	100	99.7305	0	86.2534	21.2938	97.3046	0	50.4043	68.1941	89.7574	4.31267	p__"Actinobacteria":c__Actinobacteria:o__Bifidobacteriales:f__Bifidobacteriaceae:g__Bifidobacterium
Bilophila	100	100	0	100	100	100	0	50	100	100	0	p__"Proteobacteria":c__Deltaproteobacteria:o__Desulfovibrionales:f__Desulfovibrionaceae:g__Bilophila
Bizionia	100	85.7143	0	50	42.8571	28.5714	0	0	57.1429	0	0	p__"Bacteroidetes":c__Flavobacteriia:o__"Flavobacteriales":f__Flavobacteriaceae:g__Bizionia
Blastochloris	100	100	0	0	0	93.3333	0	60	0	93.3333	0	p__"Proteobacteria":c__Alphaproteobacteria:o__Rhizobiales:f__Hyphomicrobiaceae:g__Blastochloris
Blastomonas	100	90	0	0	0	80	0	60	0	90	0	p__"Proteobacteria":c__Alphaproteobacteria:o__Sphingomonadales:f__Sphingomonadaceae:g__Blastomonas
Blastopirellula	100	100	0	33.3333	0	66.6667	0	100	33.3333	66.6667	0	p__"Planctomycetes":c__Planctomycetia:o__Planctomycetales:f__Planctomycetaceae:g__Blastopirellula
Blautia	100	77.2727	0	50	0	72.7273	0	9.09091	27.2727	50	0	p__Firmicutes:c__Erysipelotrichia:o__Erysipelotrichales:f__Bacillales_incertae_sedis:g__Blautia
Bogoriella	100	100	0	100	0	0	0	100	0	0	0	p__"Actinobacteria":c__Actinobacteria:o__Actinomycetales:f__Bogoriellaceae:g__Bogoriella
Bordetella	100	94.5736	0	89.1473	69.7674	67.4419	0	75.1938	0	0	0	p__"Proteobacteria":c__Betaproteobacteria:o__Burkholderiales:f__Alcaligenaceae:g__Bordetella
Borrelia	100	100	0	99.5833	99.5833	99.1667	0	95	96.6667	99.5833	0	p__"Spirochaetes":c__Spirochaetia:o__Spirochaetales:f__Spirochaetaceae:g__Borrelia
Bosea	100	96.2264	0	0	0	96.2264	0	83.0189	81.1321	39.6226	0	p__"Proteobacteria":c__Alphaproteobacteria:o__Rhizobiales:f__Bradyrhizobiaceae:g__Bosea
Bowmanella	100	100	0	66.6667	33.3333	66.6667	0	66.6667	0	100	0	p__"Proteobacteria":c__Gammaproteobacteria:o__Alteromonadales:f__Alteromonadaceae:g__Bowmanella
Brachybacterium	100	100	0	55.9524	0	90.4762	0	0	0	64.2857	0	p__"Actinobacteria":c__Actinobacteria:o__Actinomycetales:f__Dermabacteraceae:g__Brachybacterium
Brachymonas	100	100	0	28.5714	14.2857	42.8571	0	14.2857	0	57.1429	0	p__"Proteobacteria":c__Betaproteobacteria:o__Burkholderiales:f__Comamonadaceae:g__Brachymonas
Brachyspira	100	100	0	100	0	100	0	100	100	100	0	p__"Spirochaetes":c__Spirochaetia:o__Spirochaetales:f__"Brachyspiraceae":g__Brachyspira
Brackiella	100	100	0	100	100	100	0	100	0	100	0	p__"Proteobacteria":c__Betaproteobacteria:o__Burkholderiales:f__Alcaligenaceae:g__Brackiella
Bradyrhizobium	100	98.8526	0	0	0	88.173	0	29.8323	95.7635	75.0221	0	p__"Proteobacteria":c__Alphaproteobacteria:o__Rhizobiales:f__Bradyrhizobiaceae:g__Bradyrhizobium
Branchiibius	100	100	0	100	0	0	0	0	0	100	100	p__"Actinobacteria":c__Actinobacteria:o__Actinomycetales:f__Dermacoccaceae:g__Branchiibius
Brassicibacter	100	100	0	100	0	100	0	100	0	100	0	p__Nitrospinae:c__Thermoflexia:o__Candidatus Brocadiales:f__Candidatus Brocadiaceae:g__Brassicibacter
Brenneria	100	92.8571	0	0	57.1429	0	0	0	0	14.2857	0	p__"Proteobacteria":c__Gammaproteobacteria:o__"Enterobacteriales":f__Enterobacteriaceae:g__Brenneria
Brevibacillus	100	98.9547	0	83.6237	80.8362	96.5157	0	73.5192	95.122	97.2125	0	p__Firmicutes:c__Bacilli:o__Bacillales:f__Paenibacillaceae 1:g__Brevibacillus
Brevibacterium	100	7.69231	0	0	0	7.69231	0	7.69231	7.69231	7.69231	0	p__"Actinobacteria":c__Actinobacteria:o__Actinomycetales:f__Brevibacteriaceae:g__Brevibacterium
Brevundimonas	100	98.6971	0	0	0	63.1922	0	81.4332	94.4625	0	0	p__"Proteobacteria":c__Alphaproteobacteria:o__Caulobacterales:f__Caulobacteraceae:g__Brevundimonas
Brochothrix	100	100	0	100	100	0	0	0	8.33333	91.6667	0	p__Firmicutes:c__Bacilli:o__Bacillales:f__Listeriaceae:g__Brochothrix
Brooklawnia	100	50	0	50	0	50	0	0	0	50	0	p__"Actinobacteria":c__Actinobacteria:o__Actinomycetales:f__Propionibacteriaceae:g__Brooklawnia
Brucella	100	93.0909	0	0	0	0	0	93.8182	0	0	0	p__"Proteobacteria":c__Alphaproteobacteria:o__Rhizobiales:f__Brucellaceae:g__Brucella
Brumimicrobium	100	100	0	100	100	100	0	0	100	100	0	p__"Bacteroidetes":c__Flavobacteriia:o__"Flavobacteriales":f__Cryomorphaceae:g__Brumimicrobium
Buchnera	100	98.3193	0	32.7731	27.7311	32.7731	0	21.8487	39.4958	47.0588	1.68067	p__Nitrospinae:c__Fimbriimonadia:o__Magnetococcales:f__SAR11:g__Buchnera
Budvicia	100	100	0	100	33.3333	0	0	33.3333	0	100	0	p__"Proteobacteria":c__Gammaproteobacteria:o__"Enterobacteriales":f__Enterobacteriaceae:g__Budvicia
Bulleidia	100	20	0	20	20	20	0	0	0	20	0	p__Firmicutes:c__Erysipelotrichia:o__Erysipelotrichales:f__Erysipelotrichaceae:g__Bulleidia
Burkholderia	100	96.5385	0	55.1923	23.8462	82.6923	0	19.4231	72.3077	0.192308	0	p__"Proteobacteria":c__Betaproteobacteria:o__Burkholderiales:f__Burkholderiaceae:g__Burkholderia
Buttiauxella	100	100	0	0	55.5556	0	0	0	0	0	0	p__"Proteobacteria":c__Gammaproteobacteria:o__"Enterobacteriales":f__Enterobacteriaceae:g__Buttiauxella
Butyricicoccus	100	100	0	100	0	100	0	0	100	100	0	p__Firmicutes:c__Erysipelotrichia:o__Erysipelotrichales:f__Bacillales_incertae_sedis:g__Butyricicoccus
Butyricimonas	100	100	0	100	100	100	0	100	100	100	0	p__"Bacteroidetes":c__"Bacteroidia":o__"Bacteroidales":f__"Porphyromonadaceae":g__Butyricimonas
Butyrivibrio	100	47.2727	0	5.45455	9.09091	43.6364	0	3.63636	45.4545	0	0	p__Firmicutes:c__Clostridia:o__Clostridiales:f__Lachnospiraceae:g__Butyrivibrio
Byssovorax	100	100	0	100	100	100	0	100	0	100	0	p__"Proteobacteria":c__Deltaproteobacteria:o__Myxococcales:f__Polyangiaceae:g__Byssovorax
Caedibacter	100	100	0	50	25	100	0	100	25	100	0	p__"Proteobacteria":c__Gammaproteobacteria:o__Thiotrichales:f__Thiotrichales_incertae_sedis:g__Caedibacter
Caenimonas	100	100	0	0	50	0	0	0	0	100	0	p__"Proteobacteria":c__Betaproteobacteria:o__Burkholderiales:f__Comamonadaceae:g__Caenimonas
Caenispirillum	100	100	0	0	0	100	0	66.6667	0	100	0	p__"Proteobacteria":c__Alphaproteobacteria:o__Rhodospirillales:f__Rhodospirillaceae:g__Caenispirillum
Caldalkalibacillus	100	100	0	100	100	100	0	100	0	0	0	p__Firmicutes:c__Erysipelotrichia:o__Erysipelotrichales:f__Bacillales_incertae_sedis:g__Caldalkalibacillus
Caldanaerobacter	100	88.8889	0	77.7778	11.1111	88.8889	0	33.3333	88.8889	66.6667	0	p__Firmicutes:c__Clostridia:o__Thermoanaerobacterales:f__Thermoanaerobacteraceae:g__Caldanaerobacter
Caldanaerobius	100	100	0	100	0	100	0	100	0	100	0	p__Firmicutes:c__Erysipelotrichia:o__Natranaerobiales:f__Natranaerobiaceae:g__Caldanaerobius
Caldicoprobacter	100	100	0	100	0	100	0	66.6667	66.6667	66.6667	0	p__Firmicutes:c__Clostridia:o__Clostridiales:f__Clostridiales_Incertae Sedis IV:g__Caldicoprobacter
Caldilinea	100	100	0	100	0	100	0	0	0	100	0	p__"Chloroflexi":c__Caldilineae:o__Caldilineales:f__Caldilineaceae:g__Caldilinea
Caldimonas	100	100	0	0	100	0	0	100	0	0	0	p__"Proteobacteria":c__Betaproteobacteria:o__Burkholderiales:f__Comamonadaceae:g__Caldimonas
Caldisericum	100	100	0	100	100	100	0	100	100	100	0	p__"Caldiserica":c__Caldisericia:o__Caldisericales:f__Caldisericaceae:g__Caldisericum
Calditerricola	100	100	0	100	100	100	0	100	20	0	0	p__Firmicutes:c__Erysipelotrichia:o__Erysipelotrichales:f__Bacillales_incertae_sedis:g__Calditerricola
Calditerrivibrio	100	100	0	100	100	100	0	100	100	0	0	p__"Deferribacteres":c__Deferribacteres:o__Deferribacterales:f__Deferribacteraceae:g__Calditerrivibrio
Caldithrix	100	100	0	100	100	100	0	100	100	100	0	p__"Deferribacteres":c__Deferribacteres:o__Deferribacterales:f__Deferribacterales_incertae_sedis:g__Caldithrix
Caloramator	100	92.3077	0	23.0769	0	84.6154	0	26.9231	15.3846	26.9231	0	p__Firmicutes:c__Clostridia:o__Clostridiales:f__Clostridiaceae 1:g__Caloramator
Caloranaerobacter	100	100	0	100	0	100	0	100	50	0	0	p__Firmicutes:c__Clostridia:o__Clostridiales:f__Clostridiaceae 3:g__Caloranaerobacter
Caloribacterium	100	100	0	100	0	100	0	100	100	100	0	p__Nitrospinae:c__Fimbriimonadia:o__Fimbriimonadales:f__Fimbriimonadaceae:g__Caloribacterium
Camelimonas	100	100	0	0	0	50	0	100	100	100	0	p__"Proteobacteria":c__Alphaproteobacteria:o__Rhizobiales:f__Beijerinckiaceae:g__Camelimonas
Caminibacter	100	100	0	100	0	100	0	100	100	100	0	p__"Proteobacteria":c__Epsilonproteobacteria:o__Nautiliales:f__Nautiliaceae:g__Caminibacter
Caminicella	100	100	0	100	0	100	0	100	100	100	0	p__Firmicutes:c__Clostridia:o__Clostridiales:f__Clostridiaceae 4:g__Caminicella
Campylobacter	100	99.7396	0	94.2708	0	98.6979	0	94.0104	87.5	96.6146	0	p__"Proteobacteria":c__Epsilonproteobacteria:o__Campylobacterales:f__Campylobacteraceae:g__Campylobacter
Candidimonas	100	100	0	0	100	0	0	100	0	0	0	p__Nitrospinae:c__Fimbriimonadia:o__Magnetococcales:f__SAR11:g__Candidimonas
Capnocytophaga	100	94.4444	0	77.7778	11.1111	88.8889	0	0	30.5556	77.7778	0	p__"Bacteroidetes":c__Flavobacteriia:o__"Flavobacteriales":f__Flavobacteriaceae:g__Capnocytophaga
Carboxydocella	100	100	0	66.6667	66.6667	100	0	33.3333	33.3333	0	0	p__Firmicutes:c__Clostridia:o__Clostridiales:f__Clostridiales_Incertae Sedis XVI:g__Carboxydocella
Carboxydothermus	100	100	0	50	50	50	0	50	50	50	0	p__Firmicutes:c__Clostridia:o__Thermoanaerobacterales:f__Thermoanaerobacteraceae:g__Carboxydothermus
Cardiobacterium	100	75	0	58.3333	8.33333	25	0	0	50	58.3333	0	p__"Proteobacteria":c__Gammaproteobacteria:o__Cardiobacteriales:f__Cardiobacteriaceae:g__Cardiobacterium
Carnimonas	100	100	0	0	100	0	0	0	0	100	0	p__"Proteobacteria":c__Gammaproteobacteria:o__Oceanospirillales:f__Halomonadaceae:g__Carnimonas
Carnobacterium	100	98.6842	0	97.3684	92.1053	26.3158	0	0	44.7368	96.0526	0	p__Firmicutes:c__Bacilli:o__Lactobacillales:f__Carnobacteriaceae:g__Carnobacterium
Caryophanon	100	55.5556	0	55.5556	33.3333	0	0	33.3333	0	44.4444	0	p__Firmicutes:c__Bacilli:o__Bacillales:f__Planococcaceae:g__Caryophanon
Castellaniella	100	100	0	88.4615	61.5385	100	0	0	0	100	0	p__"Proteobacteria":c__Betaproteobacteria:o__Burkholderiales:f__Alcaligenaceae:g__Castellaniella
Catellibacterium	100	25	0	0	0	0	0	0	0	0	0	p__"Proteobacteria":c__Alphaproteobacteria:o__Rhodobacterales:f__Rhodobacteraceae:g__Catellibacterium
Catellicoccus	100	100	0	100	100	0	0	0	0	100	0	p__Firmicutes:c__Bacilli:o__Lactobacillales:f__Carnobacteriaceae:g__Catellicoccus
Catenibacterium	100	100	0	100	100	100	0	0	100	0	0	p__Firmicutes:c__Erysipelotrichia:o__Erysipelotrichales:f__Erysipelotrichaceae:g__Catenibacterium
Catenovulum	100	100	0	50	0	50	0	0	0	50	0	p__Nitrospinae:c__Fimbriimonadia:o__Fimbriimonadales:f__Defluviitaleaceae:g__Catenovulum
Catonella	100	100	0	8.33333	0	16.6667	0	8.33333	8.33333	0	0	p__Firmicutes:c__Clostridia:o__Clostridiales:f__Lachnospiraceae:g__Catonella
Caulobacter	100	80.8511	0	0	0	74.4681	0	45.7447	70.2128	70.2128	0	p__"Proteobacteria":c__Alphaproteobacteria:o__Caulobacterales:f__Caulobacteraceae:g__Caulobacter
Celeribacter	100	20	0	0	0	0	0	0	60	0	0	p__"Proteobacteria":c__Alphaproteobacteria:o__Rhodobacterales:f__Rhodobacteraceae:g__Celeribacter
Cellulomonas	100	78.4	0	39.2	0	52.8	0	0	0	0	0	p__"Actinobacteria":c__Actinobacteria:o__Actinomycetales:f__Cellulomonadaceae:g__Cellulomonas
Cellulophaga	100	96.2264	0	50.9434	0	45.283	0	0	1.88679	18.8679	0	p__"Bacteroidetes":c__Flavobacteriia:o__"Flavobacteriales":f__Flavobacteriaceae:g__Cellulophaga
Cellulosilyticum	100	7.14286	0	7.14286	0	7.14286	0	7.14286	7.14286	7.14286	0	p__Firmicutes:c__Erysipelotrichia:o__Erysipelotrichales:f__Bacillales_incertae_sedis:g__Cellulosilyticum
Cellulosimicrobium	100	94.0299	0	29.8507	0	91.0448	0	0	0	0	0	p__"Actinobacteria":c__Actinobacteria:o__Actinomycetales:f__Promicromonosporaceae:g__Cellulosimicrobium
Cellvibrio	100	96	0	72	64	96	0	0	0	60	0	p__"Proteobacteria":c__Gammaproteobacteria:o__Pseudomonadales:f__Pseudomonadaceae:g__Cellvibrio
Centipeda	100	50	0	50	0	0	0	50	100	50	0	p__Firmicutes:c__Clostridia:o__Clostridiales:f__Veillonellaceae:g__Centipeda
Cerasibacillus	100	100	0	100	0	0	0	100	0	100	0	p__Firmicutes:c__Bacilli:o__Bacillales:f__Bacillaceae 2:g__Cerasibacillus
Cerasicoccus	100	100	0	100	100	100	0	100	25	25	0	p__"Verrucomicrobia":c__Opitutae:o__Puniceicoccales:f__Puniceicoccaceae:g__Cerasicoccus
Cetobacterium	100	100	0	100	0	100	0	100	100	100	0	p__"Fusobacteria":c__Fusobacteriia:o__"Fusobacteriales":f__"Fusobacteriaceae":g__Cetobacterium
Chelatococcus	100	90	0	0	0	65	0	35	0	0	0	p__"Proteobacteria":c__Alphaproteobacteria:o__Rhizobiales:f__Beijerinckiaceae:g__Chelatococcus
Chitinibacter	100	100	0	100	100	100	0	0	0	100	0	p__"Proteobacteria":c__Betaproteobacteria:o__Neisseriales:f__Neisseriaceae:g__Chitinibacter
Chitinilyticum	100	100	0	100	0	100	0	0	0	0	0	p__"Proteobacteria":c__Betaproteobacteria:o__Neisseriales:f__Neisseriaceae:g__Chitinilyticum
Chitinimonas	100	100	0	83.3333	83.3333	83.3333	0	83.3333	0	0	0	p__"Proteobacteria":c__Betaproteobacteria:o__Burkholderiales:f__Burkholderiaceae:g__Chitinimonas
Chitiniphilus	100	0	0	0	0	0	0	0	0	0	0	p__"Proteobacteria":c__Betaproteobacteria:o__Neisseriales:f__Neisseriaceae:g__Chitiniphilus
Chitinivibrio	100	100	0	0	100	100	0	100	0	100	0	p__Nitrospinae:c__Chitinivibrionia:o__Chitinivibrionales:f__Chitinivibrionaceae:g__Chitinivibrio
Chlamydophila	100	100	0	100	100	100	0	93.617	4.25532	97.8723	0	p__"Chlamydiae":c__Chlamydiia:o__Chlamydiales:f__Chlamydiaceae:g__Chlamydophila
Chlorobium	100	42.8571	0	28.5714	0	28.5714	0	0	28.5714	14.2857	0	p__"Chlorobi":c__"Chlorobia":o__Chlorobiales:f__Chlorobiaceae:g__Chlorobium
Chloroflexus	100	100	0	27.2727	0	100	0	0	0	81.8182	0	p__"Chloroflexi":c__Chloroflexia:o__"Chloroflexales":f__Chloroflexaceae:g__Chloroflexus
Chondromyces	100	58.3333	0	58.3333	41.6667	41.6667	0	33.3333	0	25	0	p__"Proteobacteria":c__Deltaproteobacteria:o__Myxococcales:f__Polyangiaceae:g__Chondromyces
Chromatium	100	20	0	20	20	20	0	20	0	0	0	p__"Proteobacteria":c__Gammaproteobacteria:o__Chromatiales:f__Chromatiaceae:g__Chromatium
Chromobacterium	100	98.5714	0	95.7143	94.2857	95.7143	0	40	0	0	0	p__"Proteobacteria":c__Betaproteobacteria:o__Neisseriales:f__Neisseriaceae:g__Chromobacterium
Chromohalobacter	100	87.037	0	83.3333	79.6296	81.4815	0	87.037	79.6296	29.6296	1.85185	p__"Proteobacteria":c__Gammaproteobacteria:o__Oceanospirillales:f__Halomonadaceae:g__Chromohalobacter
Chryseobacterium	100	97.5	0	69.375	63.125	91.875	0	0	12.5	50	0	p__"Bacteroidetes":c__Flavobacteriia:o__"Flavobacteriales":f__Flavobacteriaceae:g__Chryseobacterium
Chryseoglobus	100	100	0	100	0	0	0	0	0	0	0	p__"Actinobacteria":c__Actinobacteria:o__Actinomycetales:f__Microbacteriaceae:g__Chryseoglobus
Chryseomicrobium	100	100	0	50	75	0	0	75	0	100	0	p__Nitrospinae:c__Fimbriimonadia:o__Fimbriimonadales:f__Defluviitaleaceae:g__Chryseomicrobium
Chrysiogenes	100	100	0	100	100	0	0	100	0	100	0	p__"Chrysiogenetes":c__Chrysiogenetes:o__Chrysiogenales:f__Chrysiogenaceae:g__Chrysiogenes
Citreicella	100	75	0	0	0	75	0	0	75	0	0	p__"Proteobacteria":c__Alphaproteobacteria:o__Rhodobacterales:f__Rhodobacteraceae:g__Citreicella
Citreimonas	100	100	0	0	0	0	0	0	0	0	0	p__"Proteobacteria":c__Alphaproteobacteria:o__Rhodobacterales:f__Rhodobacteraceae:g__Citreimonas
Citricoccus	100	66.6667	0	61.9048	0	4.7619	0	61.9048	0	0	0	p__"Actinobacteria":c__Actinobacteria:o__Actinomycetales:f__Micrococcaceae:g__Citricoccus
Citrobacter	100	78.392	0	0	4.52261	0	0	0	0	0	0	p__"Proteobacteria":c__Gammaproteobacteria:o__"Enterobacteriales":f__Enterobacteriaceae:g__Citrobacter
Clavibacter	100	97.8723	0	95.7447	0	97.8723	0	0	2.12766	0	0	p__"Actinobacteria":c__Actinobacteria:o__Actinomycetales:f__Microbacteriaceae:g__Clavibacter
Cloacibacillus	100	100	0	0	0	100	0	0	100	0	0	p__"Synergistetes":c__Synergistia:o__Synergistales:f__Synergistaceae:g__Cloacibacillus
Cobetia	100	100	0	0	97.2973	97.2973	0	0	0	97.2973	0	p__"Proteobacteria":c__Gammaproteobacteria:o__Oceanospirillales:f__Halomonadaceae:g__Cobetia
Coenonia	100	100	0	100	0	100	0	0	100	50	0	p__"Bacteroidetes":c__Flavobacteriia:o__"Flavobacteriales":f__Flavobacteriaceae:g__Coenonia
Cohaesibacter	100	100	0	0	0	0	0	50	0	100	0	p__"Proteobacteria":c__Alphaproteobacteria:o__Rhizobiales:f__Cohaesibacteraceae:g__Cohaesibacter
Cohnella	100	97.2973	0	51.3514	62.1622	97.2973	0	32.4324	2.7027	51.3514	0	p__Firmicutes:c__Bacilli:o__Bacillales:f__Paenibacillaceae 1:g__Cohnella
Collimonas	100	97.561	0	48.7805	12.1951	53.6585	0	70.7317	0	0	0	p__"Proteobacteria":c__Betaproteobacteria:o__Burkholderiales:f__Oxalobacteraceae:g__Collimonas
Collinsella	100	100	0	100	0	100	0	0	100	0	0	p__"Actinobacteria":c__Actinobacteria:o__Coriobacteriales:f__Coriobacteriaceae:g__Collinsella
Colwellia	100	99.2	0	53.6	8	79.2	0	85.6	88	88	0	p__"Proteobacteria":c__Gammaproteobacteria:o__Alteromonadales:f__Colwelliaceae:g__Colwellia
Comamonas	100	90.0498	0	63.1841	56.7164	40.2985	0	0.497512	0	0	0	p__"Proteobacteria":c__Betaproteobacteria:o__Burkholderiales:f__Comamonadaceae:g__Comamonas
Conchiformibius	100	100	0	64.2857	42.8571	0	0	57.1429	100	21.4286	0	p__"Proteobacteria":c__Betaproteobacteria:o__Neisseriales:f__Neisseriaceae:g__Conchiformibius
Coprobacillus	100	100	0	100	100	100	0	0	0	66.6667	0	p__Firmicutes:c__Erysipelotrichia:o__Erysipelotrichales:f__Erysipelotrichaceae:g__Coprobacillus
Coprococcus	100	100	0	33.3333	0	100	0	66.6667	66.6667	66.6667	0	p__Firmicutes:c__Clostridia:o__Clostridiales:f__Lachnospiraceae:g__Coprococcus
Coprothermobacter	100	87.5	0	87.5	0	87.5	0	25	87.5	87.5	0	p__Firmicutes:c__Clostridia:o__Thermoanaerobacterales:f__Thermodesulfobiaceae:g__Coprothermobacter
Coraliomargarita	100	100	0	100	100	100	0	100	100	100	0	p__"Verrucomicrobia":c__Opitutae:o__Puniceicoccales:f__Puniceicoccaceae:g__Coraliomargarita
Corallibacter	100	100	0	100	0	0	0	0	0	0	0	p__Nitrospinae:c__Fimbriimonadia:o__Fimbriimonadales:f__Defluviitaleaceae:g__Corallibacter
Corallococcus	100	85.2941	0	27.9412	50	75	0	76.4706	0	75	0	p__"Proteobacteria":c__Deltaproteobacteria:o__Myxococcales:f__Myxococcaceae:g__Corallococcus
Coriobacterium	100	100	0	100	0	100	0	0	100	0	0	p__"Actinobacteria":c__Actinobacteria:o__Coriobacteriales:f__Coriobacteriaceae:g__Coriobacterium
Corynebacterium	100	99.2224	0	54.4323	0	94.7123	0	4.04355	60.1866	7.93157	0	p__"Actinobacteria":c__Actinobacteria:o__Actinomycetales:f__Corynebacteriaceae:g__Corynebacterium
Costertonia	100	100	0	100	100	100	0	0	0	100	0	p__"Bacteroidetes":c__Flavobacteriia:o__"Flavobacteriales":f__Flavobacteriaceae:g__Costertonia
Coxiella	100	100	0	0	0	0	0	0	0	0	0	p__"Proteobacteria":c__Gammaproteobacteria:o__Legionellales:f__Coxiellaceae:g__Coxiella
Craurococcus	100	100	0	100	0	100	0	100	100	100	0	p__"Proteobacteria":c__Alphaproteobacteria:o__Rhodospirillales:f__Acetobacteraceae:g__Craurococcus
Croceibacter	100	100	0	100	0	100	0	0	0	100	0	p__"Bacteroidetes":c__Flavobacteriia:o__"Flavobacteriales":f__Flavobacteriaceae:g__Croceibacter
Croceicoccus	100	50	0	0	0	50	0	0	0	50	0	p__"Proteobacteria":c__Alphaproteobacteria:o__Sphingomonadales:f__Erythrobacteraceae:g__Croceicoccus
Crocinitomix	100	100	0	100	100	100	0	0	100	100	0	p__"Bacteroidetes":c__Flavobacteriia:o__"Flavobacteriales":f__Cryomorphaceae:g__Crocinitomix
Cronobacter	100	98.8131	0	0	0	0	0	0	0	0	0	p__"Proteobacteria":c__Gammaproteobacteria:o__"Enterobacteriales":f__Enterobacteriaceae:g__Cronobacter
Cruoricaptor	100	100	0	100	100	100	0	0	100	100	0	p__Nitrospinae:c__Fimbriimonadia:o__Fimbriimonadales:f__Fimbriimonadaceae:g__Cruoricaptor
Cryobacterium	100	97.561	0	58.5366	46.3415	0	0	0	0	0	0	p__"Actinobacteria":c__Actinobacteria:o__Actinomycetales:f__Microbacteriaceae:g__Cryobacterium
Cryptanaerobacter	100	100	0	100	0	100	0	100	100	100	0	p__Firmicutes:c__Clostridia:o__Clostridiales:f__Peptococcaceae 2:g__Cryptanaerobacter
Cryptobacterium	100	100	0	100	0	100	0	0	0	100	0	p__"Actinobacteria":c__Actinobacteria:o__Coriobacteriales:f__Coriobacteriaceae:g__Cryptobacterium
Cryptosporangium	100	100	0	100	0	100	0	0	100	0	0	p__"Actinobacteria":c__Actinobacteria:o__Actinomycetales:f__Cryptosporangiaceae:g__Cryptosporangium
Cupriavidus	100	100	0	70.6806	41.3613	91.0995	0	20.9424	0.52356	91.0995	0	p__"Proteobacteria":c__Betaproteobacteria:o__Burkholderiales:f__Burkholderiaceae:g__Cupriavidus
Curtobacterium	100	94.382	0	78.0899	0	0	0	0	0	0	0	p__"Actinobacteria":c__Actinobacteria:o__Actinomycetales:f__Microbacteriaceae:g__Curtobacterium
Curvibacter	100	93.3333	0	80	73.3333	0	0	40	0	0	0	p__"Proteobacteria":c__Betaproteobacteria:o__Burkholderiales:f__Comamonadaceae:g__Curvibacter
Cyclobacterium	100	100	0	100	0	50	0	0	100	100	0	p__"Bacteroidetes":c__Sphingobacteriia:o__"Sphingobacteriales":f__Cyclobacteriaceae:g__Cyclobacterium
Cycloclasticus	100	100	0	85.7143	95.2381	95.2381	0	0	0	100	0	p__"Proteobacteria":c__Gammaproteobacteria:o__Thiotrichales:f__Piscirickettsiaceae:g__Cycloclasticus
Cystobacter	100	100	0	69.697	51.5152	60.6061	0	57.5758	57.5758	63.6364	0	p__"Proteobacteria":c__Deltaproteobacteria:o__Myxococcales:f__Cystobacteraceae:g__Cystobacter
Daeguia	100	100	0	0	0	0	0	0	0	0	0	p__"Proteobacteria":c__Alphaproteobacteria:o__Rhizobiales:f__Brucellaceae:g__Daeguia
Dasania	100	100	0	50	100	100	0	50	0	50	0	p__"Proteobacteria":c__Gammaproteobacteria:o__Pseudomonadales:f__Pseudomonadales_incertae_sedis:g__Dasania
Dechloromonas	100	73.6842	0	94.7368	36.8421	15.7895	0	47.3684	68.4211	0	0	p__"Proteobacteria":c__Betaproteobacteria:o__Rhodocyclales:f__Rhodocyclaceae:g__Dechloromonas
Deefgea	100	100	0	33.3333	83.3333	100	0	33.3333	0	0	0	p__"Proteobacteria":c__Betaproteobacteria:o__Neisseriales:f__Neisseriaceae:g__Deefgea
Deferribacter	100	100	0	100	100	100	0	100	100	100	33.3333	p__"Deferribacteres":c__Deferribacteres:o__Deferribacterales:f__Deferribacteraceae:g__Deferribacter
Defluviicoccus	100	100	0	100	0	100	0	100	0	100	0	p__"Proteobacteria":c__Alphaproteobacteria:o__Rhodospirillales:f__Rhodospirillaceae:g__Defluviicoccus
Defluviitalea	100	100	0	50	0	100	0	0	50	50	0	p__Nitrospinae:c__Fimbriimonadia:o__Fimbriimonadales:f__Defluviitaleaceae:g__Defluviitalea
Dehalobacter	100	100	0	100	66.6667	0	0	90.4762	95.2381	0	0	p__Firmicutes:c__Clostridia:o__Clostridiales:f__Peptococcaceae 1:g__Dehalobacter
Dehalococcoides	100	92	0	16	0	92	0	28	0	88	0	p__Nitrospinae:c__Dehalococcoidia:o__Dehalococcoidales:f__Dehalococcoidaceae:g__Dehalococcoides
Deinobacterium	100	100	0	100	100	100	0	100	100	100	0	p__"Deinococcus-Thermus":c__Deinococci:o__Deinococcales:f__Deinococcaceae:g__Deinobacterium
Deinococcus	100	98.5816	0	70.922	75.1773	92.1986	0	7.80142	19.8582	67.3759	0	p__"Deinococcus-Thermus":c__Deinococci:o__Deinococcales:f__Deinococcaceae:g__Deinococcus
Delftia	100	98.9583	0	95.8333	94.7917	0	0	96.875	0	0	0	p__"Proteobacteria":c__Betaproteobacteria:o__Burkholderiales:f__Comamonadaceae:g__Delftia
Demequina	100	100	0	80	0	53.3333	0	0	0	0	0	p__"Actinobacteria":c__Actinobacteria:o__Actinomycetales:f__Demequinaceae:g__Demequina
Demetria	100	100	0	100	0	0	0	0	0	0	0	p__"Actinobacteria":c__Actinobacteria:o__Actinomycetales:f__Dermacoccaceae:g__Demetria
Dendrosporobacter	100	100	0	100	100	100	0	100	0	100	0	p__Firmicutes:c__Clostridia:o__Clostridiales:f__Veillonellaceae:g__Dendrosporobacter
Denitratisoma	100	50	0	0	50	50	0	50	0	0	0	p__"Proteobacteria":c__Betaproteobacteria:o__Rhodocyclales:f__Rhodocyclaceae:g__Denitratisoma
Denitrobacterium	100	80	0	80	0	80	0	0	0	80	0	p__"Actinobacteria":c__Actinobacteria:o__Coriobacteriales:f__Coriobacteriaceae:g__Denitrobacterium
Denitrovibrio	100	100	0	100	100	100	0	100	100	100	0	p__"Deferribacteres":c__Deferribacteres:o__Deferribacterales:f__Deferribacteraceae:g__Denitrovibrio
Dermabacter	100	75	0	12.5	0	50	0	0	0	0	0	p__"Actinobacteria":c__Actinobacteria:o__Actinomycetales:f__Dermabacteraceae:g__Dermabacter
Dermacoccus	100	90.9091	0	59.0909	0	81.8182	0	0	0	50	0	p__"Actinobacteria":c__Actinobacteria:o__Actinomycetales:f__Dermacoccaceae:g__Dermacoccus
Dermatophilus	100	80	0	80	0	0	0	0	0	0	0	p__"Actinobacteria":c__Actinobacteria:o__Actinomycetales:f__Dermatophilaceae:g__Dermatophilus
Derxia	100	100	0	75	50	100	0	100	0	0	0	p__"Proteobacteria":c__Betaproteobacteria:o__Burkholderiales:f__Alcaligenaceae:g__Derxia
Desemzia	100	100	0	75	0	50	0	0	0	0	0	p__Firmicutes:c__Bacilli:o__Lactobacillales:f__Carnobacteriaceae:g__Desemzia
Desulfacinum	100	100	0	100	100	100	0	50	50	0	0	p__"Proteobacteria":c__Deltaproteobacteria:o__Syntrophobacterales:f__Syntrophobacteraceae:g__Desulfacinum
Desulfarculus	100	100	0	100	100	100	0	0	100	100	0	p__"Proteobacteria":c__Deltaproteobacteria:o__Desulfarculales:f__Desulfarculaceae:g__Desulfarculus
Desulfatibacillum	100	100	0	100	100	100	0	100	100	100	0	p__"Proteobacteria":c__Deltaproteobacteria:o__Desulfobacterales:f__Desulfobacteraceae:g__Desulfatibacillum
Desulfatiferula	100	100	0	100	100	100	0	100	0	100	0	p__"Proteobacteria":c__Deltaproteobacteria:o__Desulfobacterales:f__Desulfobacteraceae:g__Desulfatiferula
Desulfatitalea	100	100	0	100	100	100	0	33.3333	100	66.6667	0	p__Nitrospinae:c__Fimbriimonadia:o__Fimbriimonadales:f__Defluviitaleaceae:g__Desulfatitalea
Desulfitobacterium	100	100	15	72.5	90	97.5	0	60	57.5	42.5	0	p__Firmicutes:c__Clostridia:o__Clostridiales:f__Peptococcaceae 1:g__Desulfitobacterium
Desulfobacca	100	100	0	100	100	100	0	100	0	0	0	p__"Proteobacteria":c__Deltaproteobacteria:o__Syntrophobacterales:f__Syntrophaceae:g__Desulfobacca
Desulfobacter	100	100	0	93.3333	80	100	0	73.3333	40	86.6667	6.66667	p__"Proteobacteria":c__Deltaproteobacteria:o__Desulfobacterales:f__Desulfobacteraceae:g__Desulfobacter
Desulfobacterium	100	100	0	62.5	37.5	81.25	0	31.25	37.5	56.25	0	p__"Proteobacteria":c__Deltaproteobacteria:o__Desulfobacterales:f__Desulfobacteraceae:g__Desulfobacterium
Desulfobacula	100	100	0	71.4286	100	100	0	85.7143	100	100	0	p__"Proteobacteria":c__Deltaproteobacteria:o__Desulfobacterales:f__Desulfobacteraceae:g__Desulfobacula
Desulfobotulus	100	100	0	100	100	100	0	100	100	100	0	p__"Proteobacteria":c__Deltaproteobacteria:o__Desulfobacterales:f__Desulfobacteraceae:g__Desulfobotulus
Desulfobulbus	100	100	0	53.8462	53.8462	69.2308	0	61.5385	61.5385	46.1538	0	p__"Proteobacteria":c__Deltaproteobacteria:o__Desulfobacterales:f__Desulfobulbaceae:g__Desulfobulbus
Desulfocapsa	100	100	0	100	100	100	0	100	0	80	0	p__"Proteobacteria":c__Deltaproteobacteria:o__Desulfobacterales:f__Desulfobulbaceae:g__Desulfocapsa
Desulfocella	100	100	0	50	50	50	0	50	100	50	0	p__"Proteobacteria":c__Deltaproteobacteria:o__Desulfobacterales:f__Desulfobacteraceae:g__Desulfocella
Desulfococcus	100	75	0	75	75	75	0	75	25	75	0	p__"Proteobacteria":c__Deltaproteobacteria:o__Desulfobacterales:f__Desulfobacteraceae:g__Desulfococcus
Desulfocurvus	100	100	0	100	100	100	0	66.6667	66.6667	100	0	p__"Proteobacteria":c__Deltaproteobacteria:o__Desulfovibrionales:f__Desulfovibrionaceae:g__Desulfocurvus
Desulfofaba	100	100	0	100	100	100	0	50	100	100	0	p__"Proteobacteria":c__Deltaproteobacteria:o__Desulfobacterales:f__Desulfobacteraceae:g__Desulfofaba
Desulfofrigus	100	100	0	100	100	33.3333	0	100	100	100	0	p__"Proteobacteria":c__Deltaproteobacteria:o__Desulfobacterales:f__Desulfobacteraceae:g__Desulfofrigus
Desulfofustis	100	100	0	100	100	100	0	100	0	100	0	p__"Proteobacteria":c__Deltaproteobacteria:o__Desulfobacterales:f__Desulfobulbaceae:g__Desulfofustis
Desulfoglaeba	100	100	0	0	100	100	0	100	50	0	0	p__"Proteobacteria":c__Deltaproteobacteria:o__Syntrophobacterales:f__Syntrophobacteraceae:g__Desulfoglaeba
Desulfohalobium	100	100	0	100	100	75	0	100	75	100	0	p__"Proteobacteria":c__Deltaproteobacteria:o__Desulfovibrionales:f__Desulfohalobiaceae:g__Desulfohalobium
Desulfoluna	100	100	0	100	100	50	0	50	100	100	0	p__"Proteobacteria":c__Deltaproteobacteria:o__Desulfobacterales:f__Desulfobacteraceae:g__Desulfoluna
Desulfomicrobium	100	100	0	100	92.3077	100	0	80.7692	96.1538	65.3846	0	p__"Proteobacteria":c__Deltaproteobacteria:o__Desulfovibrionales:f__Desulfomicrobiaceae:g__Desulfomicrobium
Desulfomonile	100	100	0	100	100	100	0	0	50	100	0	p__"Proteobacteria":c__Deltaproteobacteria:o__Syntrophobacterales:f__Syntrophaceae:g__Desulfomonile
Desulfonatronovibrio	100	100	0	100	100	100	0	33.3333	100	100	0	p__"Proteobacteria":c__Deltaproteobacteria:o__Desulfovibrionales:f__Desulfohalobiaceae:g__Desulfonatronovibrio
Desulfonatronum	100	100	0	90	80	90	0	90	70	80	0	p__"Proteobacteria":c__Deltaproteobacteria:o__Desulfovibrionales:f__Desulfonatronaceae:g__Desulfonatronum
Desulfonauticus	100	100	0	100	100	100	0	100	100	100	0	p__"Proteobacteria":c__Deltaproteobacteria:o__Desulfovibrionales:f__Desulfohalobiaceae:g__Desulfonauticus
Desulfonema	100	100	0	100	100	100	0	100	0	100	0	p__"Proteobacteria":c__Deltaproteobacteria:o__Desulfobacterales:f__Desulfobacteraceae:g__Desulfonema
Desulfonispora	100	100	0	100	100	100	0	100	0	100	0	p__Firmicutes:c__Clostridia:o__Clostridiales:f__Peptococcaceae 1:g__Desulfonispora
Desulfopila	100	100	0	100	100	100	0	100	0	100	0	p__"Proteobacteria":c__Deltaproteobacteria:o__Desulfobacterales:f__Desulfobulbaceae:g__Desulfopila
Desulforhabdus	100	100	0	0	0	0	0	0	0	0	0	p__"Proteobacteria":c__Deltaproteobacteria:o__Syntrophobacterales:f__Syntrophobacteraceae:g__Desulforhabdus
Desulforhopalus	100	100	0	100	100	100	0	100	33.3333	66.6667	33.3333	p__"Proteobacteria":c__Deltaproteobacteria:o__Desulfobacterales:f__Desulfobulbaceae:g__Desulforhopalus
Desulfosalsimonas	100	100	0	100	100	100	0	100	100	100	0	p__"Proteobacteria":c__Deltaproteobacteria:o__Desulfobacterales:f__Desulfobacteraceae:g__Desulfosalsimonas
Desulfosarcina	100	100	0	80	80	100	0	80	100	100	0	p__"Proteobacteria":c__Deltaproteobacteria:o__Desulfobacterales:f__Desulfobacteraceae:g__Desulfosarcina
Desulfosoma	100	100	0	100	100	100	0	100	100	0	0	p__"Proteobacteria":c__Deltaproteobacteria:o__Syntrophobacterales:f__Syntrophobacteraceae:g__Desulfosoma
Desulfosporosinus	100	100	0	76.4706	72.549	100	0	43.1373	58.8235	78.4314	0	p__Firmicutes:c__Clostridia:o__Clostridiales:f__Peptococcaceae 1:g__Desulfosporosinus
Desulfotalea	100	90	0	90	80	90	0	90	0	90	0	p__"Proteobacteria":c__Deltaproteobacteria:o__Desulfobacterales:f__Desulfobulbaceae:g__Desulfotalea
Desulfothermus	100	100	0	100	100	100	0	100	100	100	100	p__"Proteobacteria":c__Deltaproteobacteria:o__Desulfovibrionales:f__Desulfohalobiaceae:g__Desulfothermus
Desulfotignum	100	100	0	100	100	100	0	100	100	100	0	p__"Proteobacteria":c__Deltaproteobacteria:o__Desulfobacterales:f__Desulfobacteraceae:g__Desulfotignum
Desulfotomaculum	100	85.7143	0	36.2637	1.0989	54.9451	0	20.8791	47.2527	17.5824	5.49451	p__Firmicutes:c__Clostridia:o__Clostridiales:f__Peptococcaceae 2:g__Desulfotomaculum
Desulfovibrio	100	98.2609	0	70.4348	51.7391	34.3478	0	30	6.95652	2.6087	0	p__"Proteobacteria":c__Deltaproteobacteria:o__Desulfovibrionales:f__Desulfovibrionaceae:g__Desulfovibrio
Desulfovirga	100	100	0	100	100	0	0	100	0	100	0	p__"Proteobacteria":c__Deltaproteobacteria:o__Syntrophobacterales:f__Syntrophobacteraceae:g__Desulfovirga
Desulfurella	100	100	0	100	100	100	0	100	100	100	0	p__"Proteobacteria":c__Deltaproteobacteria:o__Desulfurellales:f__Desulfurellaceae:g__Desulfurella
Desulfurispirillum	100	100	0	100	100	100	0	100	80	100	0	p__"Chrysiogenetes":c__Chrysiogenetes:o__Chrysiogenales:f__Chrysiogenaceae:g__Desulfurispirillum
Desulfurivibrio	100	100	0	100	66.6667	66.6667	0	66.6667	0	0	0	p__"Proteobacteria":c__Deltaproteobacteria:o__Desulfobacterales:f__Desulfobulbaceae:g__Desulfurivibrio
Desulfurobacterium	100	100	0	71.4286	57.1429	28.5714	0	57.1429	28.5714	85.7143	57.1429	p__"Aquificae":c__Aquificae:o__Aquificales:f__Desulfurobacteriaceae:g__Desulfurobacterium
Desulfuromonas	100	100	0	75	58.3333	33.3333	0	66.6667	0	25	0	p__"Proteobacteria":c__Deltaproteobacteria:o__Desulfuromonadales:f__Desulfuromonadaceae:g__Desulfuromonas
Desulfuromusa	100	100	0	75	100	100	0	100	0	0	0	p__"Proteobacteria":c__Deltaproteobacteria:o__Desulfuromonadales:f__Desulfuromonadaceae:g__Desulfuromusa
Dethiobacter	100	100	0	100	0	100	0	100	0	100	0	p__Firmicutes:c__Erysipelotrichia:o__Natranaerobiales:f__Natranaerobiaceae:g__Dethiobacter
Dethiosulfatibacter	100	100	0	100	0	100	0	100	0	100	0	p__Firmicutes:c__Clostridia:o__Clostridiales:f__Clostridiales_Incertae Sedis XI:g__Dethiosulfatibacter
Dethiosulfovibrio	100	100	0	25	0	100	0	100	100	100	0	p__"Synergistetes":c__Synergistia:o__Synergistales:f__Synergistaceae:g__Dethiosulfovibrio
Devosia	100	95.9184	0	0	0	46.9388	0	30.6122	0	53.0612	0	p__"Proteobacteria":c__Alphaproteobacteria:o__Rhizobiales:f__Hyphomicrobiaceae:g__Devosia
Devriesea	100	100	0	100	0	0	0	0	0	0	0	p__"Actinobacteria":c__Actinobacteria:o__Actinomycetales:f__Dermabacteraceae:g__Devriesea
Dialister	100	100	0	100	93.3333	100	0	86.6667	86.6667	86.6667	0	p__Firmicutes:c__Clostridia:o__Clostridiales:f__Veillonellaceae:g__Dialister
Dickeya	100	96.6667	0	15	35	66.6667	0	51.6667	8.33333	0	0	p__"Proteobacteria":c__Gammaproteobacteria:o__"Enterobacteriales":f__Enterobacteriaceae:g__Dickeya
Dictyoglomus	100	100	0	87.5	0	100	0	87.5	87.5	100	0	p__"Dictyoglomi":c__"Dictyoglomia":o__"Dictyoglomales":f__"Dictyoglomaceae":g__Dictyoglomus
Dietzia	100	100	0	100	0	100	0	0	0	0	0	p__"Actinobacteria":c__Actinobacteria:o__Actinomycetales:f__Dietziaceae:g__Dietzia
Dinoroseobacter	100	100	0	0	0	100	0	100	0	0	0	p__"Proteobacteria":c__Alphaproteobacteria:o__Rhodobacterales:f__Rhodobacteraceae:g__Dinoroseobacter
Diplorickettsia	100	100	0	100	33.3333	100	100	100	100	100	0	p__Nitrospinae:c__Fimbriimonadia:o__Magnetococcales:f__Magnetococcaceae:g__Diplorickettsia
Dokdonella	100	93.75	0	50	50	50	0	31.25	0	0	0	p__"Proteobacteria":c__Gammaproteobacteria:o__Xanthomonadales:f__Xanthomonadaceae:g__Dokdonella
Dokdonia	100	100	0	93.3333	93.3333	100	0	0	0	0	0	p__"Bacteroidetes":c__Flavobacteriia:o__"Flavobacteriales":f__Flavobacteriaceae:g__Dokdonia
Dolosicoccus	100	100	0	100	100	0	0	100	100	100	0	p__Firmicutes:c__Bacilli:o__Lactobacillales:f__Aerococcaceae:g__Dolosicoccus
Dolosigranulum	100	100	0	100	100	100	0	0	0	100	0	p__Firmicutes:c__Bacilli:o__Lactobacillales:f__Carnobacteriaceae:g__Dolosigranulum
Domibacillus	100	100	0	50	50	0	0	50	0	50	0	p__Nitrospinae:c__Fimbriimonadia:o__Fimbriimonadales:f__Mooreiaceae:g__Domibacillus
Donghicola	100	25	0	0	0	0	0	25	0	0	0	p__"Proteobacteria":c__Alphaproteobacteria:o__Rhodobacterales:f__Rhodobacteraceae:g__Donghicola
Dongia	100	100	0	0	0	50	0	50	0	50	0	p__"Proteobacteria":c__Alphaproteobacteria:o__Rhodospirillales:f__Rhodospirillaceae:g__Dongia
Dorea	100	100	0	0	0	100	0	0	100	100	0	p__Firmicutes:c__Clostridia:o__Clostridiales:f__Lachnospiraceae:g__Dorea
Duganella	100	70.8333	0	12.5	12.5	58.3333	0	8.33333	0	0	0	p__"Proteobacteria":c__Betaproteobacteria:o__Burkholderiales:f__Oxalobacteraceae:g__Duganella
Dyella	100	95.6522	0	50	65.2174	63.0435	0	0	0	0	0	p__"Proteobacteria":c__Gammaproteobacteria:o__Xanthomonadales:f__Xanthomonadaceae:g__Dyella
Ectothiorhodosinus	100	100	0	0	100	100	0	100	0	0	0	p__"Proteobacteria":c__Gammaproteobacteria:o__Chromatiales:f__Ectothiorhodospiraceae:g__Ectothiorhodosinus
Ectothiorhodospira	100	100	0	87.5	75	93.75	0	12.5	6.25	81.25	0	p__"Proteobacteria":c__Gammaproteobacteria:o__Chromatiales:f__Ectothiorhodospiraceae:g__Ectothiorhodospira
Edwardsiella	100	98.4615	0	0	43.8462	96.9231	0	98.4615	0	0	0	p__"Proteobacteria":c__Gammaproteobacteria:o__"Enterobacteriales":f__Enterobacteriaceae:g__Edwardsiella
Eggerthella	100	78.5714	0	64.2857	0	78.5714	0	0	7.14286	78.5714	0	p__"Actinobacteria":c__Actinobacteria:o__Coriobacteriales:f__Coriobacteriaceae:g__Eggerthella
Eggerthia	100	100	0	100	100	100	0	100	100	100	0	p__Nitrospinae:c__Fimbriimonadia:o__Fimbriimonadales:f__Fimbriimonadaceae:g__Eggerthia
Ehrlichia	100	25	0	0	0	25	0	25	25	25	0	p__"Proteobacteria":c__Alphaproteobacteria:o__Rickettsiales:f__Anaplasmataceae:g__Ehrlichia
Eikenella	100	77.7778	0	22.2222	77.7778	66.6667	0	22.2222	0	0	0	p__"Proteobacteria":c__Betaproteobacteria:o__Neisseriales:f__Neisseriaceae:g__Eikenella
Ekhidna	100	100	0	0	0	100	0	0	0	0	0	p__"Bacteroidetes":c__Sphingobacteriia:o__"Sphingobacteriales":f__Cytophagaceae:g__Ekhidna
Elizabethkingia	100	94.7368	0	34.2105	94.7368	94.7368	0	0	0	94.7368	0	p__"Bacteroidetes":c__Flavobacteriia:o__"Flavobacteriales":f__Flavobacteriaceae:g__Elizabethkingia
Elusimicrobium	100	100	0	100	0	100	0	100	100	100	0	p__"Elusimicrobia":c__Elusimicrobia:o__Elusimicrobiales:f__Elusimicrobiaceae:g__Elusimicrobium
Empedobacter	100	44.4444	0	33.3333	22.2222	33.3333	0	0	0	0	0	p__"Bacteroidetes":c__Flavobacteriia:o__"Flavobacteriales":f__Flavobacteriaceae:g__Empedobacter
Endobacter	100	100	0	100	0	100	0	100	0	0	0	p__Nitrospinae:c__Thermoflexia:o__Candidatus Brocadiales:f__Candidatus Brocadiaceae:g__Endobacter
Endozoicomonas	100	100	0	0	50	50	0	25	100	75	0	p__"Proteobacteria":c__Gammaproteobacteria:o__Oceanospirillales:f__Hahellaceae:g__Endozoicomonas
Enhydrobacter	100	85.7143	0	0	85.7143	85.7143	0	28.5714	0	0	0	p__"Proteobacteria":c__Gammaproteobacteria:o__Pseudomonadales:f__Moraxellaceae:g__Enhydrobacter
Enhygromyxa	100	100	0	100	100	100	0	100	0	100	0	p__"Proteobacteria":c__Deltaproteobacteria:o__Myxococcales:f__Nannocystaceae:g__Enhygromyxa
Ensifer	100	96.9767	0	0	0	1.16279	0	61.1628	0	0	0	p__"Proteobacteria":c__Alphaproteobacteria:o__Rhizobiales:f__Rhizobiaceae:g__Ensifer
Enteractinococcus	100	33.3333	0	33.3333	0	33.3333	0	33.3333	0	0	0	p__Nitrospinae:c__Thermoflexia:o__Candidatus Brocadiales:f__Candidatus Brocadiaceae:g__Enteractinococcus
Enterobacter	100	69.8413	0	0	0	0	0	0	0	0	0	p__"Proteobacteria":c__Gammaproteobacteria:o__"Enterobacteriales":f__Enterobacteriaceae:g__Enterobacter
Enterococcus	100	98.9754	0	95.2869	43.0328	4.5082	0	60.041	0.102459	92.1107	0	p__Firmicutes:c__Bacilli:o__Lactobacillales:f__Enterococcaceae:g__Enterococcus
Enterorhabdus	100	100	0	100	0	100	0	0	100	100	0	p__"Actinobacteria":c__Actinobacteria:o__Coriobacteriales:f__Coriobacteriaceae:g__Enterorhabdus
Enterovibrio	100	100	0	45.4545	72.7273	90.9091	0	45.4545	0	63.6364	0	p__"Proteobacteria":c__Gammaproteobacteria:o__"Vibrionales":f__Vibrionaceae:g__Enterovibrio
Entomoplasma	100	50	0	50	37.5	50	0	0	25	50	0	p__"Tenericutes":c__Mollicutes:o__Entomoplasmatales:f__Entomoplasmataceae:g__Entomoplasma
Erwinia	100	89.1566	0	48.1928	7.83133	0	0	50.6024	0	0	0	p__"Proteobacteria":c__Gammaproteobacteria:o__"Enterobacteriales":f__Enterobacteriaceae:g__Erwinia
Erysipelothrix	100	100	0	96.6667	90	100	0	0	83.3333	100	83.3333	p__Firmicutes:c__Erysipelotrichia:o__Erysipelotrichales:f__Erysipelotrichaceae:g__Erysipelothrix
Erythrobacter	100	87.7358	0	0	0	64.1509	0	64.1509	23.5849	71.6981	0	p__"Proteobacteria":c__Alphaproteobacteria:o__Sphingomonadales:f__Erythrobacteraceae:g__Erythrobacter
Escherichia/Shigella	100	80	0	0	80	60	0	60	0	0	0	p__"Proteobacteria":c__Gammaproteobacteria:o__"Enterobacteriales":f__Enterobacteriaceae:g__Escherichia/Shigella
Ethanoligenens	100	100	0	100	0	100	0	83.3333	100	100	0	p__Firmicutes:c__Clostridia:o__Clostridiales:f__Ruminococcaceae:g__Ethanoligenens
Eubacterium	100	33.8583	0	28.3465	0	8.66142	0	16.5354	0	2.3622	0	p__Firmicutes:c__Clostridia:o__Clostridiales:f__Eubacteriaceae:g__Eubacterium
Eudoraea	100	100	0	0	0	0	0	0	0	0	0	p__"Bacteroidetes":c__Flavobacteriia:o__"Flavobacteriales":f__Flavobacteriaceae:g__Eudoraea
Euzebya	100	100	0	100	0	100	0	0	100	100	0	p__"Actinobacteria":c__Actinobacteria:o__Euzebyales:f__Euzebyaceae:g__Euzebya
Exiguobacterium	100	100	0	99.5283	62.2642	97.1698	0	82.5472	34.9057	97.1698	0	p__Firmicutes:c__Bacilli:o__Bacillales:f__Bacillales_Incertae Sedis XII:g__Exiguobacterium
Exilispira	100	100	0	100	100	100	0	100	0	100	0	p__"Spirochaetes":c__Spirochaetia:o__Spirochaetales:f__Spirochaetales_incertae_sedis:g__Exilispira
Extensimonas	100	100	0	100	100	0	0	0	0	0	0	p__Nitrospinae:c__Fimbriimonadia:o__Magnetococcales:f__SAR11:g__Extensimonas
Facklamia	100	100	0	100	100	60	0	100	0	60	0	p__Firmicutes:c__Bacilli:o__Lactobacillales:f__Aerococcaceae:g__Facklamia
Faecalibacterium	100	72.7273	0	36.3636	0	63.6364	0	0	54.5455	54.5455	0	p__Firmicutes:c__Clostridia:o__Clostridiales:f__Ruminococcaceae:g__Faecalibacterium
Fangia	100	100	0	50	50	50	0	50	50	50	0	p__"Proteobacteria":c__Gammaproteobacteria:o__Thiotrichales:f__Thiotrichales_incertae_sedis:g__Fangia
Ferribacterium	100	100	0	0	50	100	0	0	0	50	0	p__"Proteobacteria":c__Betaproteobacteria:o__Rhodocyclales:f__Rhodocyclaceae:g__Ferribacterium
Ferrimicrobium	100	100	0	100	0	100	0	0	0	0	0	p__"Actinobacteria":c__Actinobacteria:o__Acidimicrobiales:f__Acidimicrobiaceae:g__Ferrimicrobium
Ferrimonas	100	100	0	97.5	30	80	0	10	0	87.5	0	p__"Proteobacteria":c__Gammaproteobacteria:o__Alteromonadales:f__Ferrimonadaceae:g__Ferrimonas
Ferritrophicum	100	100	0	100	100	0	0	100	0	0	0	p__Nitrospinae:c__Thermoflexia:o__Ferritrophicales:f__Ferritrophicaceae:g__Ferritrophicum
Ferrovum	100	100	0	0	0	0	0	0	0	0	0	p__Nitrospinae:c__Thermoflexia:o__Ferrovales:f__Ferrovaceae:g__Ferrovum
Fervidicola	100	100	0	100	0	100	0	100	0	100	0	p__Firmicutes:c__Clostridia:o__Clostridiales:f__Clostridiales_Incertae Sedis III:g__Fervidicola
Fervidobacterium	100	100	0	92.8571	0	92.8571	0	57.1429	14.2857	57.1429	0	p__"Thermotogae":c__Thermotogae:o__Thermotogales:f__Fervidobacteriaceae:g__Fervidobacterium
Fibrobacter	100	100	0	0	0	100	0	100	100	100	0	p__"Fibrobacteres":c__"Fibrobacteria":o__"Fibrobacterales":f__"Fibrobacteraceae":g__Fibrobacter
Filibacter	100	100	0	0	100	0	0	100	0	0	0	p__Firmicutes:c__Bacilli:o__Bacillales:f__Planococcaceae:g__Filibacter
Filifactor	100	100	0	81.8182	0	100	0	81.8182	81.8182	81.8182	0	p__Firmicutes:c__Clostridia:o__Clostridiales:f__Peptostreptococcaceae:g__Filifactor
Filobacillus	100	75	0	50	50	0	0	0	0	75	0	p__Firmicutes:c__Bacilli:o__Bacillales:f__Bacillaceae 2:g__Filobacillus
Filomicrobium	100	100	0	0	0	100	0	100	0	100	0	p__"Proteobacteria":c__Alphaproteobacteria:o__Rhizobiales:f__Hyphomicrobiaceae:g__Filomicrobium
Fimbriimonas	100	100	0	100	0	100	0	0	100	100	0	p__Nitrospinae:c__Fimbriimonadia:o__Fimbriimonadales:f__Fimbriimonadaceae:g__Fimbriimonas
Finegoldia	100	92.8571	0	92.8571	0	92.8571	0	92.8571	78.5714	92.8571	0	p__Firmicutes:c__Clostridia:o__Clostridiales:f__Clostridiales_Incertae Sedis XI:g__Finegoldia
Flagellimonas	100	100	0	100	0	100	0	0	0	0	0	p__"Bacteroidetes":c__Flavobacteriia:o__"Flavobacteriales":f__Flavobacteriaceae:g__Flagellimonas
Flammeovirga	100	100	0	100	100	100	0	0	100	100	0	p__"Bacteroidetes":c__Sphingobacteriia:o__"Sphingobacteriales":f__Flammeovirgaceae:g__Flammeovirga
Flavihumibacter	100	100	0	0	0	0	0	0	100	100	0	p__"Bacteroidetes":c__Sphingobacteriia:o__"Sphingobacteriales":f__Chitinophagaceae:g__Flavihumibacter
Flavivirga	100	50	0	50	0	0	0	0	0	0	0	p__Nitrospinae:c__Thermoflexia:o__Candidatus Brocadiales:f__Candidatus Brocadiaceae:g__Flavivirga
Flavobacterium	100	96.2559	0	53.9782	40.5616	89.2356	0	0	0	1.40406	0	p__"Bacteroidetes":c__Flavobacteriia:o__"Flavobacteriales":f__Flavobacteriaceae:g__Flavobacterium
Flavonifractor	100	100	0	100	0	100	0	22.2222	0	83.3333	0	p__Firmicutes:c__Erysipelotrichia:o__Erysipelotrichales:f__Bacillales_incertae_sedis:g__Flavonifractor
Flexistipes	100	20	0	20	20	20	0	0	20	20	0	p__"Deferribacteres":c__Deferribacteres:o__Deferribacterales:f__Deferribacteraceae:g__Flexistipes
Flexithrix	100	76.9231	0	76.9231	76.9231	76.9231	0	0	69.2308	69.2308	0	p__"Bacteroidetes":c__Sphingobacteriia:o__"Sphingobacteriales":f__Flammeovirgaceae:g__Flexithrix
Fluviicola	100	100	0	0	0	0	0	0	0	0	0	p__"Bacteroidetes":c__Flavobacteriia:o__"Flavobacteriales":f__Cryomorphaceae:g__Fluviicola
Fodinibacter	100	100	0	100	0	0	0	0	0	0	0	p__"Actinobacteria":c__Actinobacteria:o__Actinomycetales:f__Intrasporangiaceae:g__Fodinibacter
Fodinicurvata	100	100	0	0	0	100	0	100	100	100	0	p__"Proteobacteria":c__Alphaproteobacteria:o__Rhodospirillales:f__Rhodospirillaceae:g__Fodinicurvata
Fontibacillus	100	66.6667	0	66.6667	66.6667	66.6667	0	66.6667	66.6667	66.6667	0	p__Firmicutes:c__Erysipelotrichia:o__Erysipelotrichales:f__Bacillales_incertae_sedis:g__Fontibacillus
Formivibrio	100	100	0	100	100	100	0	0	0	0	0	p__"Proteobacteria":c__Betaproteobacteria:o__Neisseriales:f__Neisseriaceae:g__Formivibrio
Formosa	100	50	0	37.5	37.5	45.8333	0	0	0	25	0	p__"Bacteroidetes":c__Flavobacteriia:o__"Flavobacteriales":f__Flavobacteriaceae:g__Formosa
Francisella	100	100	0	93.5484	89.5161	96.7742	0	82.2581	100	92.7419	0	p__"Proteobacteria":c__Gammaproteobacteria:o__Thiotrichales:f__Francisellaceae:g__Francisella
Frateuria	100	76.4706	0	70.5882	76.4706	0	0	5.88235	0	0	0	p__"Proteobacteria":c__Gammaproteobacteria:o__Xanthomonadales:f__Xanthomonadaceae:g__Frateuria
Friedmanniella	100	100	0	100	0	100	0	0	0	55.5556	0	p__"Actinobacteria":c__Actinobacteria:o__Actinomycetales:f__Propionibacteriaceae:g__Friedmanniella
Frigoribacterium	100	76.1905	0	0	0	0	0	0	0	0	0	p__"Actinobacteria":c__Actinobacteria:o__Actinomycetales:f__Microbacteriaceae:g__Frigoribacterium
Frischella	100	100	0	100	100	100	0	100	0	100	0	p__Nitrospinae:c__Thermoflexia:o__Orbales:f__Orbaceae:g__Frischella
Frondihabitans	100	100	0	50	0	0	0	0	0	0	0	p__"Actinobacteria":c__Actinobacteria:o__Actinomycetales:f__Microbacteriaceae:g__Frondihabitans
Fructobacillus	100	100	0	66.6667	100	100	0	100	77.7778	100	0	p__Firmicutes:c__Erysipelotrichia:o__Erysipelotrichales:f__Bacillales_incertae_sedis:g__Fructobacillus
Fulvibacter	100	100	0	100	100	100	0	0	100	100	0	p__"Bacteroidetes":c__Flavobacteriia:o__"Flavobacteriales":f__Flavobacteriaceae:g__Fulvibacter
Fulvimarina	100	75	0	0	0	75	0	75	0	0	0	p__"Proteobacteria":c__Alphaproteobacteria:o__Rhizobiales:f__"Aurantimonadaceae":g__Fulvimarina
Fulvimonas	100	33.3333	0	33.3333	33.3333	0	0	0	0	0	0	p__"Proteobacteria":c__Gammaproteobacteria:o__Xanthomonadales:f__Xanthomonadaceae:g__Fulvimonas
Fusibacter	100	100	0	25	0	25	0	25	25	25	0	p__Firmicutes:c__Clostridia:o__Clostridiales:f__Clostridiales_Incertae Sedis XII:g__Fusibacter
Fusobacterium	100	96.748	0	74.7967	0	92.6829	0	82.1138	84.5528	71.5447	0	p__"Fusobacteria":c__Fusobacteriia:o__"Fusobacteriales":f__"Fusobacteriaceae":g__Fusobacterium
Gaetbulibacter	100	66.6667	0	50	0	0	0	0	0	0	0	p__"Bacteroidetes":c__Flavobacteriia:o__"Flavobacteriales":f__Flavobacteriaceae:g__Gaetbulibacter
Gaetbulicola	100	100	0	0	0	0	0	0	0	0	0	p__"Proteobacteria":c__Alphaproteobacteria:o__Rhodobacterales:f__Rhodobacteraceae:g__Gaetbulicola
Gaiella	100	100	0	100	100	100	0	100	100	100	0	p__Nitrospinae:c__Thermoflexia:o__Gaiellales:f__Gaiellaceae:g__Gaiella
Galbibacter	100	75	0	75	0	75	0	0	0	0	0	p__"Bacteroidetes":c__Flavobacteriia:o__"Flavobacteriales":f__Flavobacteriaceae:g__Galbibacter
Gallibacterium	100	100	0	76.4706	1.96078	70.5882	0	84.3137	84.3137	100	0	p__"Proteobacteria":c__Gammaproteobacteria:o__Pasteurellales:f__Pasteurellaceae:g__Gallibacterium
Gangjinia	100	100	0	100	100	100	0	0	0	100	0	p__"Bacteroidetes":c__Flavobacteriia:o__"Flavobacteriales":f__Flavobacteriaceae:g__Gangjinia
Garciella	100	100	0	66.6667	0	66.6667	0	66.6667	66.6667	66.6667	0	p__Firmicutes:c__Clostridia:o__Clostridiales:f__Eubacteriaceae:g__Garciella
Gelidibacter	100	77.7778	0	77.7778	0	55.5556	0	0	0	0	0	p__"Bacteroidetes":c__Flavobacteriia:o__"Flavobacteriales":f__Flavobacteriaceae:g__Gelidibacter
Gelria	100	100	0	100	0	100	0	100	100	100	100	p__Firmicutes:c__Clostridia:o__Thermoanaerobacterales:f__Thermoanaerobacteraceae:g__Gelria
Gemella	100	100	0	100	100	100	0	92.3077	100	84.6154	0	p__Firmicutes:c__Bacilli:o__Bacillales:f__Bacillales_Incertae Sedis XI:g__Gemella
Gemmata	100	100	0	0	60	60	0	60	60	60	0	p__"Planctomycetes":c__Planctomycetia:o__Planctomycetales:f__Planctomycetaceae:g__Gemmata
[truncated: 967 more rows]
